# Supplementary material for: Isoelectronic Pt(ii) complexes of cyclometalating C^N^N ligands with phenyl/(benzo)thiophenyl and pyridyl/(benzo)thiazolyl moieties
Source: Royal Society of Chemistry journal article supplement (doi:10.1039/d2dt02688k), 2022-01-01
Supplement: d2dt02688k2.pdf [file d2dt02688k2.pdf]

## Electronic Supplementary Information (ESI) II – structures, CV, UV-vis spectroscopy and DFT calculations

for

### Isoelectronic Pt(II) Complexes of Cyclometalating C<sup>N</sup>N Ligands with Phenyl/(Benzo)thiophenyl/Pyridyl/(Benzo)thiazole Moieties

Maren Krause,<sup>a</sup> Joshua Nicolas Friedel,<sup>a</sup> Stefan Buss,<sup>b</sup> Dana Brünink,<sup>c</sup> Annemarie Berger,<sup>a</sup> Cristian A. Strassert,<sup>b,\*</sup> Nikos L. Doltsinis,<sup>c,\*</sup> Axel Klein<sup>a,\*</sup>

\* to whom the correspondence should be addressed: e-mail: [axel.klein@uni-koeln.de](mailto:axel.klein@uni-koeln.de)

#### Contents

#### Photophysical characterisation

#### Supporting Figures

**Fig. S1** Crystal structure of [Pt(th(ppy)py)Cl]·CD<sub>2</sub>Cl<sub>2</sub> (**10**·CH<sub>2</sub>Cl<sub>2</sub>) viewed along the crystallographic *b* and *c* axes.

**Fig. S2** Crystal structure of [Pt(ph(tbppy)bzt)CCPh] (**9**) viewed along the crystallographic *a* axis.

**Fig. S3** Crystal structure of [Pt(ph(tbppy)bzt)CCPh] (**9**) viewed along the crystallographic *c* axis.

**Fig. S4** Intermolecular  $\pi$ -stacking interactions in [Pt(ph(tbppy)bzt)CCPh] (**9**).

**Fig. S5** Cyclic voltammograms of [Pt(ph(ppy)tz)Cl] (**1**).

**Fig. S6** Cyclic voltammograms of [Pt(ph(tbppy)tz)Cl] (**2**).

**Fig. S7** Cyclic voltammograms of [Pt(ph(tbppy)tz)CCPh] (**3**).

**Fig. S8** Cyclic voltammograms of [Pt(ph(tbppy)tz)CCF<sub>5</sub>] (**4**).

**Fig. S9** Cyclic voltammograms of [Pt(na(tbppy)tz)Cl] (**5**).

**Fig. S10** Cyclic voltammograms of [Pt(na(tbppy)tz)CCPh] (**6**).

**Fig. S11** Cyclic voltammograms of [Pt(ph(ppy)btz)Cl] (**7**).

**Fig. S12** Cyclic voltammograms of [Pt(ph(tbppy)btz)Cl] (**8**).

**Fig. S13** Cyclic voltammograms of [Pt(ph(tbppy)btz)CCPh] (**9**) and [Pt(th(tbppy)tz)CCPh] (**18**).

**Fig. S14** Cyclic voltammograms of [Pt(th(ppy)py)Cl] (**10**).

**Fig. S15** Cyclic voltammograms of [Pt(th(tbppy)py)Cl] (**11**).

**Fig. S16** Cyclic voltammograms of [Pt(th(tbppy)py)CCPh] (**12**).

**Fig. S17** Cyclic voltammograms of [Pt(th(tbppy)py)CCF<sub>5</sub>] (**13**).

**Fig. S18** Cyclic voltammograms of [Pt(bth(ppy)py)Cl] (**14**).

**Fig. S19** Cyclic voltammograms of [Pt(bth(tbppy)py)Cl] (**15**).

**Fig. S20** Cyclic voltammograms of [Pt(bth(tbppy)py)CCPh] (**16**).

**Fig. S21** Cyclic voltammograms of [Pt(th(tbppy)tz)Cl] (**17**).

**Fig. S22** Cyclic voltammograms of [Pt(th(ppy)tz)Cl].

**Fig. S23** Cyclic voltammograms of Hth(ppy)py, Hth(tbppy)py, and Hbth(ppy)py.

**Fig. S24** Cyclic voltammograms of Hbth(tbppy)py, Hph(ppy)tz, and Hph(tbppy)tz.

**Fig. S25** Cyclic voltammograms of Hna(ppy)tz and Hna(tbppy)tz.

**Fig. S26** Cyclic voltammograms of Hph(ppy)btz, Hph(tbppy)btz, and Hth(tbppy)tz.

**Fig. S27** DFT-optimised geometries of complexes from **class A** with coligand X = Cl and R<sup>1</sup> = H and R<sup>1</sup> = 3,5-*t*Bu<sub>2</sub>.

**Fig. S28** DFT-optimised geometries of complexes from **classes A** and **B** with coligands X = CCPh, Cl, CCC<sub>6</sub>F<sub>5</sub> and R<sup>1</sup> = 3,5-*t*Bu<sub>2</sub>.

**Fig. S29** DFT-calculated compositions of LUMO and HOMO of [Pt(th(tbppy)py)Cl] (**11**) and [Pt(th(tbppy)py)CCPh] (**12**).

**Fig. S30** UV-vis absorption spectra of protoligands with 4-phenyl-pyridyl (Hppy) and 3,5-*t*Bu<sub>2</sub>-phenyl-pyridyl (Htbppy).

**Fig. S31** UV-vis absorption spectra of [Pt(ph(tbppy)tz)(Cl/R)] (R = CCPh, CCC<sub>6</sub>F<sub>5</sub>) (**2**, **3**, **4**) and [Pt(th(tbppy)py)(Cl/R)] (R = CCPh, CCC<sub>6</sub>F<sub>5</sub>) (**11**, **12**, **13**).

**Fig. S32** UV-vis absorption spectra of [Pt(th(ppy)py)Cl] (**10**) and [Pt(bth(ppy)py)Cl] (**14**) and [Pt(ph(ppy)tz)Cl] (**1**) and [Pt(ph(ppy)btz)Cl] (**7**).

**Fig. S33** UV-vis absorption spectra of [Pt(ph(tbppy)btz)Cl] (**8**), [Pt(ph(tbppy)btz)(CCPh)] (**9**), [Pt(bth(tbppy)py)Cl] (**15**), and [Pt(bth(tbppy)py)(CCPh)] (**16**).

**Fig. S34** UV-vis absorption spectra of [Pt(th(tbppy)tz)Cl] (**17**), [Pt(th(tbppy)tz)(CCPh)] (**18**), and [Pt(na(tbppy)tz)(CCPh)] (**6**).

**Fig. S35** TD-DFT-calculated UV-vis absorption spectra (THEO, red) compared to experimental spectra (EXP, black) of [Pt(ph(ppy)tz)Cl] (**1**) and [Pt(ph(tbppy)tz)Cl] (**2**).

**Fig. S36** TD-DFT-calculated UV-vis absorption spectra (THEO, red) compared to experimental spectra (EXP, black) of [Pt(th(tbppy)py)C≡CPh] (**12**), [Pt(ph(tbppy)tz)Cl] (**2**), and [Pt(th(tbppy)py)C≡CC<sub>6</sub>F<sub>5</sub>] (**13**).

**Fig. S37** UV-vis absorption and emission spectra of [Pt(th(tbppy)py)(CCPh)] (**12**) and [Pt(bth(tbppy)py)(CCPh)] (**16**) in CH<sub>2</sub>Cl<sub>2</sub> at 298 K.

**Fig. S38** UV-vis absorption and emission spectra of [Pt(th(ppy)py)Cl] (**10**) and [Pt(ph(ppy)py)Cl] in CH<sub>2</sub>Cl<sub>2</sub> at 298 K.

**Fig. S39** UV-vis absorption and emission spectra of [Pt(th(tbppy)py)Cl] (**11**) and [Pt(bth(tbppy)py)Cl] (**15**) in CH<sub>2</sub>Cl<sub>2</sub> at 298 K.

**Fig. S40** UV-vis absorption and emission spectra of [Pt(th(tbppy)py)X] (**11**, **12**, **13**) with X = Cl, CCPh, or CCC<sub>6</sub>F<sub>5</sub> in CH<sub>2</sub>Cl<sub>2</sub> at 298 K.

**Fig. S41** UV-vis absorption and emission spectra of [Pt(ph(tbppy)tz)X] (**2**, **3**, **4**) with X = Cl, CCPh, or CCC<sub>6</sub>F<sub>5</sub> in CH<sub>2</sub>Cl<sub>2</sub> at 298 K.

**Fig. S42** UV-vis absorption and emission spectra of [Pt(ph(ppy)py)Cl] and [Pt(ph(ppy)tz)Cl] (**1**) in CH<sub>2</sub>Cl<sub>2</sub> at 298 K.

**Fig. S43** UV-vis absorption and emission spectra of [Pt(ph(tbppy)tz)Cl] (**2**) and [Pt(na(tbppy)tz)Cl] (**5**) in CH<sub>2</sub>Cl<sub>2</sub> at 298 K.

**Fig. S44** UV-vis absorption and emission spectra of [Pt(ph(tbppy)tz)Cl] (**2**) and [Pt(ph(tbppy)btz)Cl] (**8**) in CH<sub>2</sub>Cl<sub>2</sub> at 298 K.

**Fig. S45** Normalised photoluminescence spectra of [Pt(th(tbppy)py)Cl] (**11**), [Pt(ph(tbppy)tz)Cl] (**2**), [Pt(th(tbppy)tz)Cl] (**17**), [Pt(th(tbppy)py)CCPh] (**12**), [Pt(ph(tbppy)tz)CCPh] (**3**) and [Pt(th(tbppy)tz)CCPh] (**18**) in CH<sub>2</sub>Cl<sub>2</sub> at 298 K or frozen glassy CH<sub>2</sub>Cl<sub>2</sub>/MeOH matrices at 77 K.

**Fig. S46** Normalised photoluminescence spectra of [Pt(ph(tbppy)tz)CCPh] (**3**), [Pt(na(tbppy)tz)CCPh] (**6**) and [Pt(ph(tbppy)btz)CCPh] (**9**) in CH<sub>2</sub>Cl<sub>2</sub> at 298 K and in frozen glassy CH<sub>2</sub>Cl<sub>2</sub>/MeOH matrices (V:V = 1:1) at 77 K.

**Fig. S47** Normalised photoluminescence spectra of [Pt(th(tbppy)py)CCPh] (**12**) and [Pt(bth(tbppy)py)CCPh] (**16**) in CH<sub>2</sub>Cl<sub>2</sub> at 298 K and in frozen glassy CH<sub>2</sub>Cl<sub>2</sub>/MeOH matrices (V:V = 1:1) at 77 K.

**Fig. S48** Normalised photoluminescence spectra of [Pt(th(tbppy)py)CCPh] (**12**), [Pt(ph(tbppy)tz)CCPh] (**3**) and [Pt(th(tbppy)tz)CCPh] (**18**) in CH<sub>2</sub>Cl<sub>2</sub> at 298 K and in frozen glassy CH<sub>2</sub>Cl<sub>2</sub>/MeOH matrices (V:V = 1:1) at 77 K.

**Fig. S49** Normalised emission spectra of [Pt(ph(ppy)tz)Cl] (**1**), [Pt(th(ppy)py)Cl] (**10**) and [Pt(th(ppy)tz)Cl] in CH<sub>2</sub>Cl<sub>2</sub> at 298 K.

**Fig. S50** Normalised emission spectra of, [Pt(bth(tbppy)py)Cl] (**15**), [Pt(bth(ppy)py)Cl] (**14**), and [Pt(ph(ppy)btz)Cl] (**7**) and [Pt(na(ppy)tz)Cl] in CH<sub>2</sub>Cl<sub>2</sub> at 298 K.

**Fig. S51** Normalised emission spectra of [Pt(ph(tbppy)btz)(CCPh)] (**9**), [Pt(ph(tbppy)btz)Cl] (**8**), [Pt(na(tbppy)tz)Cl] (**5**) and [Pt(na(tbppy)tz)(CCPh)] (**6**) in CH<sub>2</sub>Cl<sub>2</sub> at 298 K.

**Fig. S52** Normalised emission spectra of [Pt(ph(tbppy)tz)X] with X = Cl, CCPh, or CCC<sub>6</sub>F<sub>5</sub> (**2**), (**3**) and (**4**) in glassy frozen CH<sub>2</sub>Cl<sub>2</sub>/MeOH (1:1) matrix at 77 K.

**Fig. S53** Excitation and emission spectra of [Pt(ph(tbppy)tz)(CCPh)] (**3**) at 298 K in CH<sub>2</sub>Cl<sub>2</sub> and at 77 K in a frozen glassy CH<sub>2</sub>Cl<sub>2</sub>/MeOH matrix (V:V = 1:1).

**Fig. S54** Time-resolved photoluminescence decay of [Pt(ph(tbppy)tz)CCPh] (**3**) in CH<sub>2</sub>Cl<sub>2</sub> at 298 K (air-equilibrated).

**Fig. S55** Time-resolved photoluminescence decay of [Pt(ph(tbppy)tz)CCPh] (**3**) in CH<sub>2</sub>Cl<sub>2</sub> at 298 K (Ar-purged).

**Fig. S56** Time-resolved photoluminescence decay of [Pt(ph(tbppy)tz)CCPh] (**3**) in a frozen glassy CH<sub>2</sub>Cl<sub>2</sub>/MeOH matrix (V:V = 1:1) at 77 K.

**Fig. S57** Excitation and emission spectra of [Pt(ph(tbppy)tz)(CCC<sub>6</sub>F<sub>5</sub>)] (**4**) at 298 K in CH<sub>2</sub>Cl<sub>2</sub> and at 77 K in a frozen glassy CH<sub>2</sub>Cl<sub>2</sub>/MeOH matrix (V:V = 1:1).

**Fig. S58** Time-resolved photoluminescence decay of [Pt(ph(tbppy)tz)CC<sub>6</sub>F<sub>5</sub>] (**4**) in CH<sub>2</sub>Cl<sub>2</sub> at 298 K (air-equilibrated).

**Fig. S59** Time-resolved photoluminescence decay of [Pt(ph(tbppy)tz)CC<sub>6</sub>F<sub>5</sub>] (**4**) in CH<sub>2</sub>Cl<sub>2</sub> at 298 K (Ar-purged).

**Fig. S60** Time-resolved photoluminescence decay of [Pt(ph(tbppy)tz)CC<sub>6</sub>F<sub>5</sub>] (**4**) in a frozen glassy CH<sub>2</sub>Cl<sub>2</sub>/MeOH matrix (V:V = 1:1) at 77 K.

**Fig. S61** Excitation and emission spectra of [Pt(na(tbppy)tz)(CCPh)] (**6**) at 298 K in CH<sub>2</sub>Cl<sub>2</sub> and at 77 K in a frozen glassy CH<sub>2</sub>Cl<sub>2</sub>/MeOH matrix (V:V = 1:1).

**Fig. S62** Time-resolved photoluminescence decay of [Pt(na(tbppy)tz)CCPh] (**6**) in CH<sub>2</sub>Cl<sub>2</sub> at 298 K (air-equilibrated).

**Fig. S63** Time-resolved photoluminescence decay of [Pt(na(tbppy)tz)CCPh] (**6**) in CH<sub>2</sub>Cl<sub>2</sub> at 298 K (Ar-purged).

**Fig. S64** Time-resolved photoluminescence decay of [Pt(na(tbppy)tz)CCPh] (**6**) in a frozen glassy CH<sub>2</sub>Cl<sub>2</sub>/MeOH matrix (V:V = 1:1) at 77 K.

**Fig. S65** Excitation and emission spectra of [Pt(ph(tbppy)btz)Cl] (**8**) at 298 K in CH<sub>2</sub>Cl<sub>2</sub> and at 77 K in a frozen glassy CH<sub>2</sub>Cl<sub>2</sub>/MeOH matrix (V:V = 1:1).

**Fig. S66** Time-resolved photoluminescence decay of [Pt(ph(tbppy)btz)Cl] (**8**) in CH<sub>2</sub>Cl<sub>2</sub> at 298 K (air-equilibrated).

**Fig. S67** Time-resolved photoluminescence decay of [Pt(ph(tbppy)btz)Cl] (**8**) in CH<sub>2</sub>Cl<sub>2</sub> at 298 K (Ar-purged).

**Fig. S68** Time-resolved photoluminescence decay of [Pt(ph(tbppy)btz)Cl] (**8**) in a frozen glassy CH<sub>2</sub>Cl<sub>2</sub>/MeOH matrix (V:V = 1:1) at 77 K.

**Fig. S69** Excitation and emission spectra of [Pt(ph(tbppy)btz)CCPh] (**9**) at 298 K in CH<sub>2</sub>Cl<sub>2</sub> and at 77 K in a frozen glassy CH<sub>2</sub>Cl<sub>2</sub>/MeOH matrix (V:V = 1:1).

**Fig. S70** Time-resolved photoluminescence decay of [Pt(ph(tbppy)btz)CCPh] (**9**) in CH<sub>2</sub>Cl<sub>2</sub> at 298 K (air-equilibrated).

**Fig. S71** Time-resolved photoluminescence decay of [Pt(ph(tbppy)btz)CCPh] (**9**) in CH<sub>2</sub>Cl<sub>2</sub> at 298 K (Ar-purged).

**Fig. S72** Time-resolved photoluminescence decay of [Pt(ph(tbppy)btz)CCPh] (**9**) in a frozen glassy CH<sub>2</sub>Cl<sub>2</sub>/MeOH matrix (V:V = 1:1) at 77 K.

**Fig. S73** Excitation (dotted line) and emission spectra (solid line) of [Pt(th(ppy)py)Cl] (**10**) ( $\lambda_{\text{exc}} = 350 \text{ nm}$ ;  $\lambda_{\text{em}} = 600 \text{ nm}$ ) at 298 K (black) in CH<sub>2</sub>Cl<sub>2</sub> and at 77 K (red) in a frozen glassy CH<sub>2</sub>Cl<sub>2</sub>/MeOH matrix (V:V = 1:1).

**Fig. S74** Time-resolved photoluminescence decay of [Pt(th(ppy)py)Cl] (**10**) in CH<sub>2</sub>Cl<sub>2</sub> at 298 K (Ar-purged).

**Fig. S75** Time-resolved photoluminescence decay of [Pt(th(ppy)py)Cl] (**10**) in a frozen glassy CH<sub>2</sub>Cl<sub>2</sub>/MeOH matrix (V:V = 1:1) at 77 K.

**Fig. S76** Excitation and emission spectra of [Pt(th(tbppy)py)Cl] (**11**) at 298 K in CH<sub>2</sub>Cl<sub>2</sub> and at 77 K in a frozen glassy CH<sub>2</sub>Cl<sub>2</sub>/MeOH matrix (V:V = 1:1).

**Fig. S77** Time-resolved photoluminescence decay of [Pt(th(tbppy)py)Cl] (**11**) in CH<sub>2</sub>Cl<sub>2</sub> at 298 K (air-equilibrated).

**Fig. S78** Time-resolved photoluminescence decay of [Pt(th(tbppy)py)Cl] (**11**) in CH<sub>2</sub>Cl<sub>2</sub> at 298 K (Ar-purged).

**Fig. S79** Time-resolved photoluminescence decay of [Pt(th(tbppy)py)Cl] (**11**) in a frozen glassy CH<sub>2</sub>Cl<sub>2</sub>/MeOH matrix (V:V = 1:1) at 77 K.

**Fig. S80** Excitation and emission spectra of [Pt(th(tbppy)py)CCPh] (**12**) at 298 K in CH<sub>2</sub>Cl<sub>2</sub> and at 77 K in a frozen glassy CH<sub>2</sub>Cl<sub>2</sub>/MeOH matrix (V:V = 1:1).

**Fig. S81** Time-resolved photoluminescence decay of [Pt(th(tbppy)py)CCPh] (**12**) in CH<sub>2</sub>Cl<sub>2</sub> at 298 K (air-equilibrated).

**Fig. S82** Time-resolved photoluminescence decay of [Pt(th(tbppy)py)CCPh] (**12**) in CH<sub>2</sub>Cl<sub>2</sub> at 298 K (Ar-purged).

**Fig. S83** Time-resolved photoluminescence decay of [Pt(th(tbppy)py)CCPh] (**12**) in a frozen glassy CH<sub>2</sub>Cl<sub>2</sub>/MeOH matrix (V:V = 1:1) at 77 K.

**Fig. S84** Excitation and emission spectra of [Pt(th(tbppy)py)CCcF<sub>5</sub>] (**13**) at 298 K in CH<sub>2</sub>Cl<sub>2</sub> and at 77 K in a frozen glassy CH<sub>2</sub>Cl<sub>2</sub>/MeOH matrix (V:V = 1:1).

**Fig. S85** Time-resolved photoluminescence decay of [Pt(th(tbppy)py)CCcF<sub>5</sub>] (**13**) in CH<sub>2</sub>Cl<sub>2</sub> at 298 K (air-equilibrated).

**Fig. S86** Time-resolved photoluminescence decay of [Pt(th(tbppy)py)CCcF<sub>5</sub>] (**13**) in CH<sub>2</sub>Cl<sub>2</sub> at 298 K (Ar-purged).

**Fig. S87** Time-resolved photoluminescence decay of [Pt(th(tbppy)py)CCcF<sub>5</sub>] (**13**) in a frozen glassy CH<sub>2</sub>Cl<sub>2</sub>/MeOH matrix (V:V = 1:1) at 77 K.

**Fig. S88** Excitation and emission spectra of [Pt(bth(ppy)py)Cl] (**14**) at 298 K in CH<sub>2</sub>Cl<sub>2</sub> and at 77 K in a frozen glassy CH<sub>2</sub>Cl<sub>2</sub>/MeOH matrix (V:V = 1:1).

**Fig. S89** Time-resolved photoluminescence decay of [Pt(bth(ppy)py)Cl] (**14**) in CH<sub>2</sub>Cl<sub>2</sub> at 298 K (Ar-purged).

**Fig. S90** Time-resolved photoluminescence decay of [Pt(bth(ppy)py)Cl] (**14**) in a frozen glassy CH<sub>2</sub>Cl<sub>2</sub>/MeOH matrix (V:V = 1:1) at 77 K.

**Fig. S91** Excitation and emission spectra of [Pt(bth(tbppy)py)Cl] (**15**) at 298 K in CH<sub>2</sub>Cl<sub>2</sub> and at 77 K in a frozen glassy CH<sub>2</sub>Cl<sub>2</sub>/MeOH matrix (V:V = 1:1).

**Fig. S92** Time-resolved photoluminescence decay of [Pt(bth(tbppy)py)Cl] (**15**) in CH<sub>2</sub>Cl<sub>2</sub> at 298 K (air-equilibrated).

**Fig. S93** Time-resolved photoluminescence decay of [Pt(bth(tbppy)py)Cl] (**15**) in CH<sub>2</sub>Cl<sub>2</sub> at 298 K (Ar-purged).

**Fig. S94** Time-resolved photoluminescence decay of [Pt(bth(tbppy)py)Cl] (**15**) in a frozen glassy CH<sub>2</sub>Cl<sub>2</sub>/MeOH matrix (V:V = 1:1) at 77 K.

**Fig. S95** Excitation and emission spectra of [Pt(bth(tbppy)py)CCPh] (**16**) at 298 K in CH<sub>2</sub>Cl<sub>2</sub> and at 77 K in a frozen glassy CH<sub>2</sub>Cl<sub>2</sub>/MeOH matrix (V:V = 1:1).

**Fig. S96** Time-resolved photoluminescence decay of [Pt(bth(tbppy)py)CCPh] (**16**) in CH<sub>2</sub>Cl<sub>2</sub> at 298 K (air-equilibrated).

**Fig. S97** Time-resolved photoluminescence decay of [Pt(bth(tbppy)py)CCPh] (**16**) in CH<sub>2</sub>Cl<sub>2</sub> at 298 K (Ar-purged).

**Fig. S98** Time-resolved photoluminescence decay of [Pt(bth(tbppy)py)CCPh] (**16**) in a frozen glassy CH<sub>2</sub>Cl<sub>2</sub>/MeOH matrix (V:V = 1:1) at 77 K.

**Fig. S99** Excitation and emission spectra of [Pt(th(tbppy)tz)Cl] (**17**) at 298 K in CH<sub>2</sub>Cl<sub>2</sub> and at 77 K in a frozen glassy CH<sub>2</sub>Cl<sub>2</sub>/MeOH matrix (V:V = 1:1).

**Fig. S100** Time-resolved photoluminescence decay of [Pt(th(tbppy)tz)Cl] (**17**) in CH<sub>2</sub>Cl<sub>2</sub> at 298 K (air-equilibrated).

**Fig. S101** Time-resolved photoluminescence decay of [Pt(th(tbppy)tz)Cl] (**17**) in CH<sub>2</sub>Cl<sub>2</sub> at 298 K (Ar-purged).

**Fig. S102** Time-resolved photoluminescence decay of [Pt(th(tbpppy)tz)Cl] (**17**) in a frozen glassy CH<sub>2</sub>Cl<sub>2</sub>/MeOH matrix (V:V = 1:1) at 77 K.

**Fig. S103** Excitation and emission spectra of [Pt(th(tbpppy)tz)CCPh] (**18**) at 298 K in CH<sub>2</sub>Cl<sub>2</sub> and at 77 K in a frozen glassy CH<sub>2</sub>Cl<sub>2</sub>/MeOH matrix (V:V = 1:1).

**Fig. S104** Time-resolved photoluminescence decay of [Pt(th(tbpppy)tz)CCPh] (**18**) in CH<sub>2</sub>Cl<sub>2</sub> at 298 K (air-equilibrated).

**Fig. S105** Time-resolved photoluminescence decay of [Pt(th(tbpppy)tz)CCPh] (**18**) in CH<sub>2</sub>Cl<sub>2</sub> at 298 K (Ar-purged).

**Fig. S106** Time-resolved photoluminescence decay of [Pt(th(tbpppy)tz)CCPh] (**18**) in a frozen glassy CH<sub>2</sub>Cl<sub>2</sub>/MeOH matrix (V:V = 1:1) at 77 K.

**Fig. S107** TD-DFT-calculated emission spectra (THEO, red) compared to experimental spectra at 77 K (EXP, black). Theoretical 0–0 transitions are shown as vertical dashed green lines. Upper panel: complex **1** [Pt(ph(ppy)tz)Cl]. Lower panel complex **2** [Pt(ph(tbpppy)tz)Cl].

**Fig. S108** TD-DFT-calculated emission spectra (THEO, red) compared to experimental spectra (EXP, black) for complexes of **class A** at 77 K. Theoretical 0–0 transitions are shown as vertical dashed green lines. Upper panel: complex **3** [Pt(ph(tbpppy)tz)C≡CPh]. Middle panel: complex **2** [Pt(ph(tbpppy)tz)Cl]. Lower panel: complex **4** [Pt(ph(tbpppy)tz)C≡CC<sub>6</sub>F<sub>5</sub>].

**Fig. S109** TD-DFT-calculated emission spectra (THEO, red) of **class B** complexes compared to experimental spectra (EXP, black) at 77 K. Calculated 0–0 transitions are shown as vertical dashed green lines. Upper panel: complex **12** [Pt(th(tbpppy)py)C≡CPh]. Middle panel: complex **11** [Pt(th(tbpppy)py)Cl]. Lower panel: complex **13** [Pt(th(tbpppy)py)C≡CC<sub>6</sub>F<sub>5</sub>].

**Fig. S110** Left: Decomposition of the emissive *T*<sub>1</sub> states into MLCT, LMCT, LC, LLCT, and MC contributions of complexes **3**, **6**, **9** (top), and **12**, **16**, **18** (bottom). Right: Molecular partitioning used for the example of complex **3**, all other complexes were partitioned in an analogous manner.

**Fig. S111** Decomposition of the emissive *T*<sub>1</sub> states into MLCT, LMCT, LC, LLCT, and MC contributions of [Pt(ph(ppy)tz)Cl] (**1**) and [Pt(ph(tbpppy)tz)Cl] (**2**).

**Fig. S112** Decomposition of the emissive *T*<sub>1</sub> states into MLCT, LMCT, LC, LLCT, and MC contributions for **class A** complexes (**3**) [Pt(ph(tbpppy)tz)CCPh], (**2**) [Pt(ph(tbpppy)tz)Cl], and (**4**) [Pt(ph(tbpppy)tz)CC<sub>6</sub>F<sub>5</sub>].

**Fig. S113** Decomposition of the emissive *T*<sub>1</sub> states into MLCT, LMCT, LC, LLCT, and MC contributions for **class B** complexes (**12**) [Pt(th(tbpppy)py)C≡CPh], (**11**) [Pt(th(tbpppy)py)Cl], and (**13**) [Pt(th(tbpppy)py)C≡CC<sub>6</sub>F<sub>5</sub>].

**Fig. S114** Molecular orbitals of complex (**1**) with the largest contributions to the emissive *T*<sub>1</sub> state.

**Fig. S115** Molecular orbitals of complex (**3**) with the largest contributions to the emissive *T*<sub>1</sub> state.

**Fig. S116** Molecular orbitals of complex (**4**) with the largest contributions to the emissive *T*<sub>1</sub> state.

**Fig. S117** Molecular orbitals of complex (**9**) with the largest contributions to the emissive *T*<sub>1</sub> state.

**Fig. S118** Molecular orbitals of complex (**11**) with the largest contributions to the emissive *T*<sub>1</sub> state.

**Fig. S119** Molecular orbitals of complex (**12**) with the largest contributions to the emissive *T*<sub>1</sub> state.

**Fig. S120** Molecular orbitals of complex (**16**) with the largest contributions to the emissive *T*<sub>1</sub> state.

**Fig. S121** Molecular orbitals of complex (**18**) with the largest contributions to the emissive *T*<sub>1</sub> state.

## Supporting Tables

**Table S1** Selected structure solution and refinement data for [Pt(th(ppy)py)Cl]·CH<sub>2</sub>Cl<sub>2</sub> (**10**·CH<sub>2</sub>Cl<sub>2</sub>) and [Pt(ph(tbpppy)btz)(CCPh)] (**9**).

**Table S2** Selected structural data for [Pt(th(ppy)py)Cl]·CH<sub>2</sub>Cl<sub>2</sub> (**10**·CH<sub>2</sub>Cl<sub>2</sub>) and [Pt(ph(tbpppy)btz)(CCPh)] (**9**).

**Table S3** Redox potentials of the HC<sup>^</sup>N<sup>^</sup>N protoligands.

**Table S4** Redox potentials of the [Pt(C<sup>^</sup>N<sup>^</sup>N)X] complexes.

**Table S5** UV-vis absorption maxima of HC<sup>^</sup>N<sup>^</sup>N protoligands.

**Table S6** UV-vis absorption maxima of the [Pt(C<sup>^</sup>N<sup>^</sup>N)X] complexes.

**Table S7** Complete emission data and PLYQs and excited state lifetime data in CH<sub>2</sub>Cl<sub>2</sub> (298 K) and in frozen glassy CH<sub>2</sub>Cl<sub>2</sub>/MeOH matrix at 77 K.

**Table S8** TDDFT calculated transitions contributing to the emissive *T*<sub>1</sub> state.

## Photophysical characterisation

Steady-state excitation and emission spectra were recorded on a FluoTime300 spectrometer from PicoQuant equipped with a 300 W ozone-free Xe lamp (250-900 nm), a 10 W Xe flash-lamp (250-900 nm, pulse width < 10  $\mu$ s) with repetition rates of 0.1 to 300 Hz, an excitation monochromator (Czerny-Turner 2.7 nm/mm dispersion, 1200 grooves/mm, blazed at 300 nm), diode lasers (pulse width < 80 ps) operated by a computer-controlled laser driver PDL-820 (repetition rate up to 80 MHz, burst mode for slow and weak decays), two emission monochromators (Czerny-Turner, selectable gratings blazed at 500 nm with 2.7 nm/mm dispersion and 1200 grooves/mm, or blazed at 1250 nm with 5.4 nm/mm dispersion and 600 grooves/mm), Glan-Thompson polarisers for excitation (Xe-lamps) and emission, a Peltier-thermostated sample holder from Quantum Northwest (-40  $^{\circ}$ C to 105  $^{\circ}$ C), and two detectors, a PMA Hybrid 40 (transit time spread FWHM < 120 ps, 300 to 720 nm) and a R5509-42 NIR-photomultiplier tube (transit time spread FWHM 1.5 ns, 300-1400 nm) with external cooling (-80  $^{\circ}$ C) from Hamamatsu.

Steady-state and fluorescence lifetimes were recorded in TCSPC mode by a PicoHarp 300 (minimum base resolution 4 ps).

Phosphorescence lifetimes were recorded in MCS mode by a TimeHarp 300 (minimum base resolution 250 ps). Emission and excitation spectra were corrected for source intensity (lamp and grating) by standard correction curves.

Lifetime analysis was performed using the commercial FluoFit software. The quality of the fit was assessed by minimizing the reduced chi squared function ( $\chi^2$ ) and visual inspection of the weighted residuals and their autocorrelation.

Luminescence quantum yields (PLQY) were measured with a Hamamatsu Photonics absolute PL quantum yield measurement system (C9920-02) equipped with a L9799-01 CW Xenon light source (150 W), monochromator, C7473 photonic multi-channel analyser, integrating sphere and employing U6039-05 PLQY measurement software (Hamamatsu Photonics, Ltd., Shizuoka, Japan). The used dichloromethane was of spectroscopic grade (Uvasol<sup>®</sup>).

### Supporting Figures

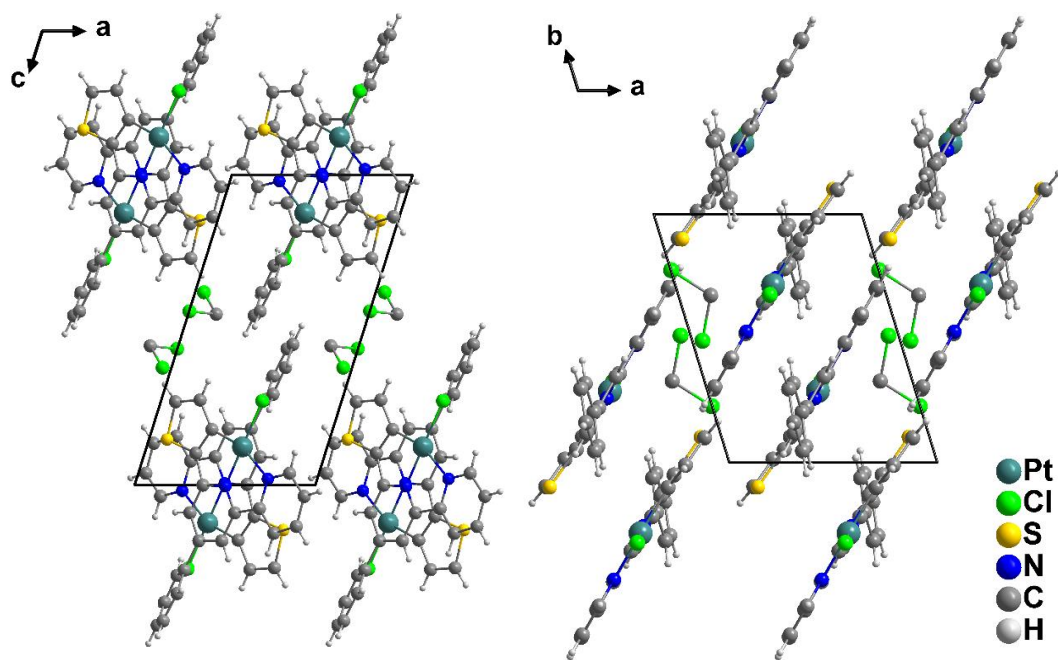

**Fig. S1** Crystal structure of [Pt(th(ppy)py)Cl]·CD<sub>2</sub>Cl<sub>2</sub> (10·CH<sub>2</sub>Cl<sub>2</sub>) viewed along the crystallographic *b* (left) and *c* (right) axes.

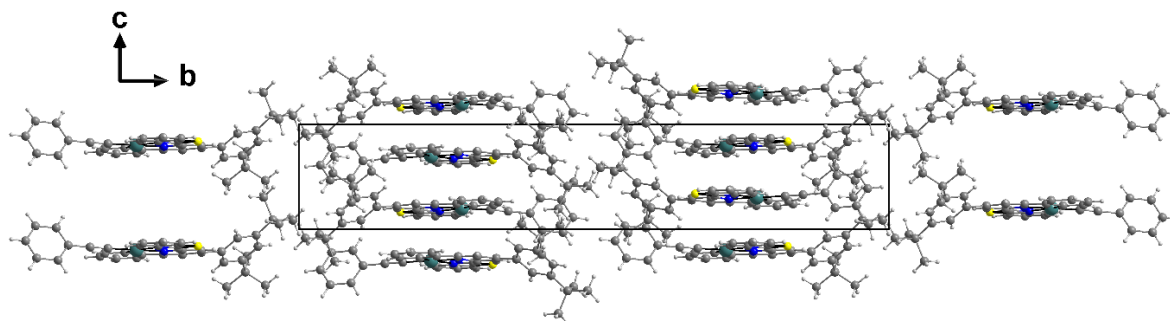

Fig. S2 Crystal structure of [Pt(ph(tbppy)bzt)CCPh] (9) viewed along the crystallographic *a* axis.

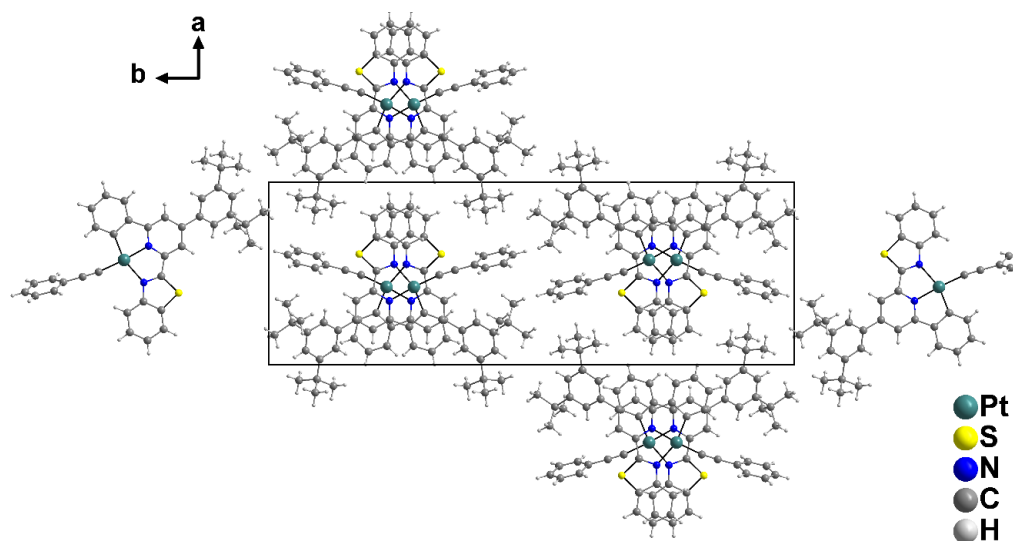

Fig. S3 Crystal structure of [Pt(ph(tbppy)bzt)CCPh] (9) viewed along the crystallographic *c* axis.

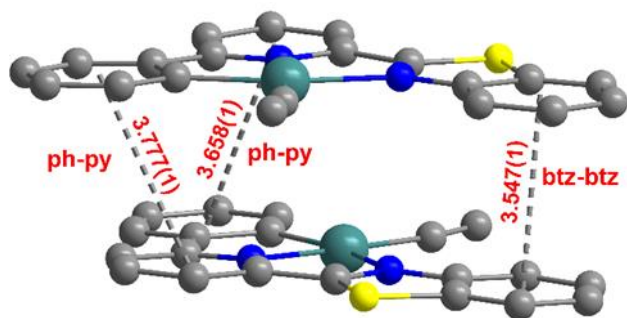

Fig. S4 Intermolecular  $\pi$ -stacking interactions in [Pt(ph(tbppy)bzt)CCPh] (9).

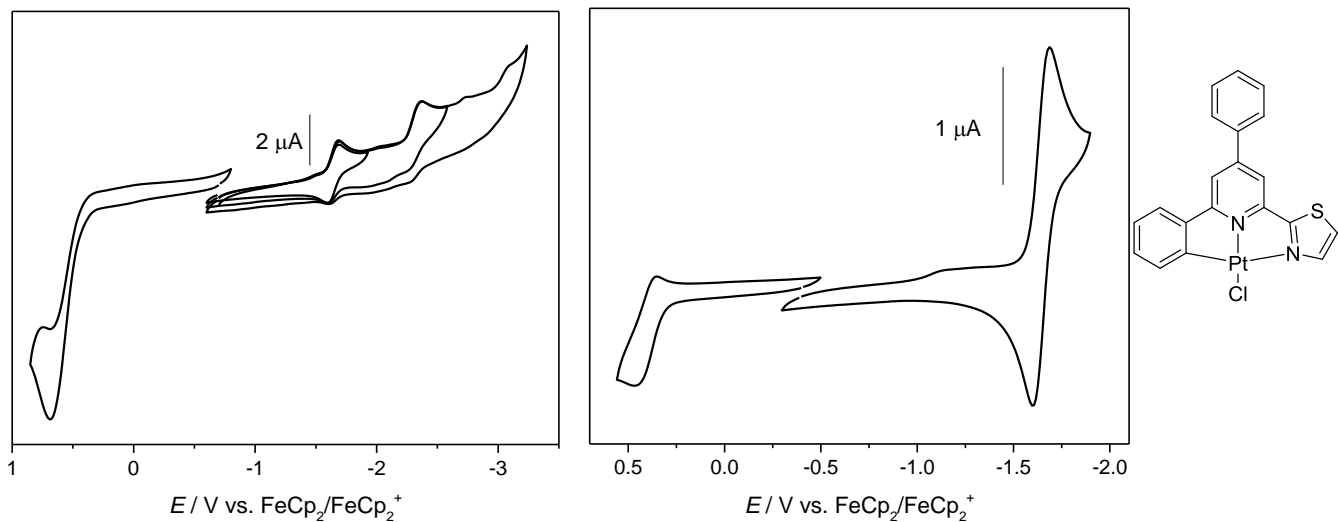

**Fig. S5** Cyclic voltammograms of [Pt(ph(ppy)tz)Cl] (**1**) in 0.1 M *n*Bu<sub>4</sub>NPF<sub>6</sub>/THF (left) and 0.1 M /CH<sub>2</sub>Cl<sub>2</sub> (right, Pt working electrode).

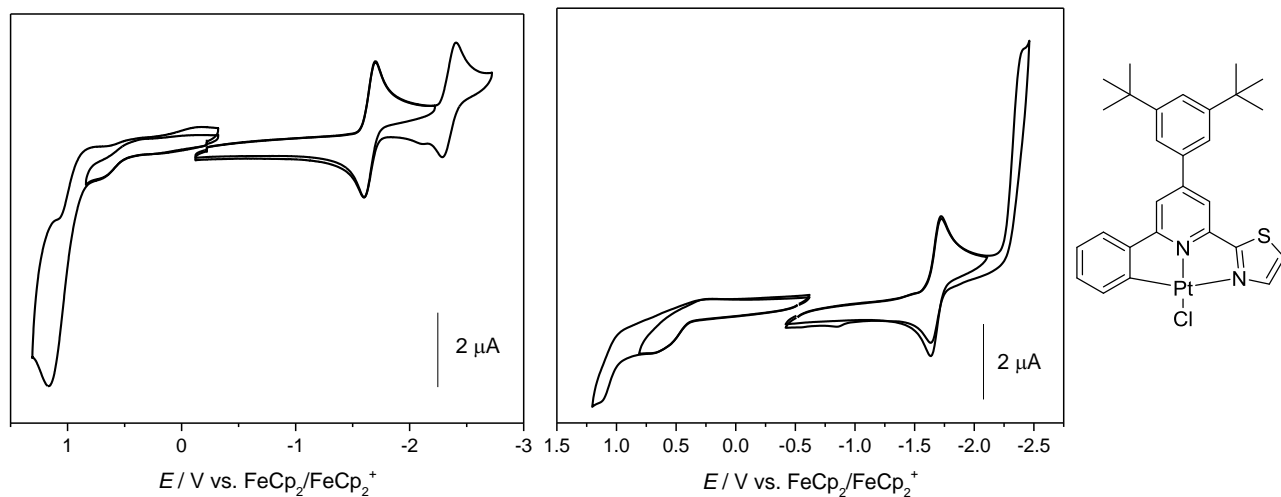

**Fig. S6** Cyclic voltammograms of [Pt(ph(tbbpy)tz)Cl] (**2**) in 0.1 M *n*Bu<sub>4</sub>NPF<sub>6</sub>/THF (left) and /CH<sub>2</sub>Cl<sub>2</sub> (right).

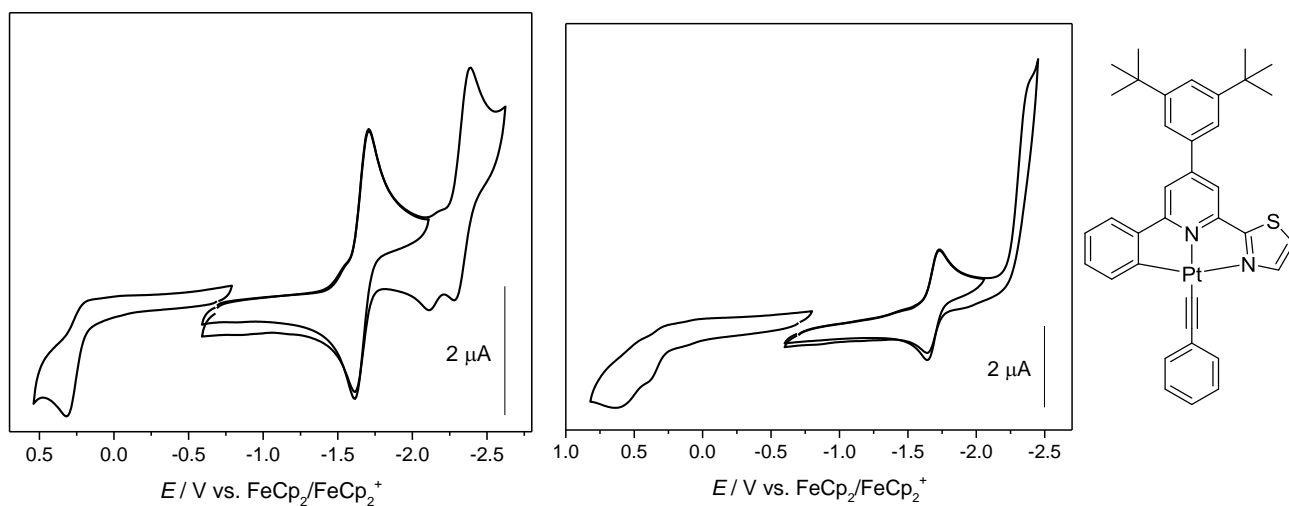

**Fig. S7** Cyclic voltammograms of [Pt(ph(tbbpy)tz)(CCPh)] (**3**) in 0.1 M *n*Bu<sub>4</sub>NPF<sub>6</sub>/THF (left) and /CH<sub>2</sub>Cl<sub>2</sub> (right).

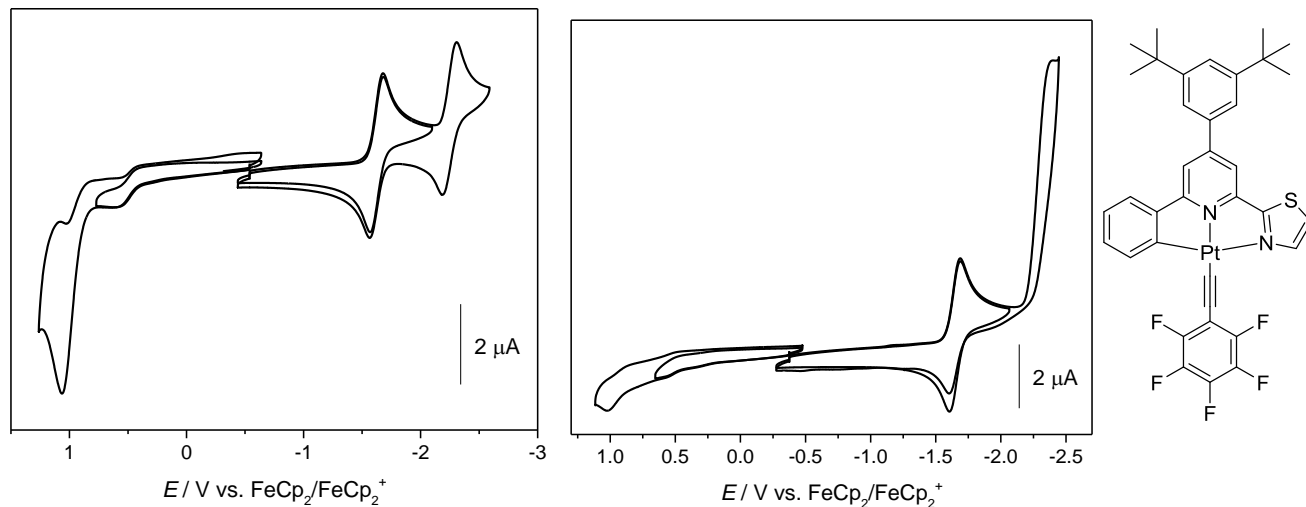

**Fig. S8** Cyclic voltammograms of [Pt(ph(tbppy)tz)(CCCF<sub>5</sub>)] (**4**) in 0.1 M *n*Bu<sub>4</sub>NPF<sub>6</sub>/THF (left) and /CH<sub>2</sub>Cl<sub>2</sub> (right).

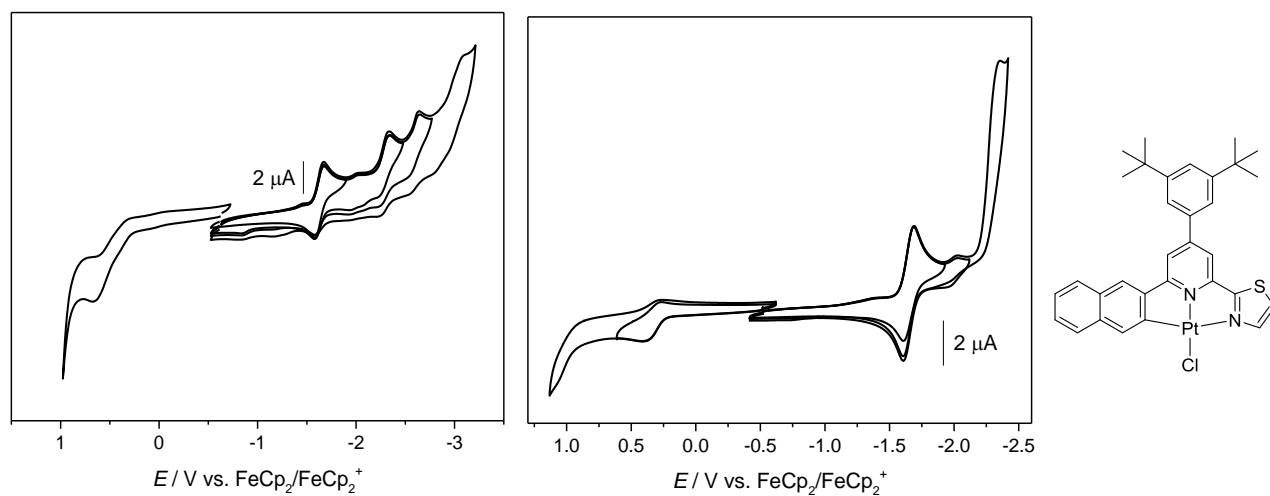

**Fig. S9** Cyclic voltammograms of [Pt(na(tbppy)tz)Cl] (**5**) in 0.1 M *n*Bu<sub>4</sub>NPF<sub>6</sub>/THF (left) and /CH<sub>2</sub>Cl<sub>2</sub> (right).

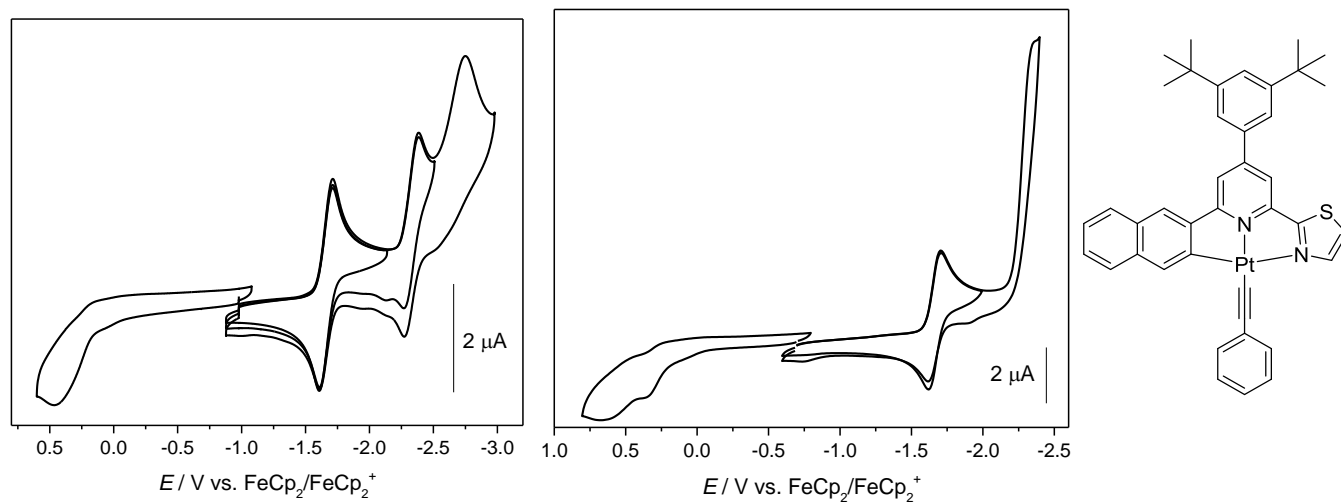

**Fig. S10** Cyclic voltammograms of [Pt(na(tbppy)tz)(CCPh)] (**6**) in 0.1 M *n*Bu<sub>4</sub>NPF<sub>6</sub>/THF (left) and /CH<sub>2</sub>Cl<sub>2</sub> (right).



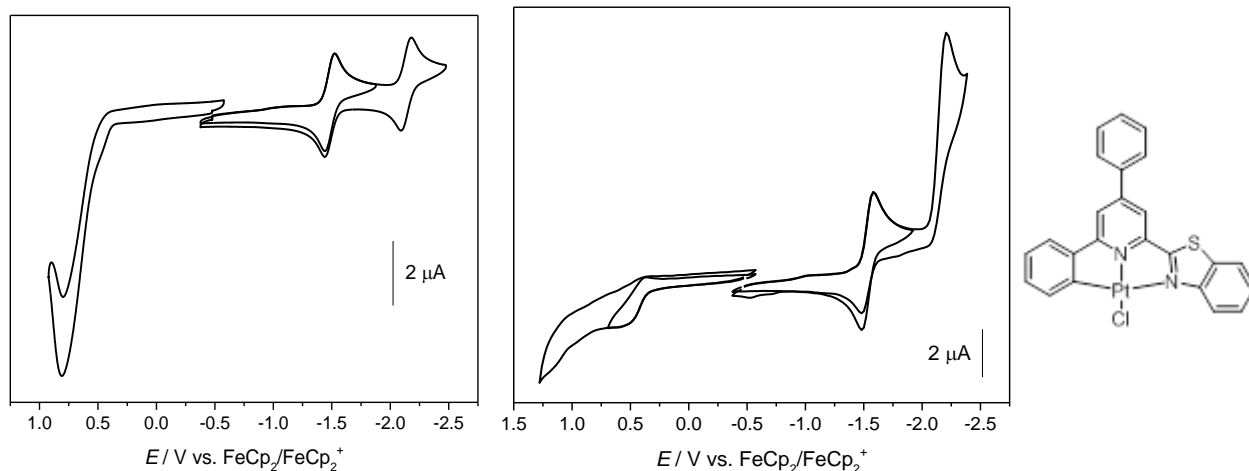

**Fig. S11** Cyclic voltammograms of [Pt(ph(ppy)btz)Cl] (7) in 0.1 M *n*Bu<sub>4</sub>NPF<sub>6</sub>/THF (left) and /CH<sub>2</sub>Cl<sub>2</sub> (right).

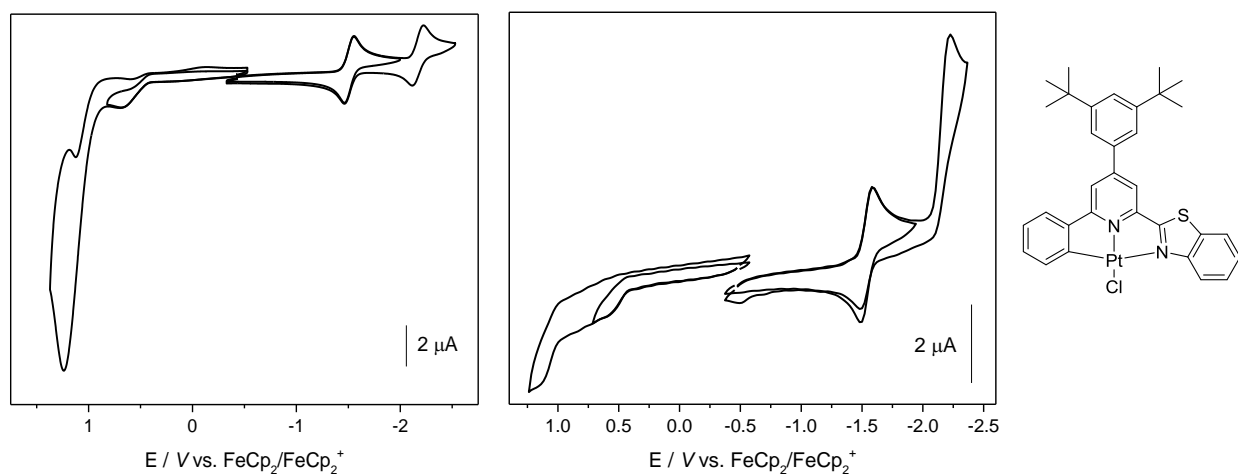

**Fig. S12** Cyclic voltammograms of [Pt(ph(tbppy)btz)Cl] (8) in 0.1 M *n*Bu<sub>4</sub>NPF<sub>6</sub>/THF (left) and /CH<sub>2</sub>Cl<sub>2</sub> (right).

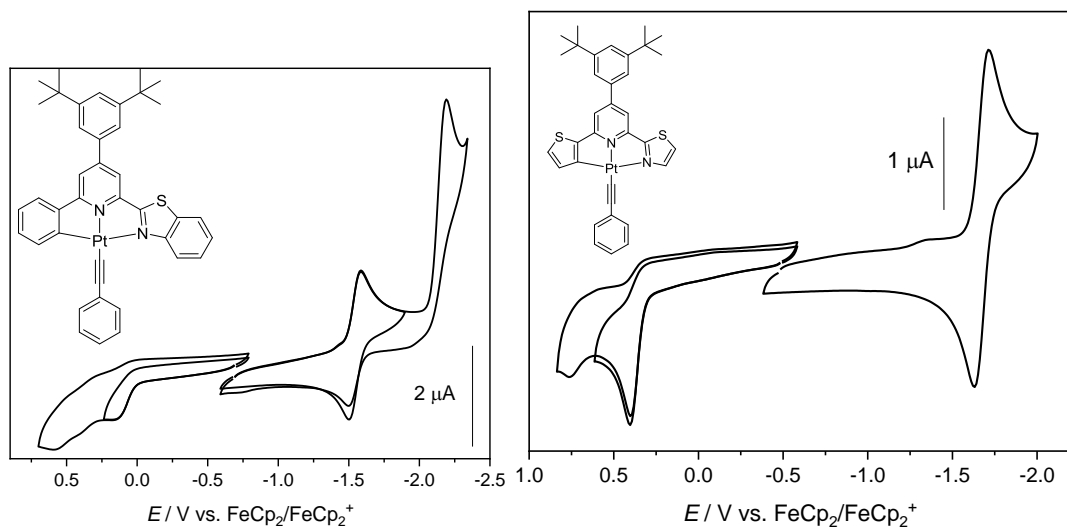

**Fig. S13** Cyclic voltammograms of [Pt(ph(tbppy)btz)(CCPh)] (9) (left) and [Pt(th(tbppy)tz)(CCPh)] (18) (right) in 0.1 M *n*Bu<sub>4</sub>NPF<sub>6</sub>/CH<sub>2</sub>Cl<sub>2</sub>.

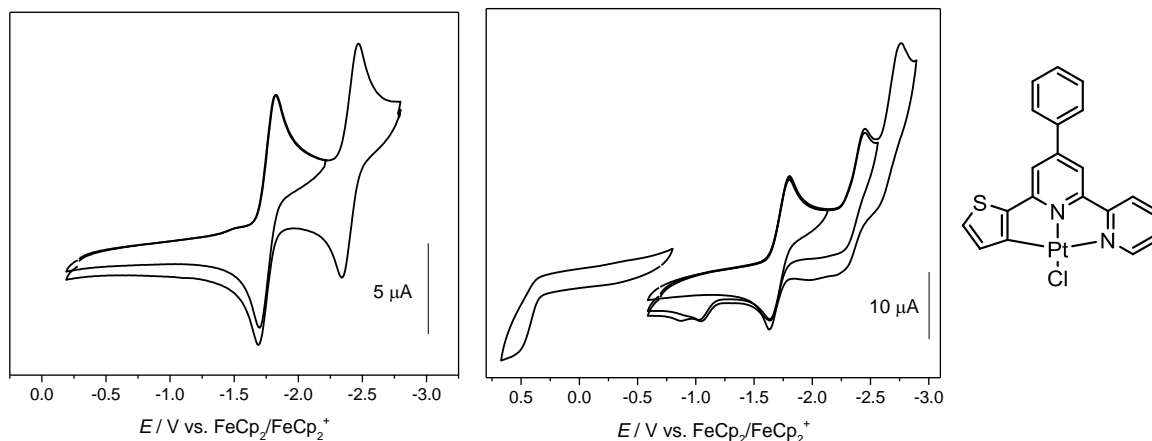

**Fig. S14** Cyclic voltammograms of [Pt(th(tpy)py)Cl] (**10**) in 0.1 M *n*Bu<sub>4</sub>NPF<sub>6</sub>/THF (left) and /DMF (right).

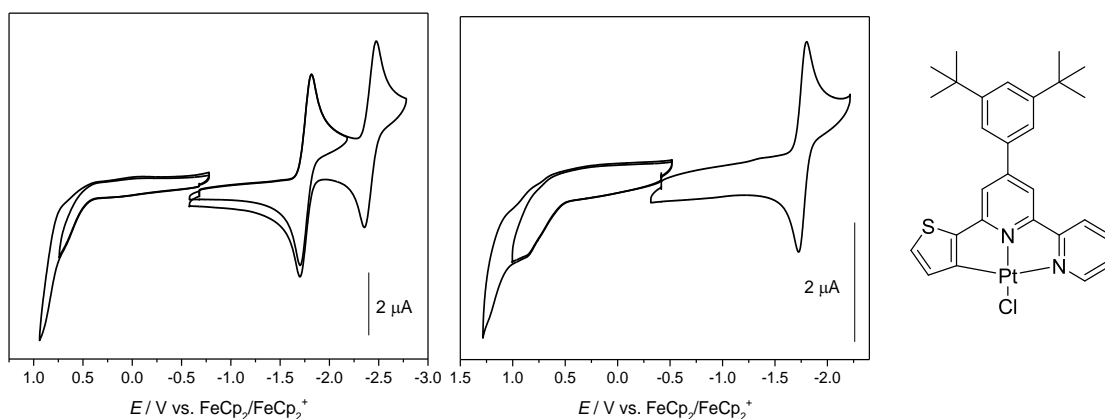

**Fig. S15** Cyclic voltammograms of [Pt(th(tbbpy)py)Cl] (**11**) in 0.1 M *n*Bu<sub>4</sub>NPF<sub>6</sub>/THF (left) and 0.1 M /CH<sub>2</sub>Cl<sub>2</sub> (right).

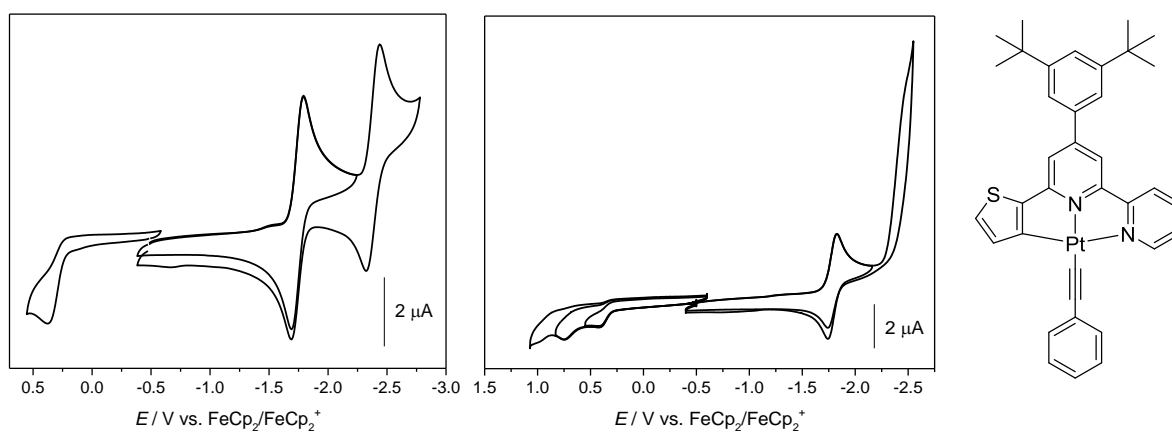

**Fig. S16** Cyclic voltammograms of [Pt(th(tbbpy)py)CCPh] (**12**) in 0.1 M *n*Bu<sub>4</sub>NPF<sub>6</sub>/THF (left) and /CH<sub>2</sub>Cl<sub>2</sub> (right).

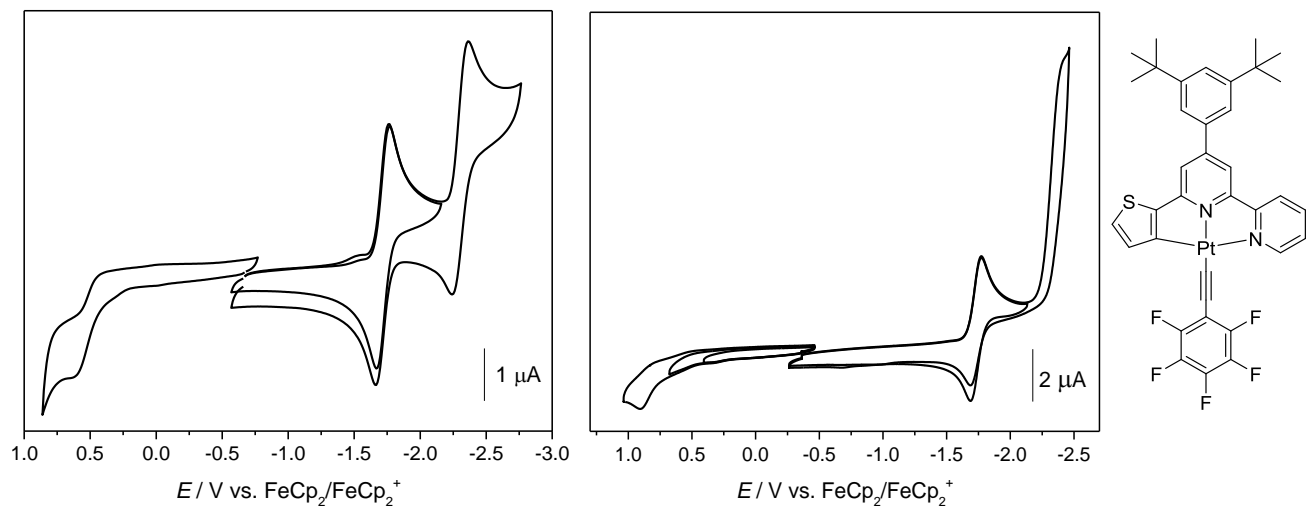

**Fig. S17** Cyclic voltammograms of [Pt(th(tbbppy)py)CCCF<sub>5</sub>] (13) in 0.1 M *n*Bu<sub>4</sub>NPF<sub>6</sub>/THF (left) and /CH<sub>2</sub>Cl<sub>2</sub> (right).

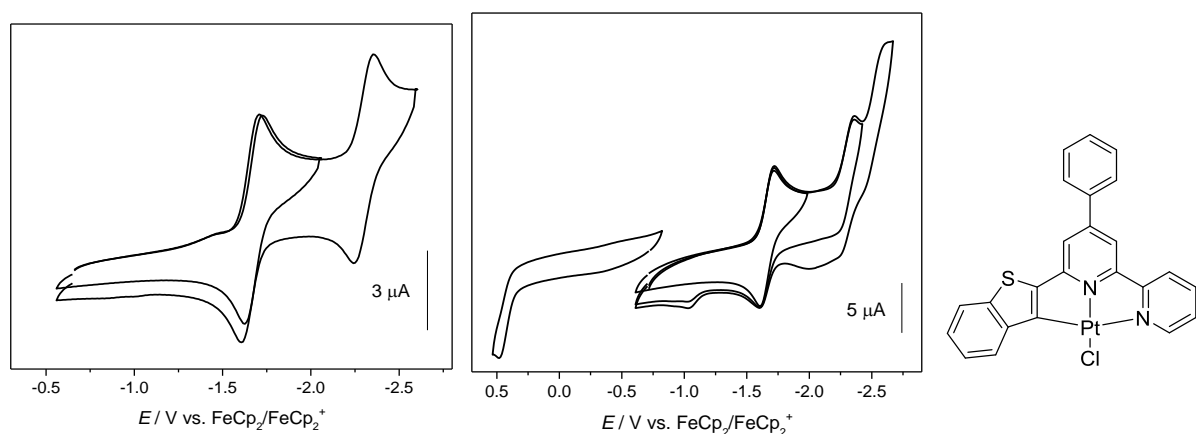

**Fig. S18** Cyclic voltammograms of [Pt(bth(ppy)py)Cl] (14) in 0.1 M *n*Bu<sub>4</sub>NPF<sub>6</sub>/THF (left) and /DMF (right).

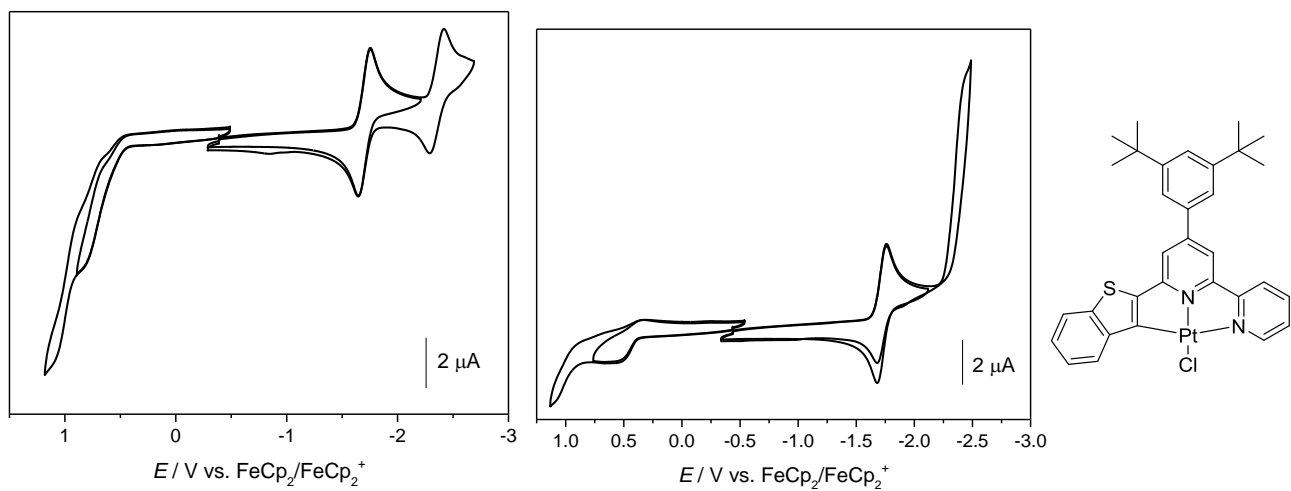

**Fig. S19** Cyclic voltammograms of [Pt(bth(tbbppy)py)Cl] (15) in 0.1 M *n*Bu<sub>4</sub>NPF<sub>6</sub>/THF (left) and /CH<sub>2</sub>Cl<sub>2</sub> (right).

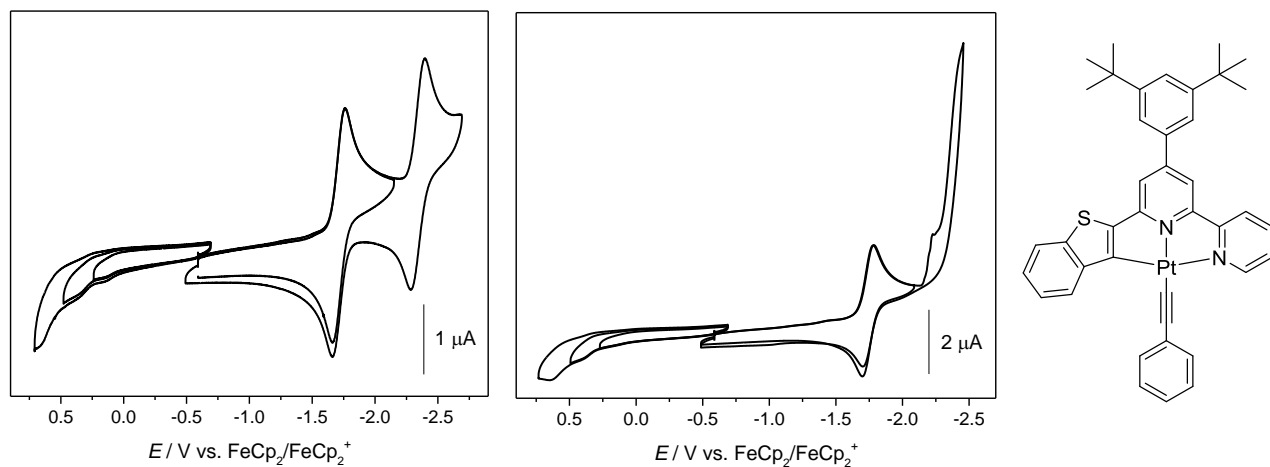

**Fig. S20** Cyclic voltammograms of [Pt(bth(tbppy)py)CCPh] (**16**) in 0.1 M *n*Bu<sub>4</sub>NPF<sub>6</sub>/THF (left) and /CH<sub>2</sub>Cl<sub>2</sub> (right).

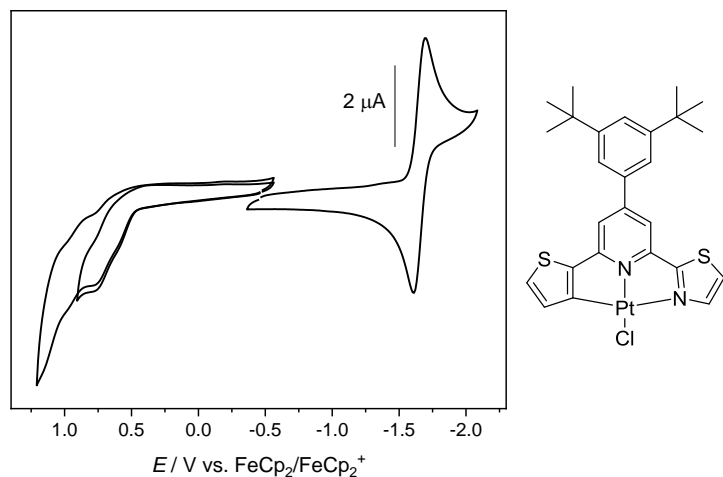

**Fig. S21** Cyclic voltammograms of [Pt(th(tbppy)tz)Cl] (**17**) in 0.1 M *n*Bu<sub>4</sub>NPF<sub>6</sub>/CH<sub>2</sub>Cl<sub>2</sub>.

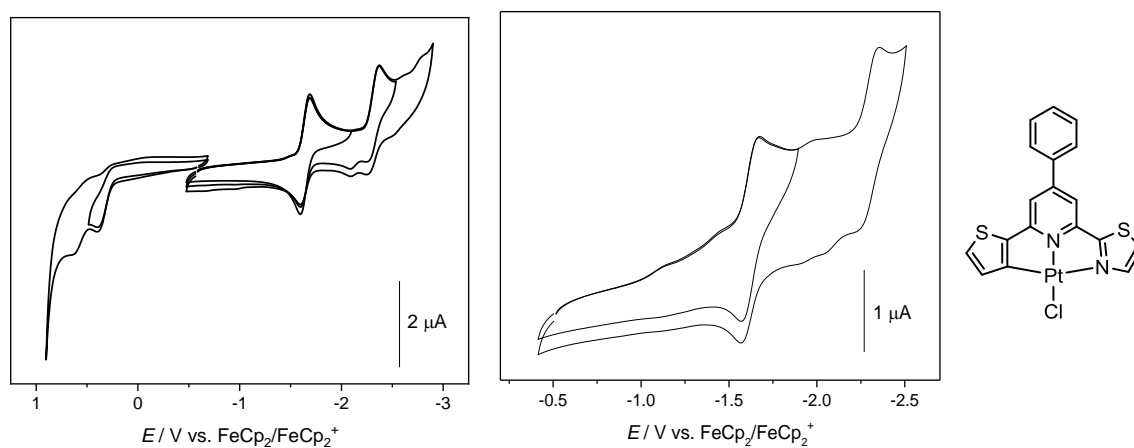

**Fig. S22** Cyclic voltammograms of [Pt(th(ppy)tz)Cl] in 0.1 M *n*Bu<sub>4</sub>NPF<sub>6</sub>/THF (left) and /CH<sub>2</sub>Cl<sub>2</sub> (right).

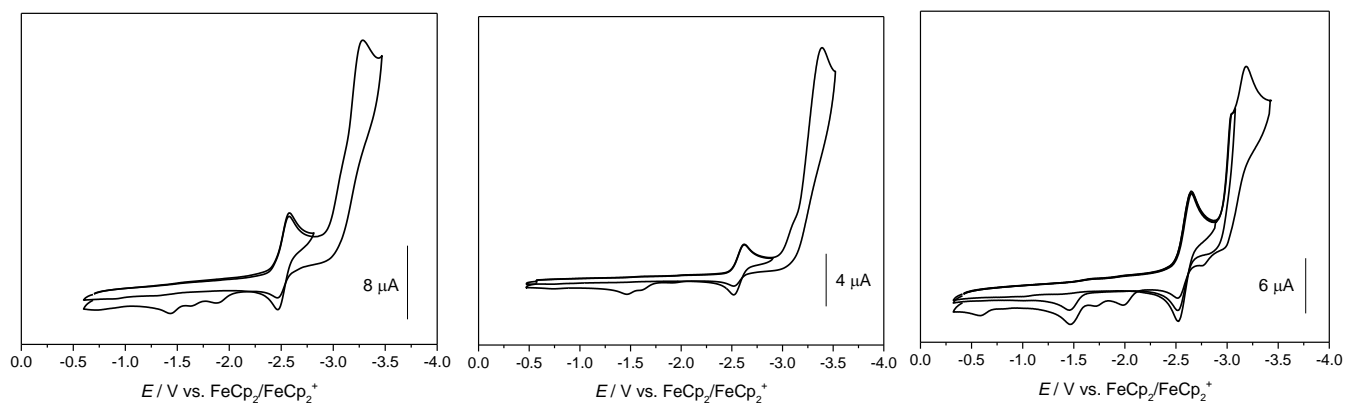

**Fig. S23** Cyclic voltammograms of Hth(ppy)py (left), Hth(tbppy)py (middle), and Hbth(ppy)py (right) in 0.1 M *n*Bu<sub>4</sub>NPF<sub>6</sub>/THF.

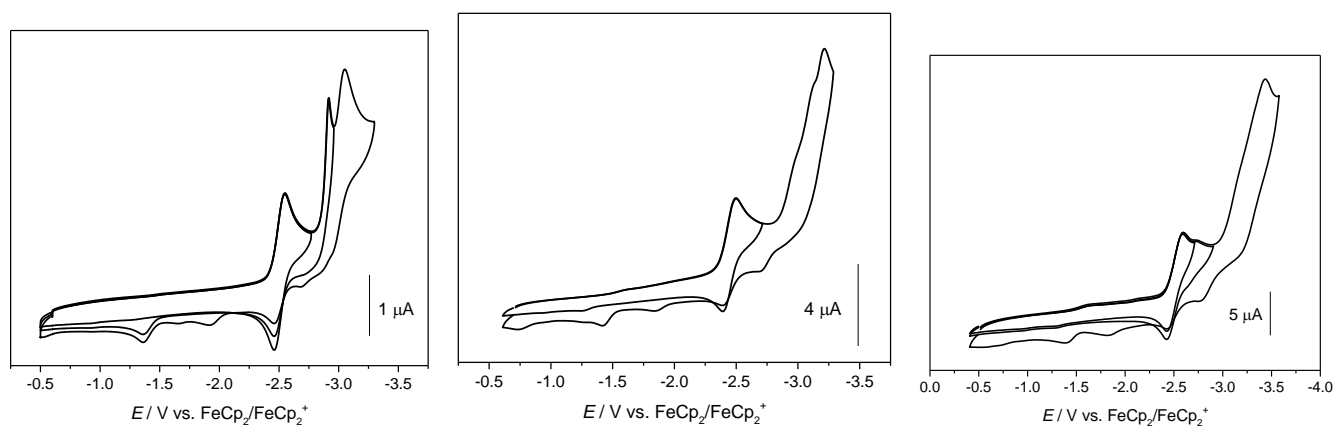

**Fig. S24** Cyclic voltammograms of Hbth(tbppy)py (left), Hph(ppy)tz (middle), and Hph(tbppy)tz (right) in 0.1 M *n*Bu<sub>4</sub>NPF<sub>6</sub>/THF.

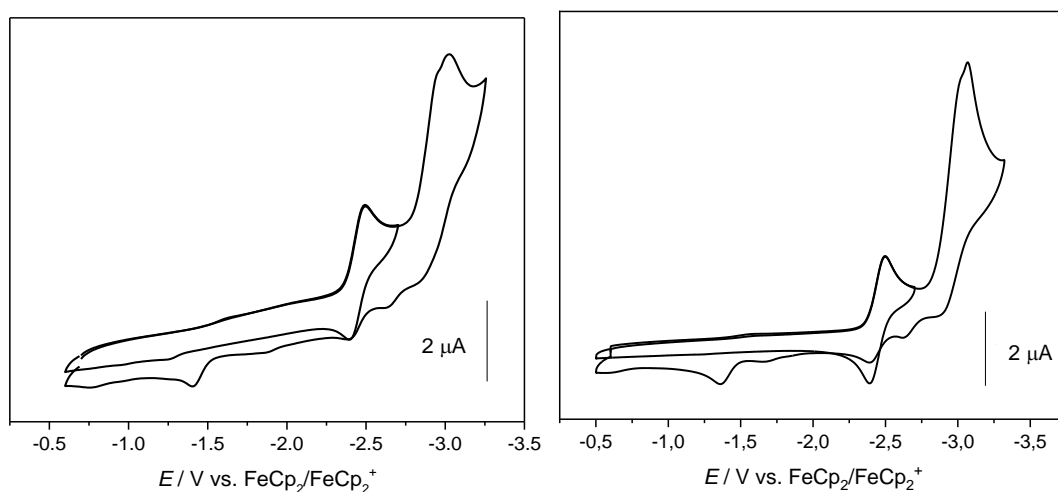

**Fig. S25** Cyclic voltammograms of Hna(ppy)tz (left) and Hna(tbppy)tz (right) in 0.1 M *n*Bu<sub>4</sub>NPF<sub>6</sub>/THF.

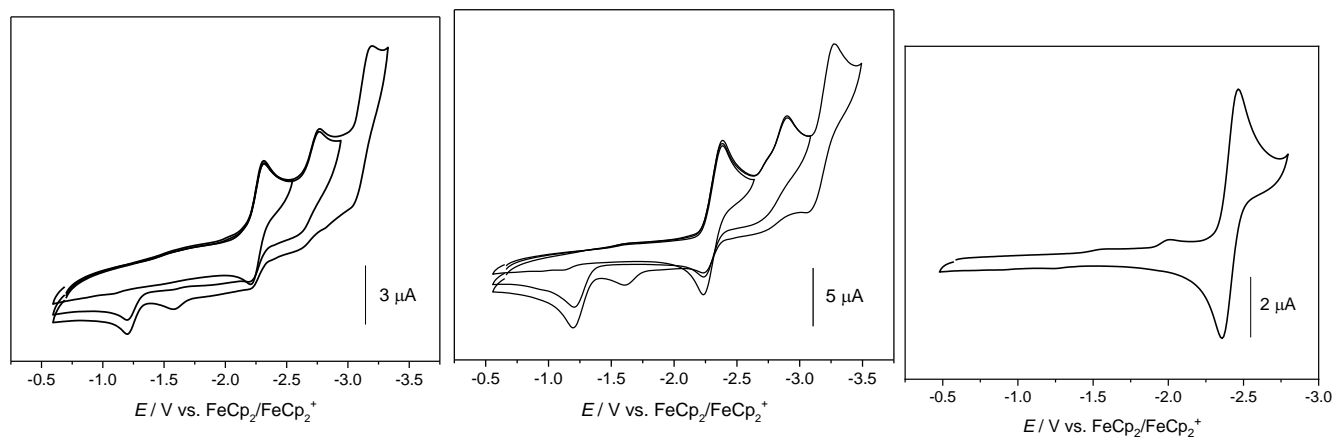

**Fig. S26** Cyclic voltammograms of Hph(ppy)btz (left), Hph(tbppy)btz (middle), and Hth(tbppy)tz (right) in 0.1 M *n*Bu<sub>4</sub>NPF<sub>6</sub>/THF.

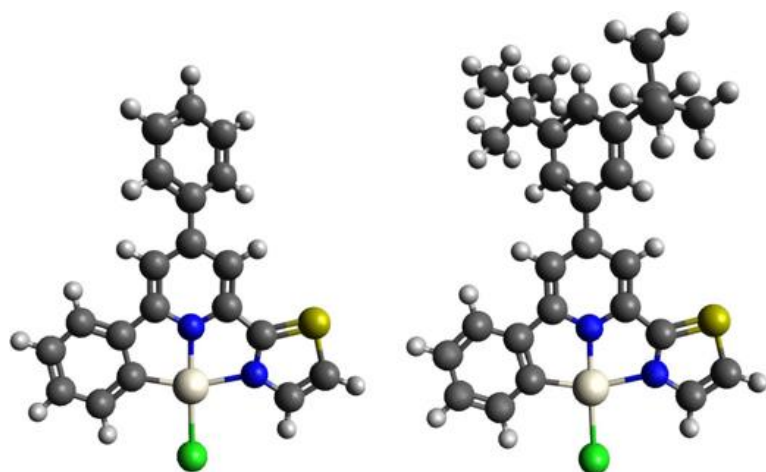

**Fig. S27** DFT-optimised geometries of complexes from **class A** with coligand X = Cl and R<sup>1</sup> = H (left) and R<sup>1</sup> = 3,5-*t*Bu<sub>2</sub> (right).

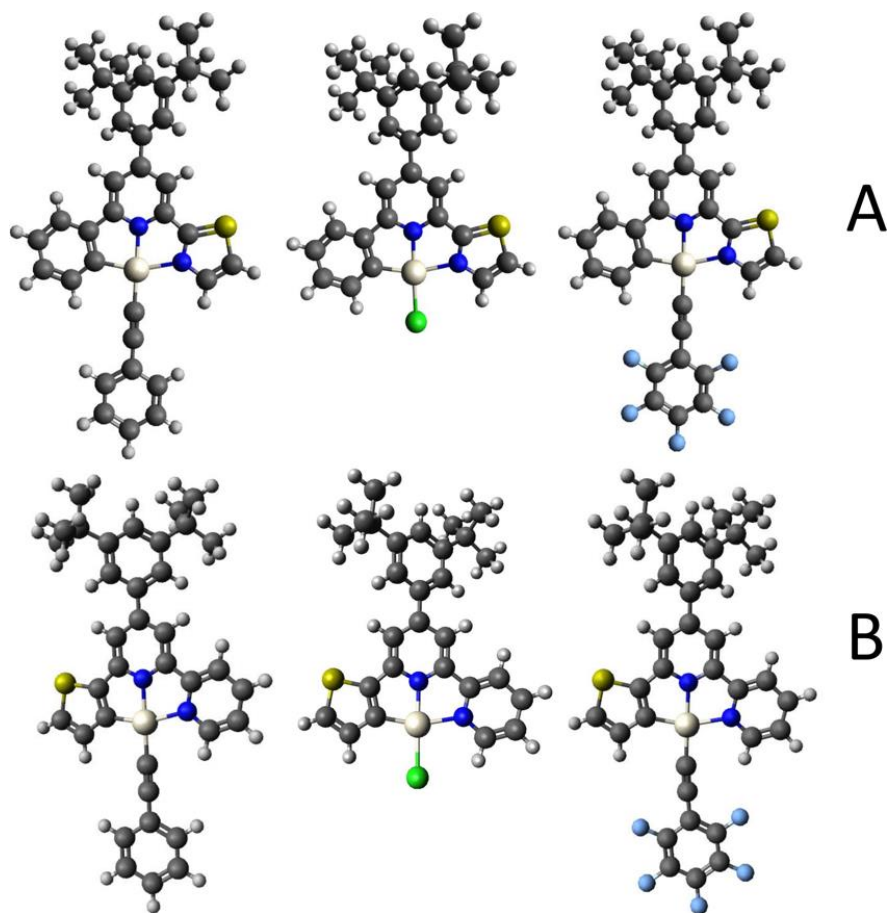

**Fig. S28** DFT-optimised geometries of complexes from **classes A and B** with coligands  $X = \text{CCPh}$ ,  $\text{Cl}$ ,  $\text{CCC}_6\text{F}_5$  (from left to right) and  $R^1 = 3,5\text{-}t\text{Bu}$ .

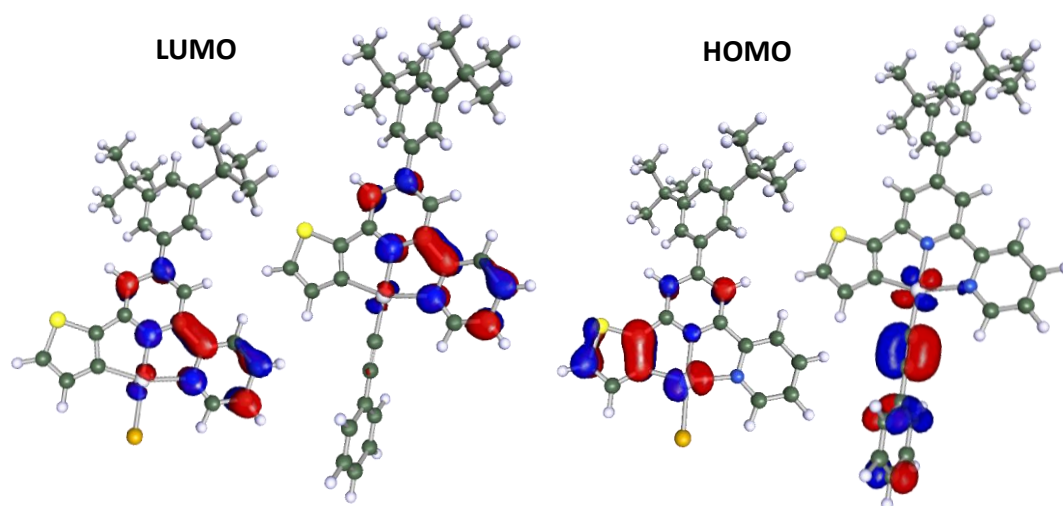

**Fig. S29** DFT-calculated compositions of the lowest unoccupied molecular orbitals (LUMO) and highest occupied molecular orbitals (HOMO) of  $[\text{Pt}(\text{th}(\text{tbpppy})\text{py})\text{Cl}]$  (**11**) and  $[\text{Pt}(\text{th}(\text{tbpppy})\text{py})(\text{CCPh})]$  (**12**) calculated on B3LYP level using def2-TZV(P) for C, H, N, S und LAN-L2DZ basis sets for Pt (ECP: Hay/Wadt ( $n = 1$ )), isosurface at 0.05.

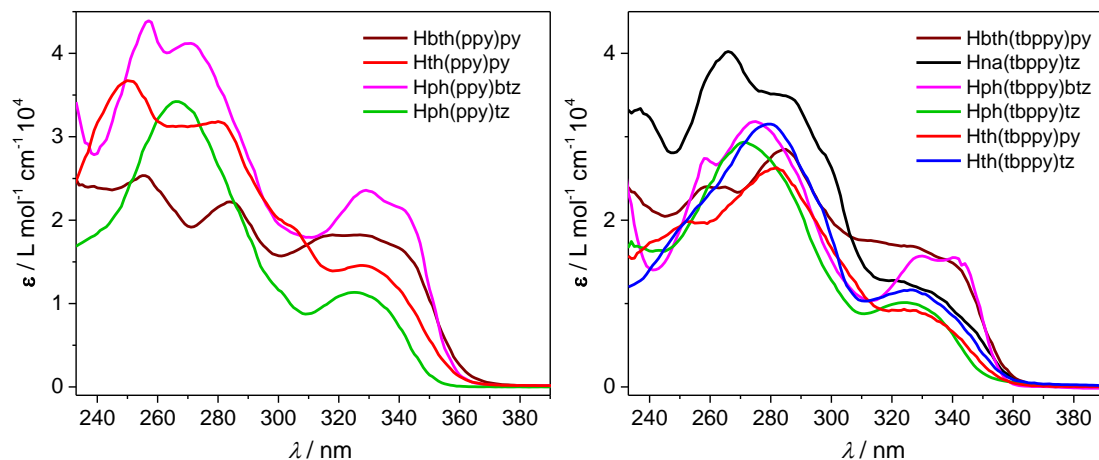

**Fig. S30** UV-vis absorption spectra of HC<sup>N</sup>N protoligands with 4-phenyl-pyridyl (Hppy) (left) and 3,5-*t*Bu<sub>2</sub>-phenyl-pyridyl (Htbppy) (right) in CH<sub>2</sub>Cl<sub>2</sub> (298 K).

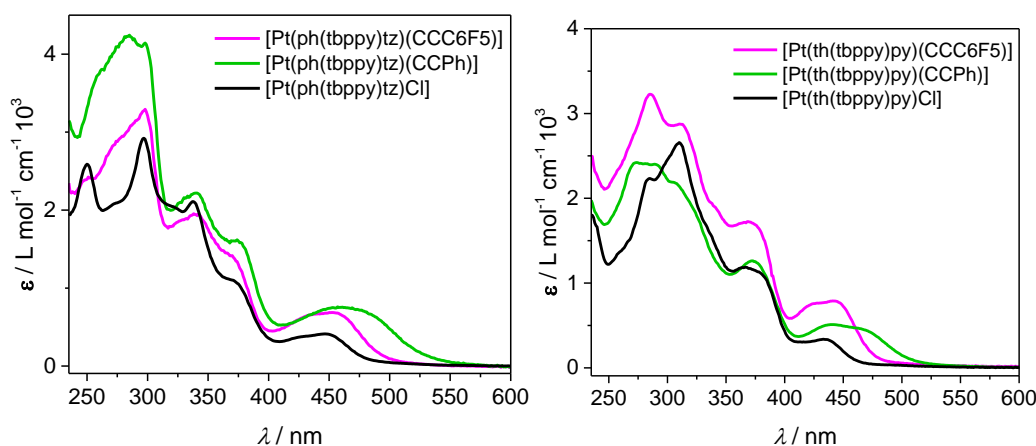

**Fig. S31** UV-vis absorption spectra of [Pt(ph(tbppy)tz)(Cl/R)] (R = CCPh, CCC<sub>6</sub>F<sub>5</sub>) (**2**, **3**, **4**) (left) and [Pt(th(tbppy)py)(Cl/R)] (R = CCPh, CCC<sub>6</sub>F<sub>5</sub>) (**11**, **12**, **13**) (right) in CH<sub>2</sub>Cl<sub>2</sub> (298 K).

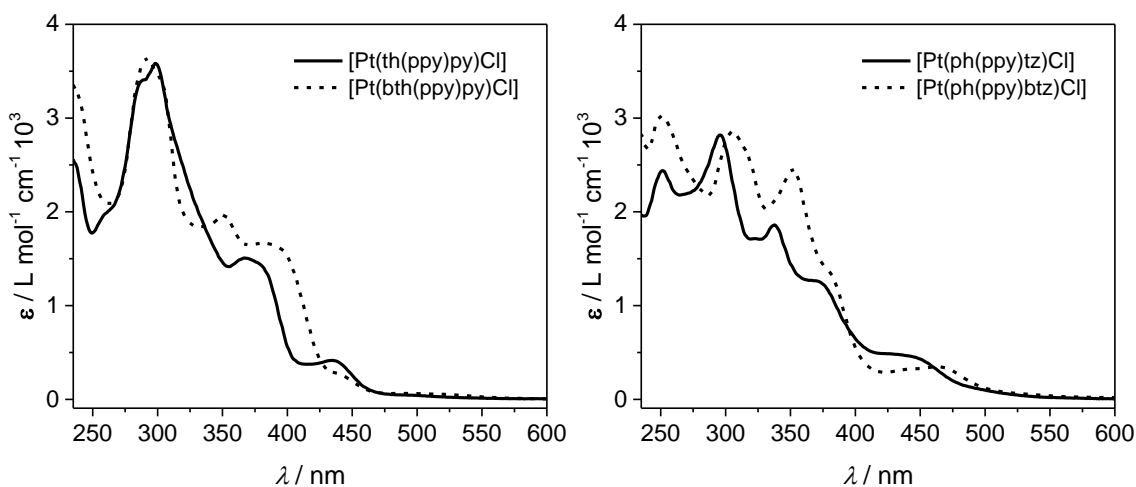

**Fig. S32** UV-vis absorption spectra of [Pt(th(ppy)py)Cl] (**10**) and [Pt(bth(ppy)py)Cl] (**14**) (left) and [Pt(ph(ppy)tz)Cl] (**1**) and [Pt(ppy)btz)Cl] (**7**) (right) in CH<sub>2</sub>Cl<sub>2</sub> (298 K).



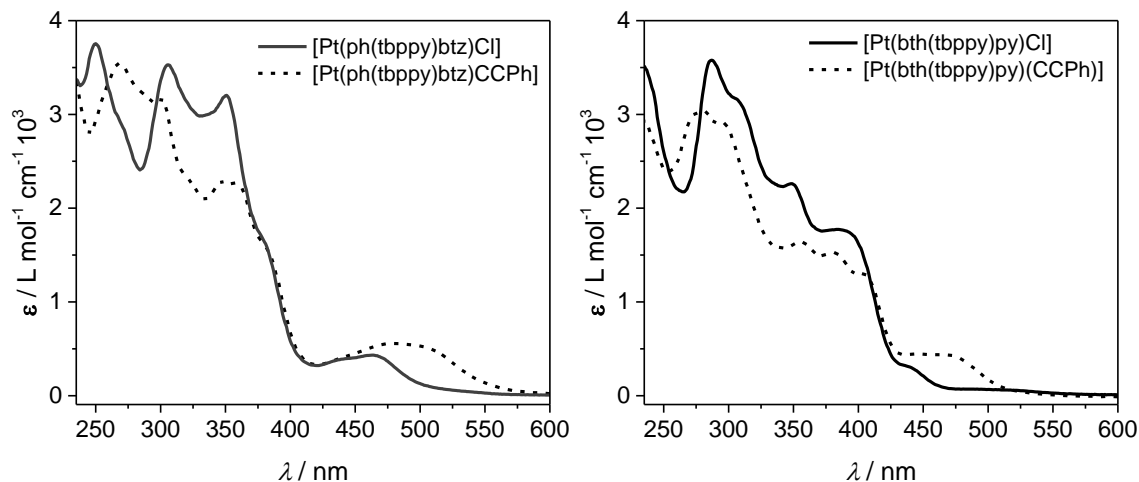

Fig. S33 UV-vis absorption spectra of [Pt(ph(tbppy)btz)Cl] (**8**) and [Pt(ph(tbppy)btz)(CCPh)] (**9**) (left) and [Pt(bth(tbppy)py)Cl] (**15**) and [Pt(bth(tbppy)py)(CCPh)] (**16**) (right) in  $\text{CH}_2\text{Cl}_2$  (298 K).

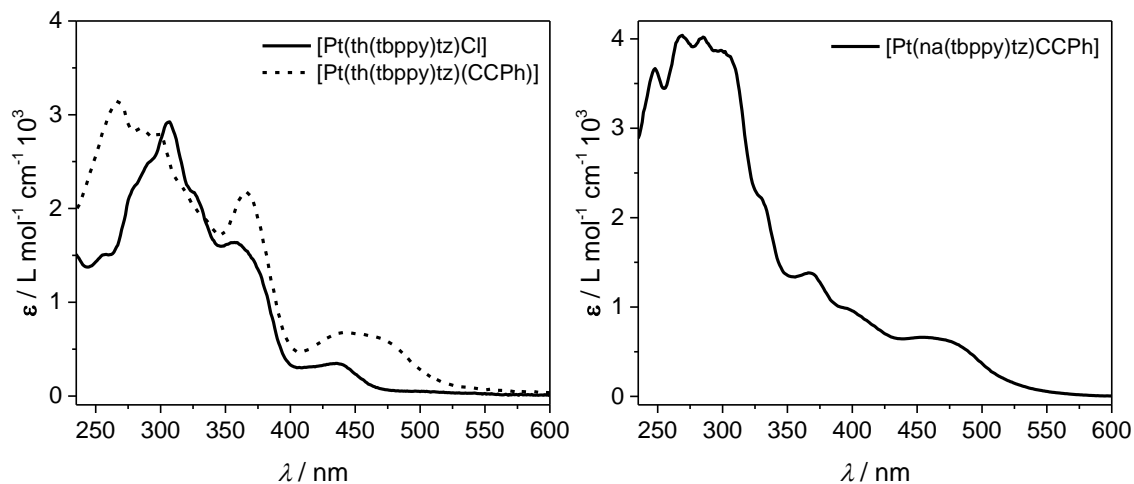

Fig. S34 UV-vis absorption spectra of [Pt(th(tbppy)tz)Cl] (**17**) and [Pt(th(tbppy)tz)(CCPh)] (**18**) (left) and [Pt(na(tbppy)tz)(CCPh)] (**6**) (right) in  $\text{CH}_2\text{Cl}_2$  (298 K).

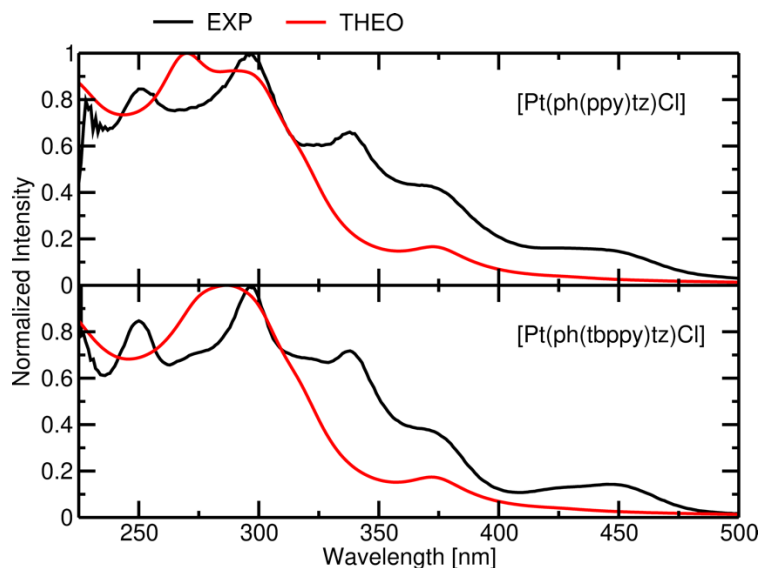

**Fig. S35** TD-DFT-calculated UV-vis absorption spectra (THEO, red) compared to experimental spectra (EXP, black) of [Pt(ph(ppytz)Cl] (**1**) and [Pt(ph(tbppy)tz)Cl] (**2**).

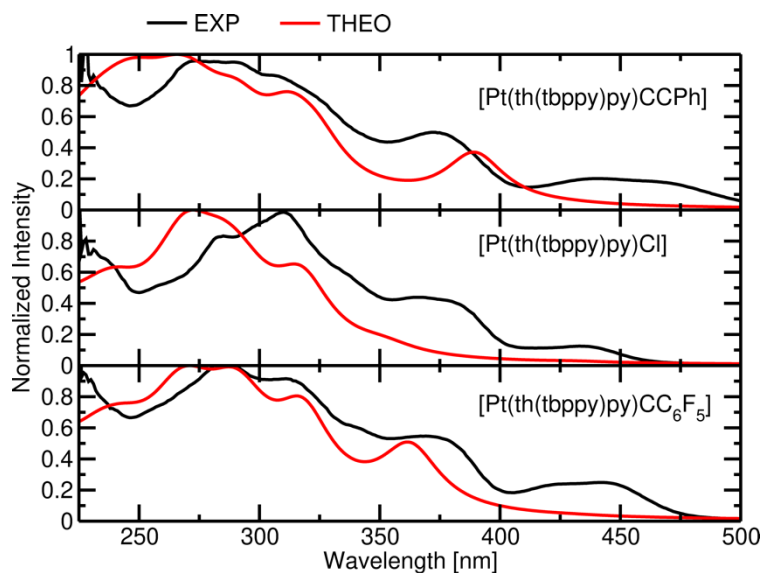

**Fig. S36** TD-DFT-calculated UV-vis absorption spectra (THEO, red) compared to experimental spectra (EXP, black) of [Pt(th(tbppy)py)C≡CPh] (**12**), [Pt(ph(tbppy)tz)Cl] (**2**), and [Pt(th(tbppy)py)C≡CC<sub>6</sub>F<sub>5</sub>] (**13**).

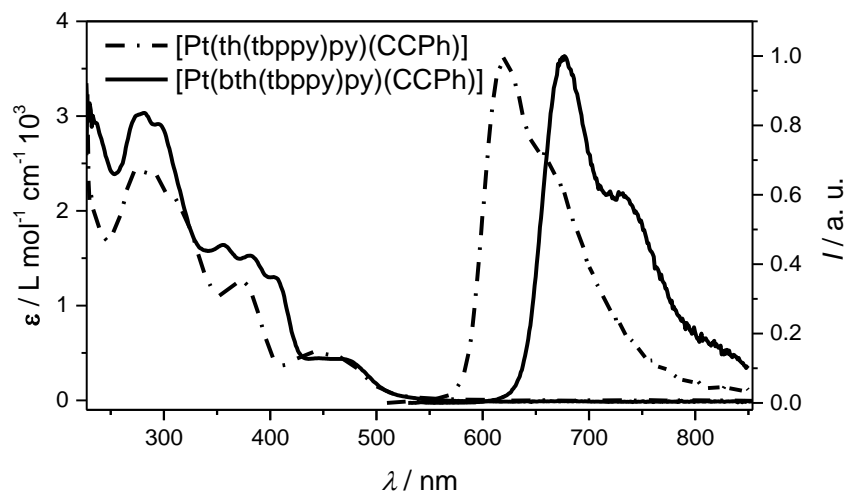

**Fig. S37** UV-vis absorption spectra (left) and normalised emission spectra (right) of [Pt(th(tbppy)py)CCPh] (**12**) and [Pt(bth(tbppy)py)CCPh] (**16**) in CH<sub>2</sub>Cl<sub>2</sub> at 298 K upon excitation at 350 nm.

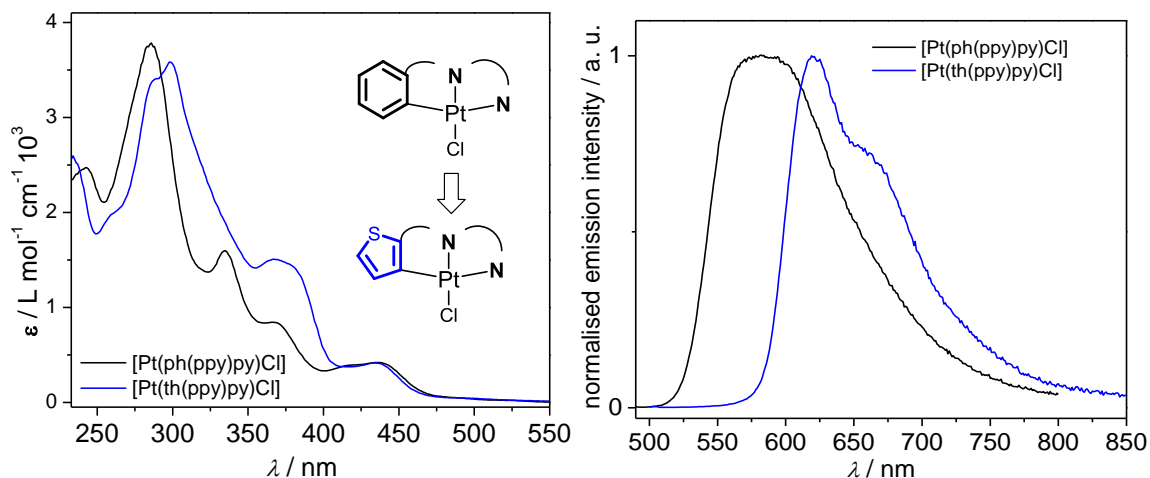

**Fig. S38** UV-vis absorption spectra (left) and normalised emission spectra (right) of [Pt(th(ppy)py)Cl] (**10**) and [Pt(ph(ppy)py)Cl] in CH<sub>2</sub>Cl<sub>2</sub> at 298 K upon excitation at 350 nm.

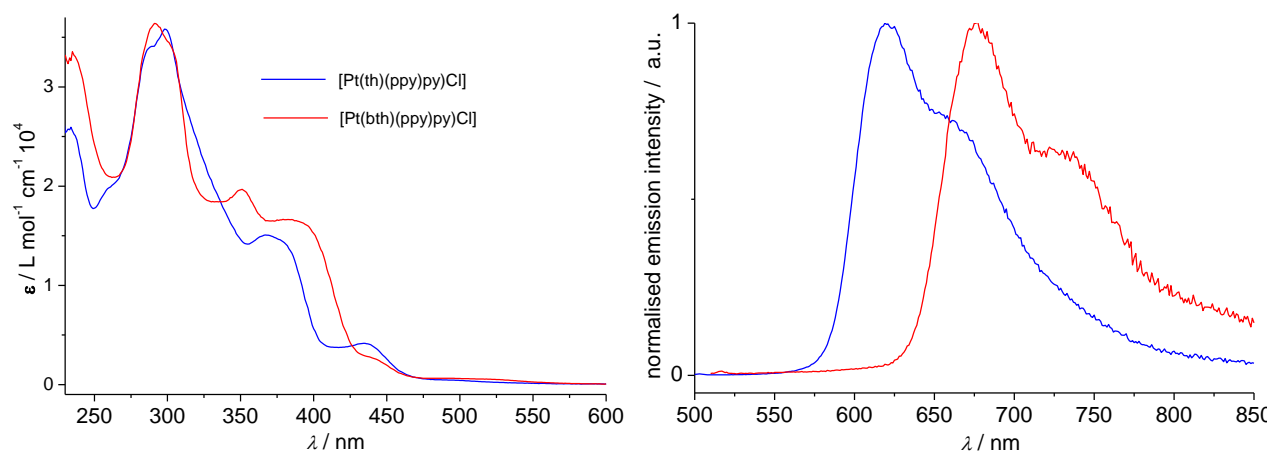

**Fig. S39** UV-vis absorption spectra (left) and normalised emission spectra (right) of [Pt(th(tbppy)py)Cl] (**11**) and [Pt(bth(tbppy)py)Cl] (**15**) in CH<sub>2</sub>Cl<sub>2</sub> at 298 K upon excitation at 350 nm.

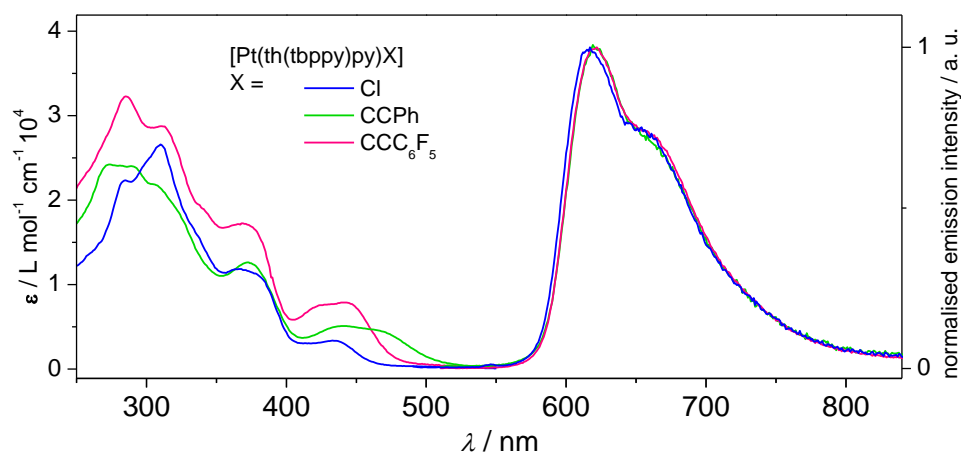

**Fig. S40** UV-vis absorption spectra (left) and normalised emission spectra (right) of [Pt(th(tbppy)py)X] with X = Cl, CCPh, or CCC<sub>6</sub>F<sub>5</sub> (**11**, **12**, **13**) in CH<sub>2</sub>Cl<sub>2</sub> at 298 K upon excitation at 350 nm.

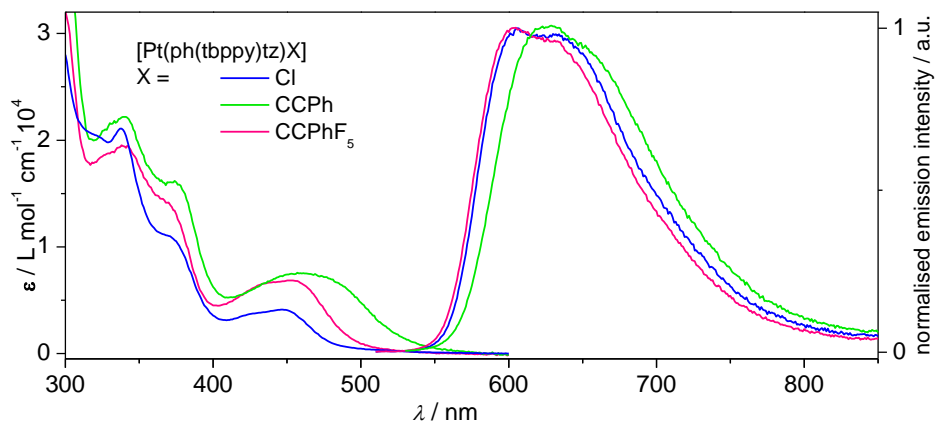

**Fig. S41** UV-vis absorption spectra (left) and normalised emission spectra (right) of  $[\text{Pt}(\text{ph}(\text{tbppy})\text{tz})\text{X}]$  with  $\text{X} = \text{Cl}$ ,  $\text{CCPh}$ , or  $\text{CCPhF}_5$  (**2**, **3**, **4**) in  $\text{CH}_2\text{Cl}_2$  at 298 K upon excitation at 350 nm.

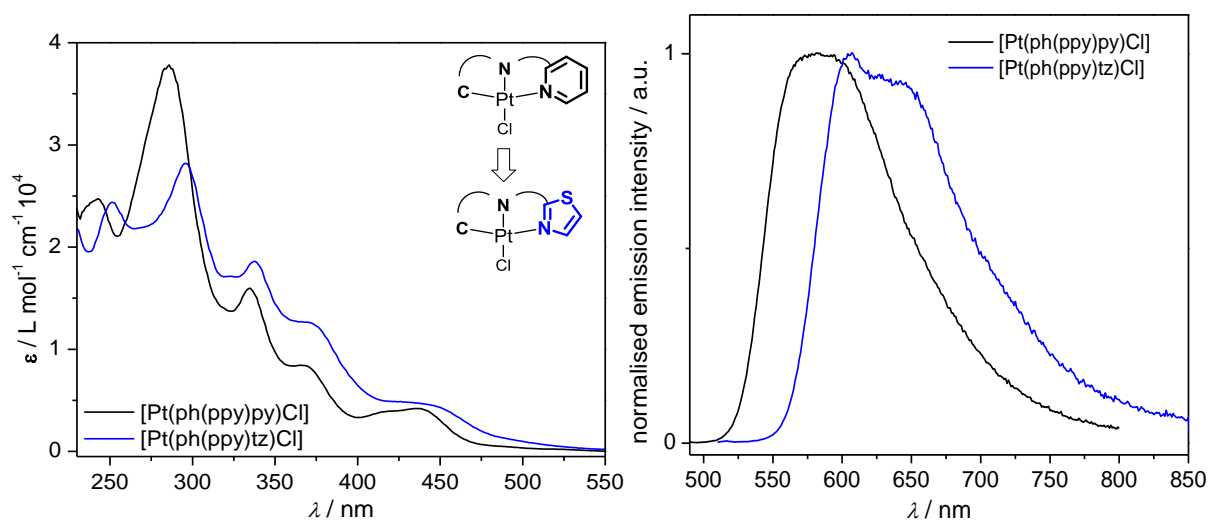

**Fig. S42** UV-vis absorption spectra (left) and normalised emission spectra (right) of  $[\text{Pt}(\text{ph}(\text{ppy})\text{py})\text{Cl}]$  and  $[\text{Pt}(\text{ph}(\text{ppy})\text{tz})\text{Cl}]$  (**1**) in  $\text{CH}_2\text{Cl}_2$  at 298 K upon excitation at 350 nm.

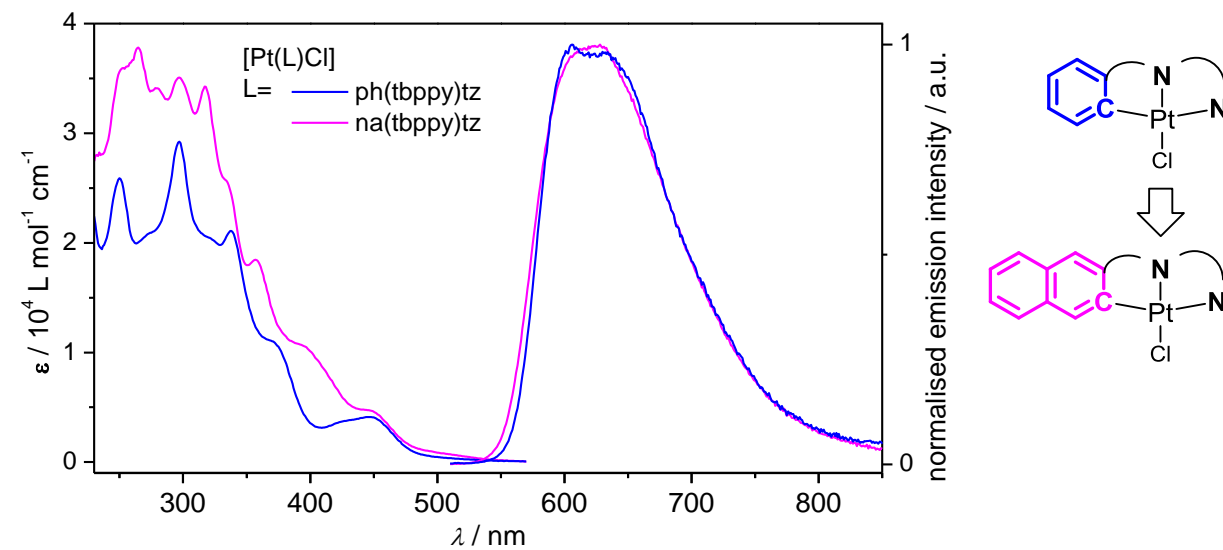

**Fig. S43** UV-vis absorption spectra (left) and normalised emission spectra (right) of  $[\text{Pt}(\text{ph}(\text{tbppy})\text{tz})\text{Cl}]$  (**2**) and  $[\text{Pt}(\text{na}(\text{tbppy})\text{tz})\text{Cl}]$  (**5**) in  $\text{CH}_2\text{Cl}_2$  at 298 K upon excitation at 350 nm.

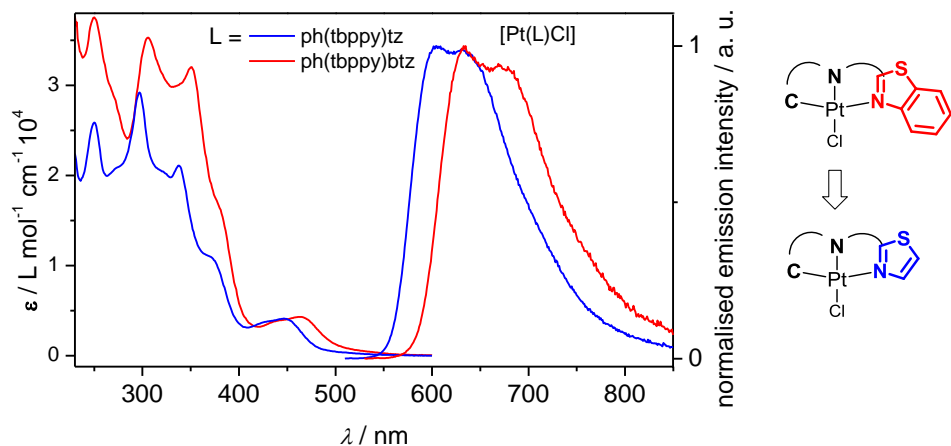

**Fig. S44** UV-vis absorption spectra (left) and normalised emission spectra (right) of [Pt(ph(tbppy)tz)Cl] (**2**) and [Pt(ph(tbppy)btz)Cl] (**8**) in CH<sub>2</sub>Cl<sub>2</sub> at 298 K upon excitation at 350 nm.

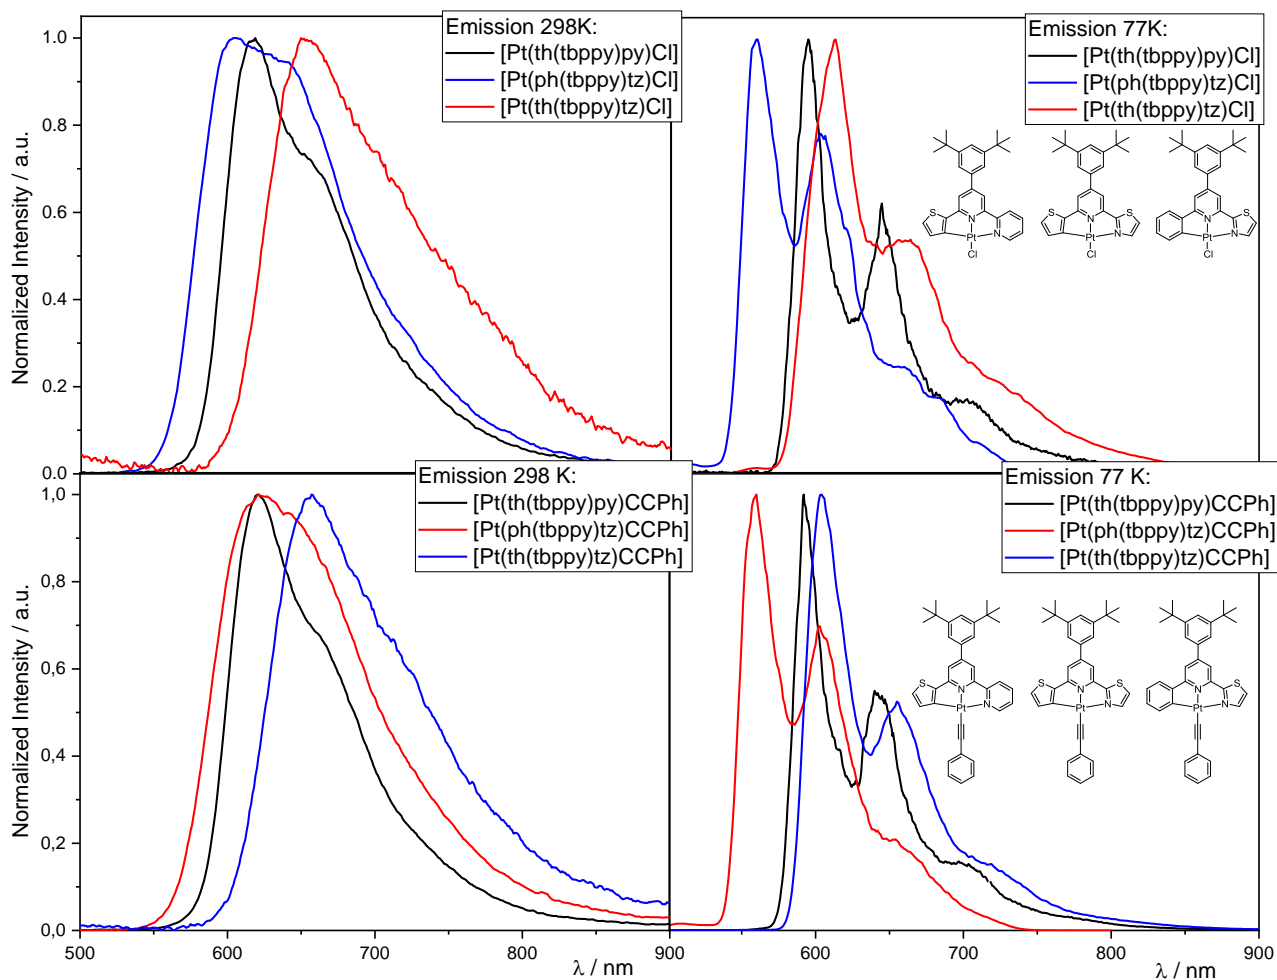

**Fig. S45** Normalised photoluminescence spectra ( $\lambda_{\text{exc}} = 350 \text{ nm}$ ) with focus on the influence of the peripheral ring; top: [Pt(th(tbppy)py)Cl] (**11**) (black), [Pt(ph(tbppy)tz)Cl] (**2**) (blue) and [Pt(th(tbppy)tz)Cl] (**17**) (red); bottom: [Pt(th(tbppy)py)CCPh] (**12**) (black), [Pt(ph(tbppy)tz)CCPh] (**3**) (red) and [Pt(th(tbppy)tz)CCPh] (**18**) (blue). Measured in CH<sub>2</sub>Cl<sub>2</sub> at 298 K (left) or frozen glassy CH<sub>2</sub>Cl<sub>2</sub>/MeOH matrices at 77 K (right).

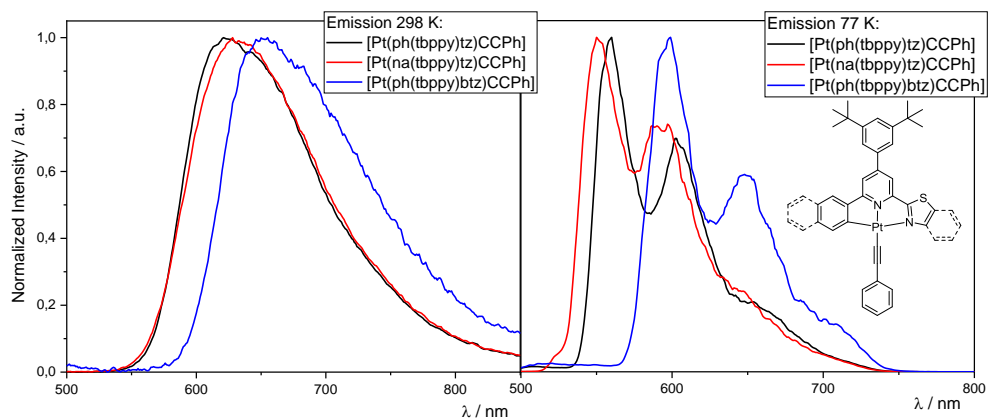

**Fig. S46** Normalised photoluminescence spectra ( $\lambda_{exc} = 350$  nm) involving the main ligands used for **class A** complexes (see Table 1); [Pt(ph(tbppytz)CCPh) (**3**) (black), [Pt(na(tbppytz)CCPh) (**6**) (red) and [Pt(ph(tbppytz)CCPh) (**9**) (blue) in  $\text{CH}_2\text{Cl}_2$  at 298 K (left) and in frozen glassy  $\text{CH}_2\text{Cl}_2/\text{MeOH}$  matrix (V:V = 1:1) at 77 K (right).

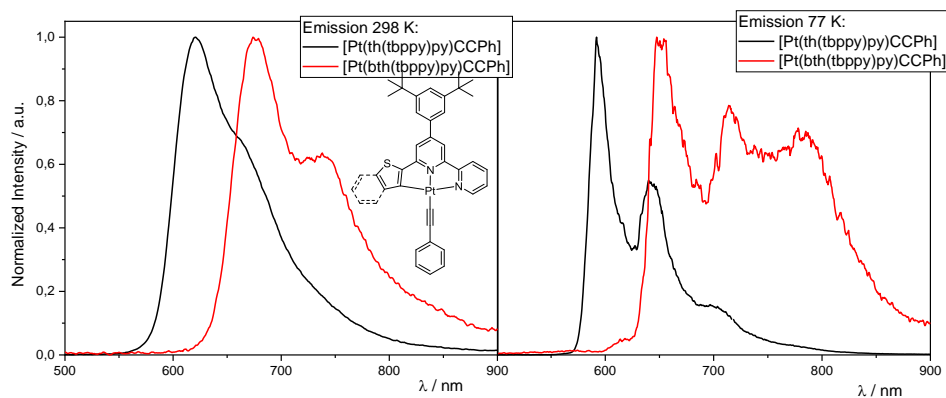

**Fig. S47** Normalised photoluminescence spectra ( $\lambda_{exc} = 350$  nm) involving the main ligands used for **class B** complexes (see Table 1) [Pt(th(tbppypy)CCPh) (**12**) (black) and [Pt(bth(tbppypy)CCPh) (**16**) (red) in fluid  $\text{CH}_2\text{Cl}_2$  at 298 K (left) and in frozen glassy  $\text{CH}_2\text{Cl}_2/\text{MeOH}$  matrices (V:V = 1:1) at 77 K (right).

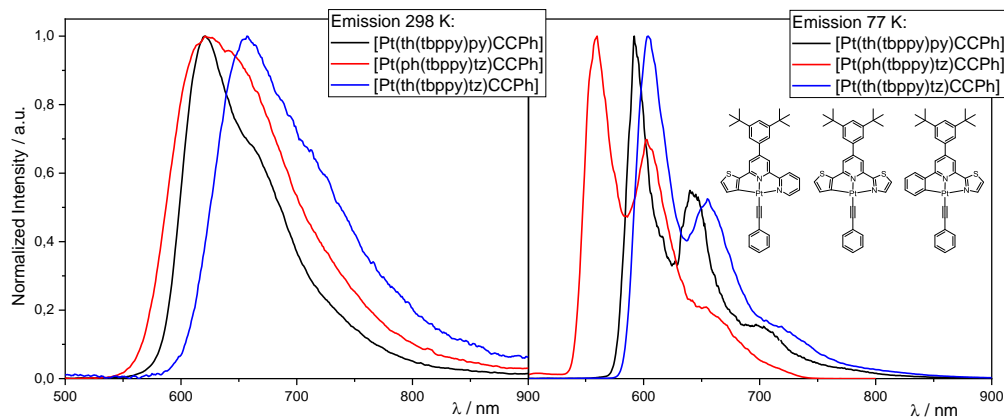

**Fig. S48** Normalised photoluminescence spectra ( $\lambda_{exc} = 350$  nm) of [Pt(th(tbppypy)CCPh) (**12**) (black), [Pt(ph(tbppytz)CCPh) (**3**) (red) and [Pt(th(tbppytz)CCPh) (**18**) (blue) in  $\text{CH}_2\text{Cl}_2$  at 298 K (left) and in frozen glassy  $\text{CH}_2\text{Cl}_2/\text{MeOH}$  matrices (V:V = 1:1) (right) at 77 K.

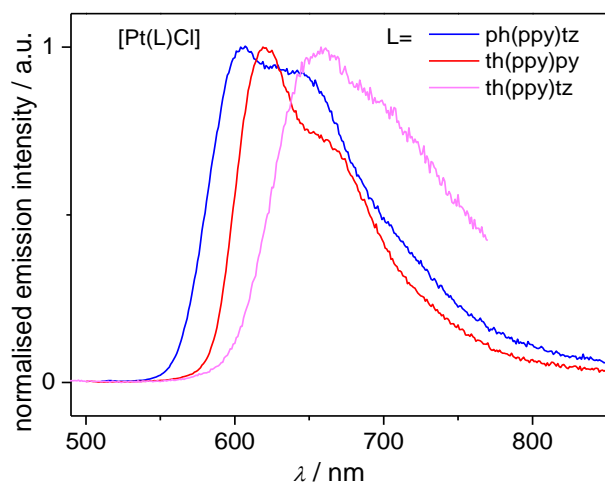

**Fig. S49** Normalised emission spectra of [Pt(ph(ppy)tz)Cl] (**1**) (blue), [Pt(th(ppy)py)Cl] (**10**) (red) and [Pt(th(ppy)tz)Cl] (violet) in CH<sub>2</sub>Cl<sub>2</sub> at 298 K upon excitation at 350 nm.

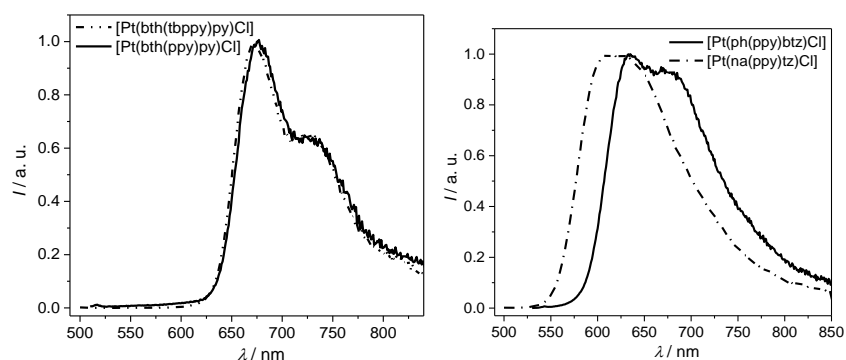

**Fig. S50** Normalised emission spectra of, [Pt(bth(tbppy)py)Cl] (**15**), [Pt(bth(ppy)py)Cl] (**14**) (left), and [Pt(ph(ppy)btz)Cl] (**7**), [Pt(na(ppy)tz)Cl] (right), in CH<sub>2</sub>Cl<sub>2</sub> at 298 K upon excitation with 350 nm.

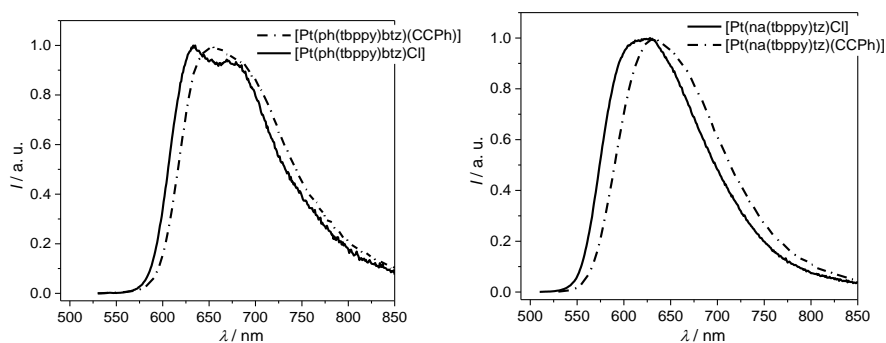

**Fig. S51** Normalised emission spectra of (left), [Pt(ph(tbppy)btz)(CCPh)] (**9**), [Pt(ph(tbppy)btz)Cl] (**8**) (left), and [Pt(na(tbppy)tz)Cl] (**5**), [Pt(na(tbppy)tz)(CCPh)] (**6**) (right), in CH<sub>2</sub>Cl<sub>2</sub> at 298 K upon excitation with 350 nm.

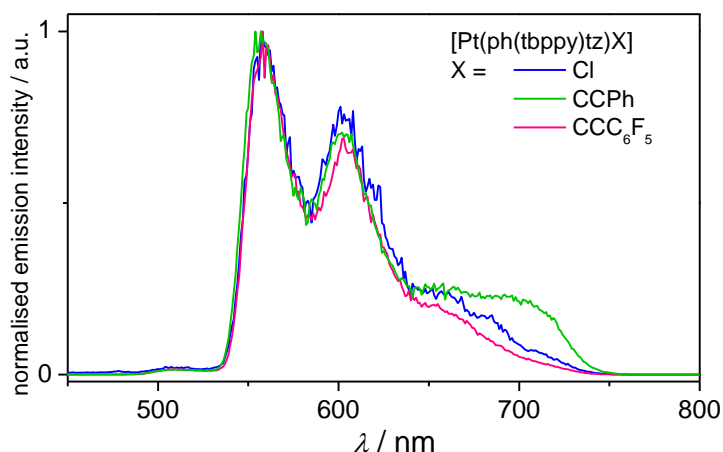

**Fig. S52** Normalised emission spectra of [Pt(ph(tbppy)tz)X] with X = Cl, CCPh, or CCC<sub>6</sub>F<sub>5</sub> (**2**), (**3**) and (**4**) in glassy frozen CH<sub>2</sub>Cl<sub>2</sub>/MeOH (1:1) matrix at 77 K upon excitation at 350 nm.

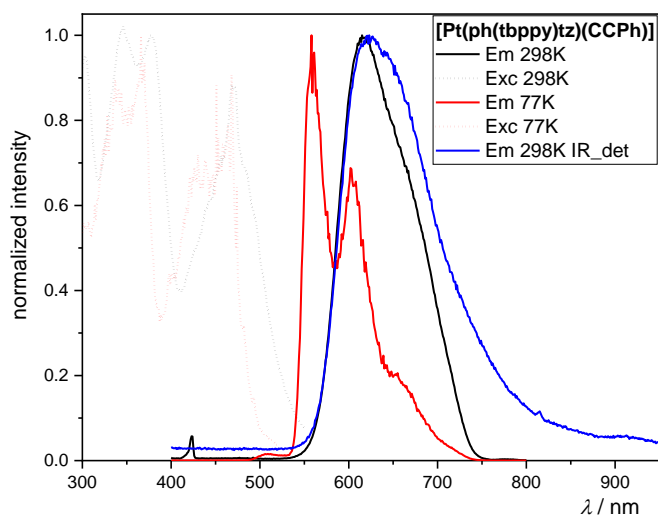

**Fig. S53** Excitation (dotted line) and emission spectra (solid line) of [Pt(ph(tbppy)tz)(CCPh)] (**3**) ( $\lambda_{exc} = 350$  nm;  $\lambda_{em} = 590$  nm at 298 K,  $\lambda_{em} = 560$  nm at 77 K) at 298 K with the UV/Vis-detector (black) and with IR-detector (blue) in CH<sub>2</sub>Cl<sub>2</sub> and at 77 K (red) in a frozen glassy CH<sub>2</sub>Cl<sub>2</sub>/MeOH matrix (V:V = 1:1). All solutions were optically diluted ( $A < 0.1$ ). Spectra normalised to the highest intensity.

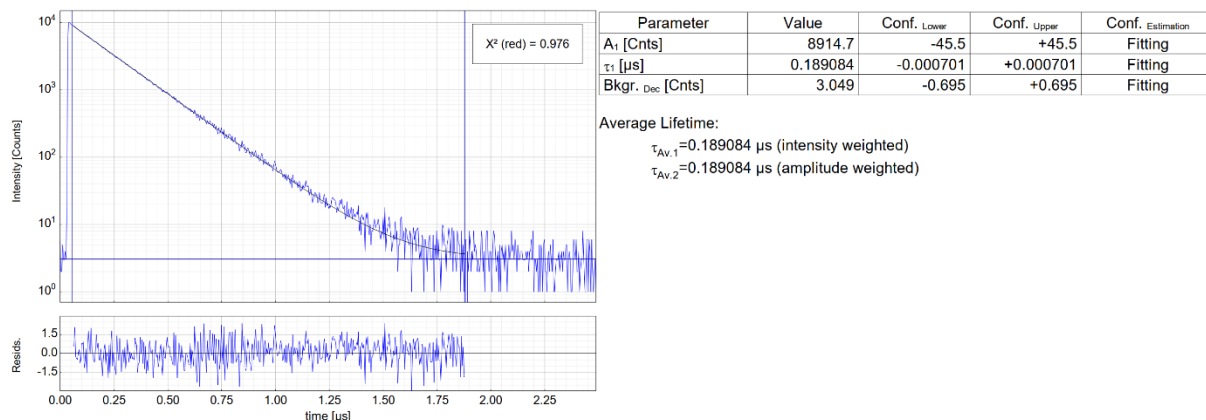

**Fig. S54** Left: Raw (experimental) time-resolved photoluminescence decay of [Pt(ph(tbppy)tz)CCPh] (**3**) in CH<sub>2</sub>Cl<sub>2</sub> at 298 K (air-equilibrated), including the residuals ( $\lambda_{exc} = 376.7$  nm,  $\lambda_{em} = 630$  nm). Right: Fitting parameters including pre-exponential factors and confidence limits.



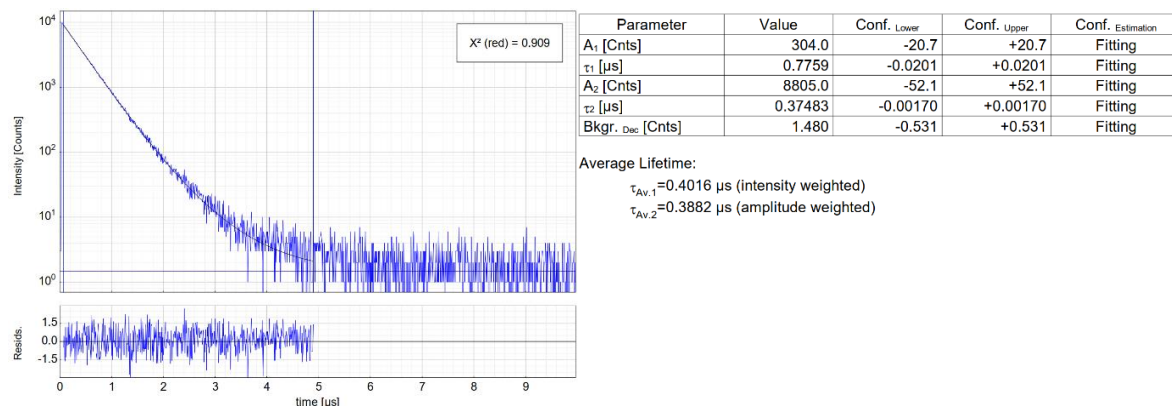

**Fig. S55** Left: Raw (experimental) time-resolved photoluminescence decay of [Pt(ph(tbppy)tz)CCPh] (**3**) in CH<sub>2</sub>Cl<sub>2</sub> at 298 K (Ar-purged), including the residuals ( $\lambda_{\text{exc}} = 376.7$  nm,  $\lambda_{\text{em}} = 630$  nm). Right: Fitting parameters including pre-exponential factors and confidence limits.

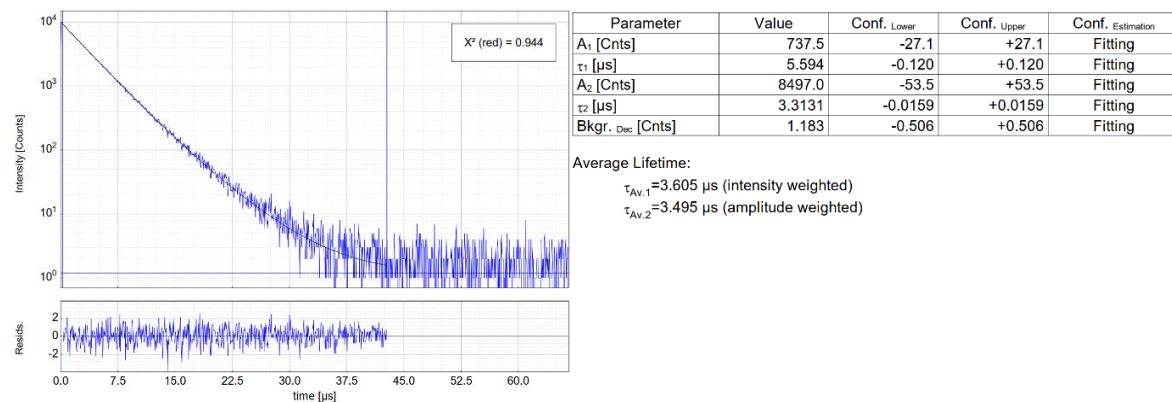

**Fig. S56** Left: Raw (experimental) time-resolved photoluminescence decay of [Pt(ph(tbppy)tz)CCPh] (**3**) in a frozen glassy CH<sub>2</sub>Cl<sub>2</sub>/MeOH matrix (V:V = 1:1) at 77 K, including the residuals ( $\lambda_{\text{exc}} = 376.7$  nm,  $\lambda_{\text{em}} = 560$  nm). Right: Fitting parameters including pre-exponential factors and confidence limits.

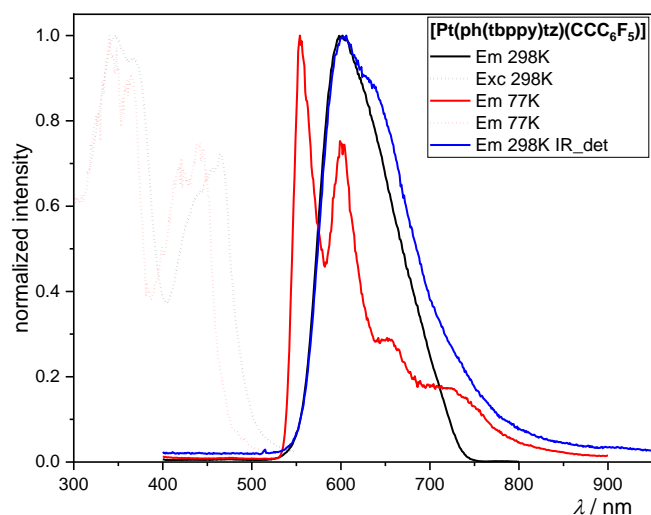

**Fig. S57** Excitation (dotted line) and emission spectra (solid line) of [Pt(ph(tbppy)tz)(CCC<sub>6</sub>F<sub>5</sub>)] (**4**) ( $\lambda_{\text{exc}} = 350$  nm;  $\lambda_{\text{em}} = 580$  nm at 298 K,  $\lambda_{\text{em}} = 560$  nm at 77 K) at 298 K with the UV/Vis-detector (black) and with IR-detector (blue) in CH<sub>2</sub>Cl<sub>2</sub> and at 77 K (red) in a frozen glassy CH<sub>2</sub>Cl<sub>2</sub>/MeOH matrix (V:V = 1:1). All solutions were optically diluted ( $A < 0.1$ ). Spectra normalised to the highest intensity.

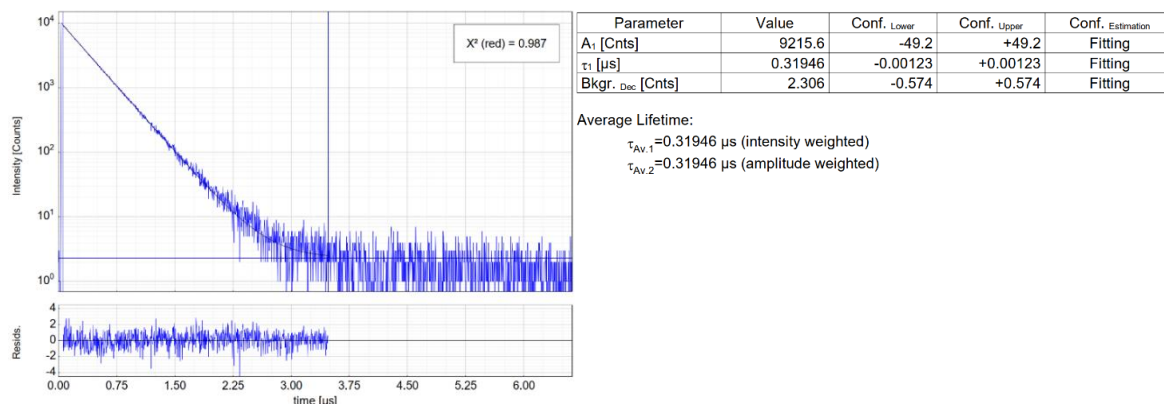

**Fig. S58** Left: Raw (experimental) time-resolved photoluminescence decay of [Pt(ph(tbppy)tz)CC<sub>6</sub>F<sub>5</sub>] (**4**) in CH<sub>2</sub>Cl<sub>2</sub> at 298 K (air-equilibrated), including the residuals ( $\lambda_{exc} = 376.7$  nm,  $\lambda_{em} = 600$  nm). Right: Fitting parameters including pre-exponential factors and confidence limits.

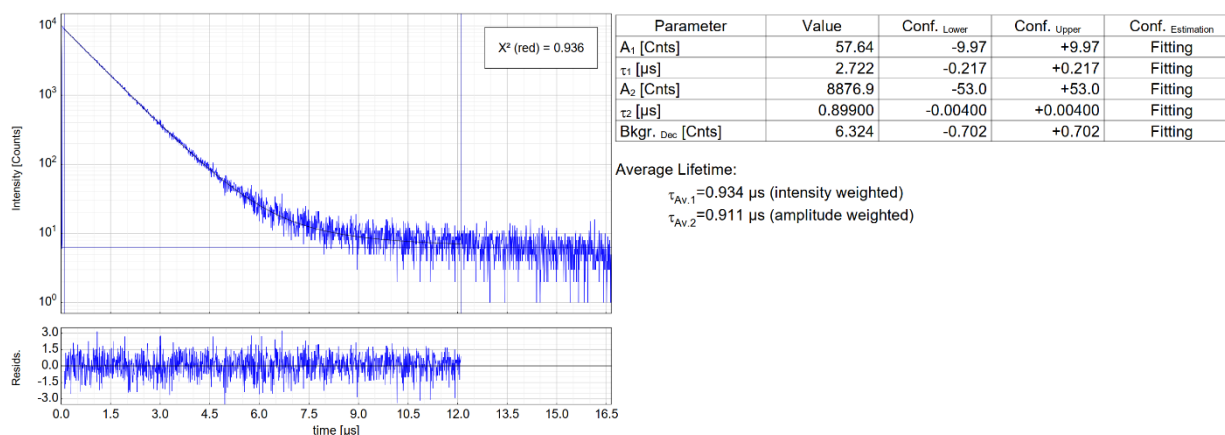

**Fig. S59** Left: Raw (experimental) time-resolved photoluminescence decay of [Pt(ph(tbppy)tz)CC<sub>6</sub>F<sub>5</sub>] (**4**) in CH<sub>2</sub>Cl<sub>2</sub> at 298 K (Ar-purged), including the residuals ( $\lambda_{exc} = 376.7$  nm,  $\lambda_{em} = 600$  nm). Right: Fitting parameters including pre-exponential factors and confidence limits.

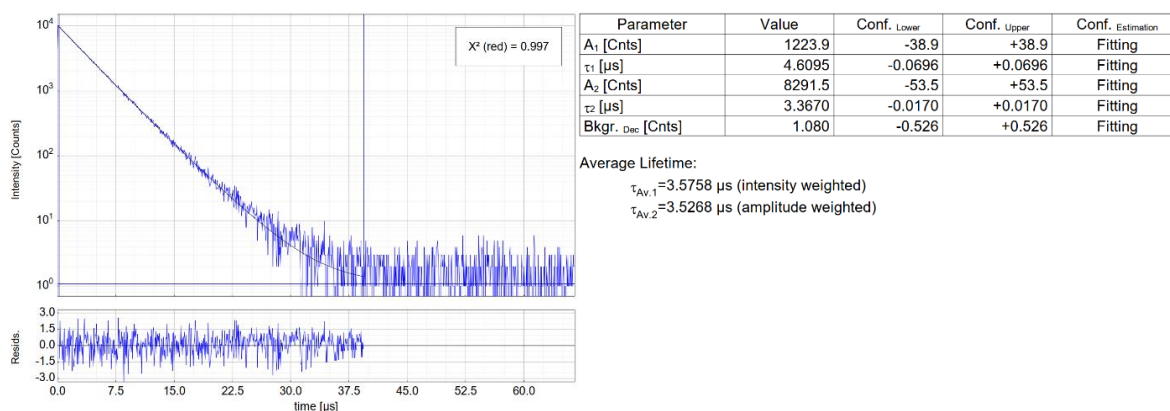

**Fig. S60** Left: Raw (experimental) time-resolved photoluminescence decay of [Pt(ph(tbppy)tz)CC<sub>6</sub>F<sub>5</sub>] (**4**) in a frozen glassy CH<sub>2</sub>Cl<sub>2</sub>/MeOH matrix (V:V = 1:1) at 77 K, including the residuals ( $\lambda_{exc} = 376.7$  nm,  $\lambda_{em} = 560$  nm). Right: Fitting parameters including pre-exponential factors and confidence limits.

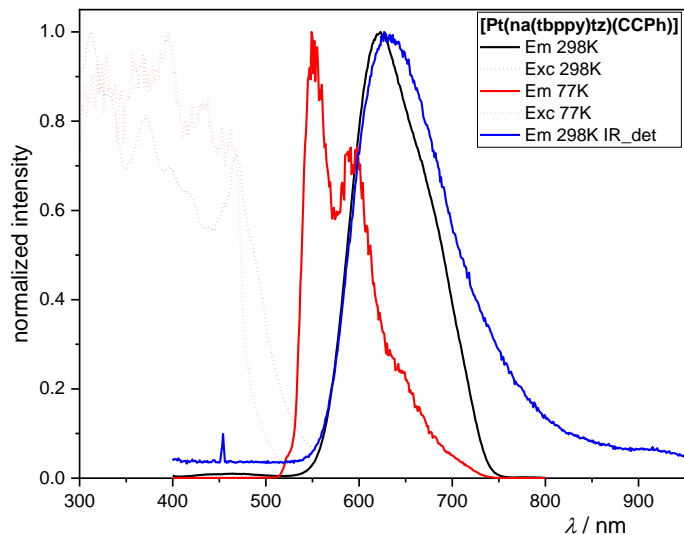

**Fig. S61** Excitation (dotted line) and emission spectra (solid line) of [Pt(na(tbppy)tz)(CCPh)] (**6**) ( $\lambda_{exc} = 350$  nm;  $\lambda_{em} = 590$  nm at 298 K,  $\lambda_{em} = 550$  nm at 77 K) at 298 K with the UV/Vis-detector (black) and with IR-detector (blue) in  $\text{CH}_2\text{Cl}_2$  and at 77 K (red) in a frozen glassy  $\text{CH}_2\text{Cl}_2/\text{MeOH}$  matrix ( $V:V = 1:1$ ). All solutions were optically diluted ( $A < 0.1$ ). Spectra normalised to the highest intensity.

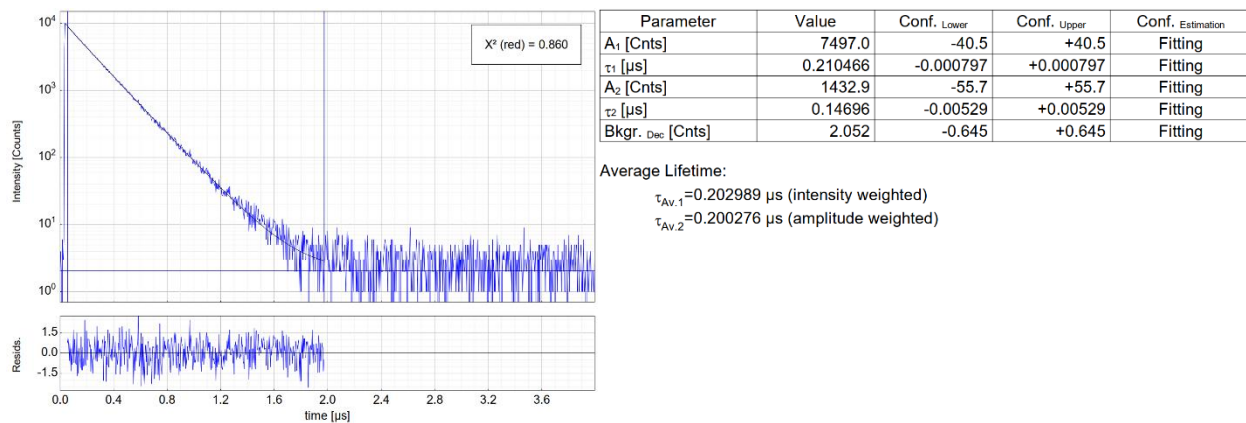

**Fig. S62** Left: Raw (experimental) time-resolved photoluminescence decay of [Pt(na(tbppy)tz)CCPh] (**6**) in  $\text{CH}_2\text{Cl}_2$  at 298 K (air-equilibrated), including the residuals ( $\lambda_{exc} = 376.7$  nm,  $\lambda_{em} = 620$  nm). Right: Fitting parameters including pre-exponential factors and confidence limits.

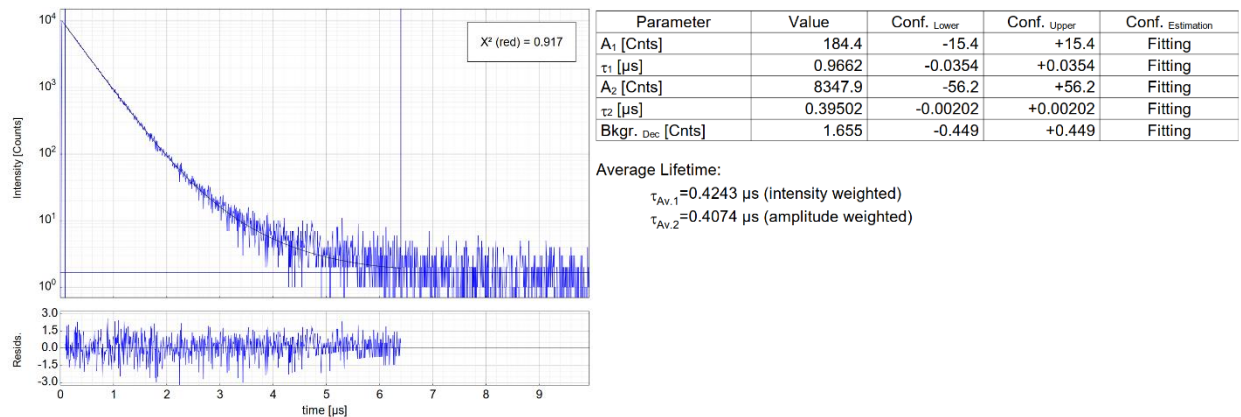

**Fig. S63** Left: Raw (experimental) time-resolved photoluminescence decay of [Pt(na(tbppy)tz)CCPh] (**6**) in  $\text{CH}_2\text{Cl}_2$  at 298 K (Ar-purged), including the residuals ( $\lambda_{exc} = 376.7$  nm,  $\lambda_{em} = 620$  nm). Right: Fitting parameters including pre-exponential factors and confidence limits.

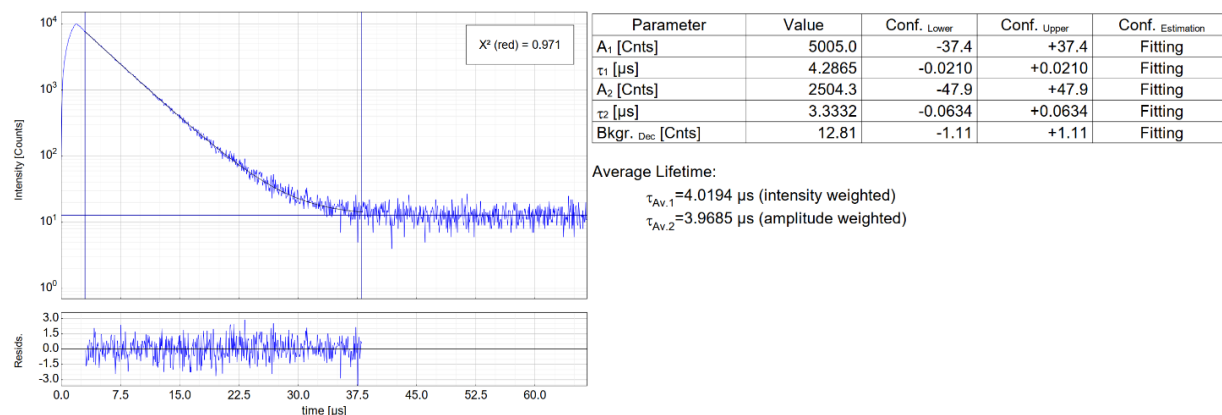

**Fig. S64** Left: Raw (experimental) time-resolved photoluminescence decay of [Pt(na(tbppy)tz)CCPh] (**6**) in a frozen glassy CH<sub>2</sub>Cl<sub>2</sub>/MeOH matrix (V:V = 1:1) at 77 K, including the residuals ( $\lambda_{\text{exc}} = 376.7$  nm,  $\lambda_{\text{em}} = 550$  nm). Right: Fitting parameters including pre-exponential factors and confidence limits.

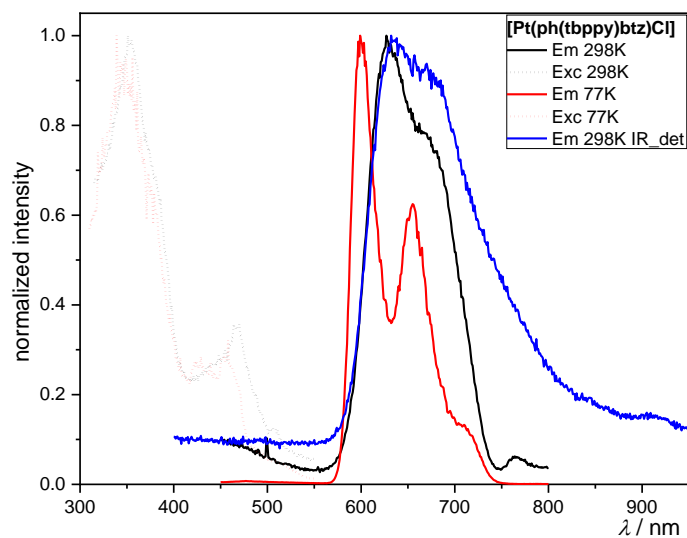

**Fig. S65** Excitation (dotted line) and emission spectra (solid line) of [Pt(ph(tbppy)btz)Cl] (**8**) ( $\lambda_{\text{exc}} = 350$  nm;  $\lambda_{\text{em}} = 600$  nm) at 298 K with the UV/Vis-detector (black) and with IR-detector (blue) in CH<sub>2</sub>Cl<sub>2</sub> and at 77 K (red) in a frozen glassy CH<sub>2</sub>Cl<sub>2</sub>/MeOH matrix (V:V = 1:1). All solutions were optically diluted ( $A < 0.1$ ). Spectra normalised to the highest intensity.

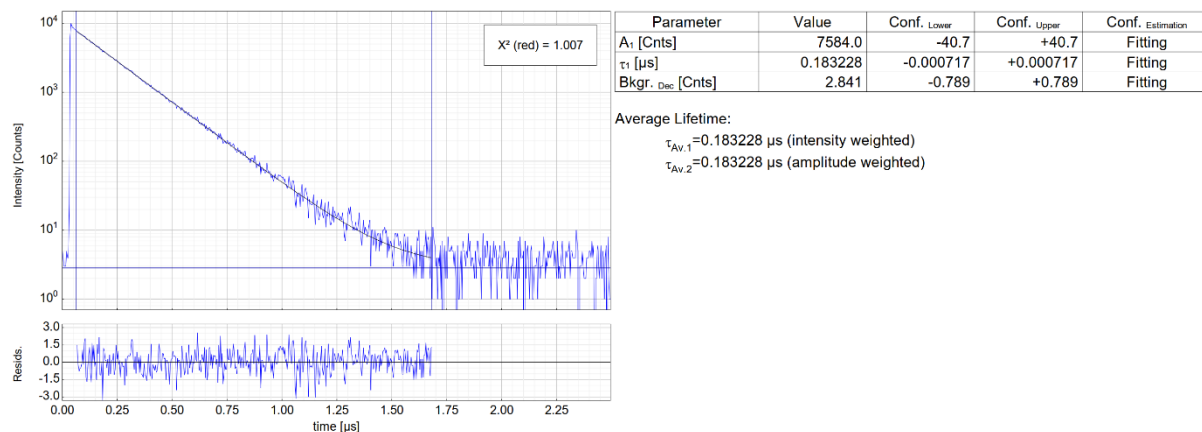

**Fig. S66** Left: Raw (experimental) time-resolved photoluminescence decay of [Pt(ph(tbppy)btz)Cl] (**8**) in CH<sub>2</sub>Cl<sub>2</sub> at 298 K (air-equilibrated), including the residuals ( $\lambda_{\text{exc}} = 376.7$  nm,  $\lambda_{\text{em}} = 630$  nm). Right: Fitting parameters including pre-exponential factors and confidence limits.

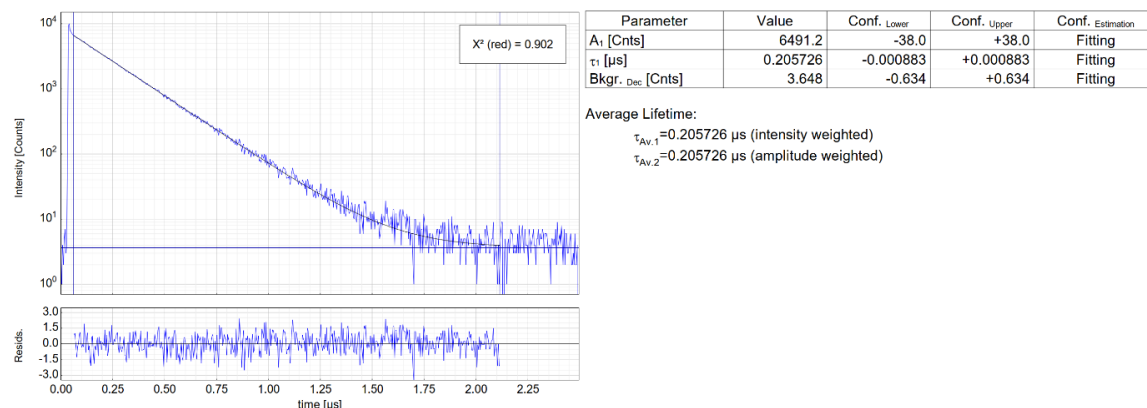

**Fig. S67** Left: Raw (experimental) time-resolved photoluminescence decay of [Pt(ph(tbppy)btz)Cl] (**8**) in CH<sub>2</sub>Cl<sub>2</sub> at 298 K (Ar-purged), including the residuals ( $\lambda_{exc} = 376.7$  nm,  $\lambda_{em} = 630$  nm). Right: Fitting parameters including pre-exponential factors and confidence limits.

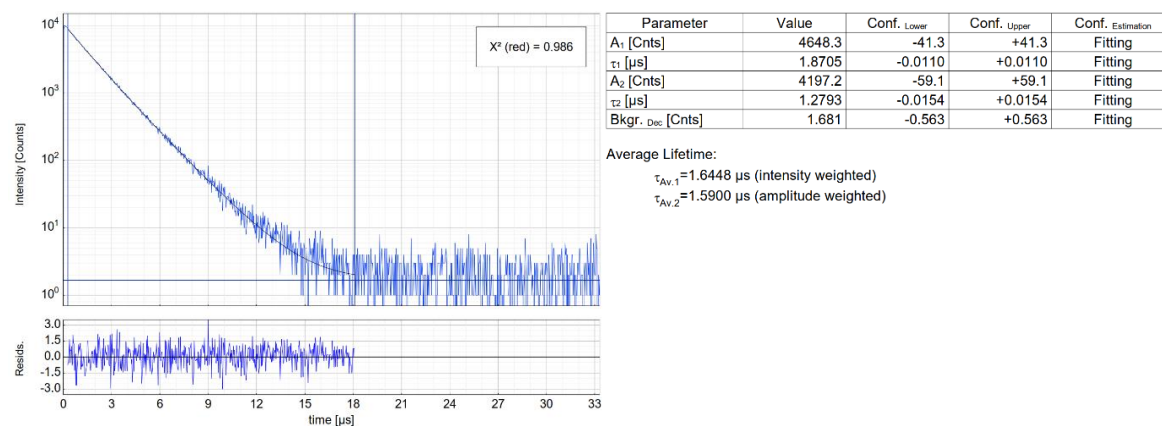

**Fig. S68** Left: Raw (experimental) time-resolved photoluminescence decay of [Pt(ph(tbppy)btz)Cl] (**8**) in a frozen glassy CH<sub>2</sub>Cl<sub>2</sub>/MeOH matrix (V:V = 1:1) at 77 K, including the residuals ( $\lambda_{exc} = 376.7$  nm,  $\lambda_{em} = \text{nm}$ ). Right: Fitting parameters including pre-exponential factors and confidence limits.

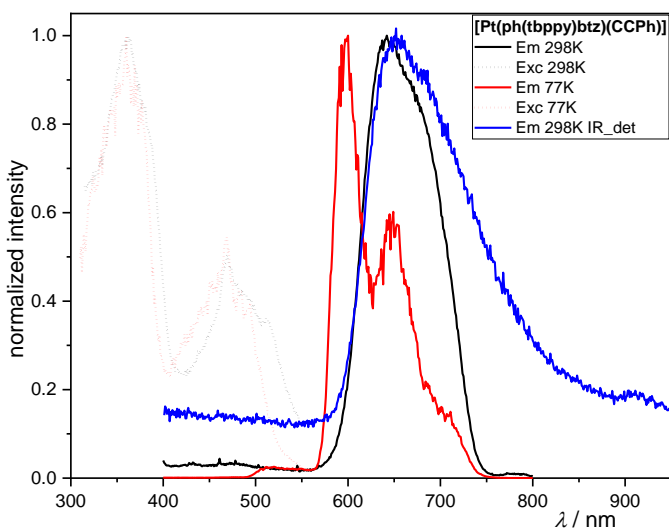

**Fig. S69** Excitation (dotted line) and emission spectra (solid line) of [Pt(ph(tbppy)btz)CCPh] (**9**) ( $\lambda_{exc} = 350$  nm;  $\lambda_{em} = 610$  nm at 298 K,  $\lambda_{em} = 600$  nm at 77 K) at 298 K with the UV/Vis-detector (black) and with IR-detector (blue) in CH<sub>2</sub>Cl<sub>2</sub> and at 77 K (red) in a frozen glassy CH<sub>2</sub>Cl<sub>2</sub>/MeOH matrix (V:V = 1:1). All solutions were optically diluted ( $A < 0.1$ ). Spectra normalised to the highest intensity.

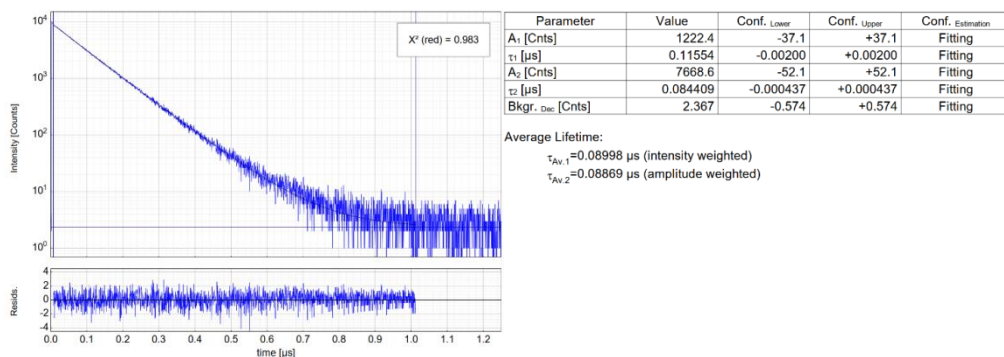

**Fig. S70** Left: Raw (experimental) time-resolved photoluminescence decay of [Pt(ph(tbppy)btz)CCPh] (9) in CH<sub>2</sub>Cl<sub>2</sub> at 298 K (air-equilibrated), including the residuals ( $\lambda_{exc} = 376.7 \text{ nm}$ ,  $\lambda_{em} = 640 \text{ nm}$ ). Right: Fitting parameters including pre-exponential factors and confidence limits.

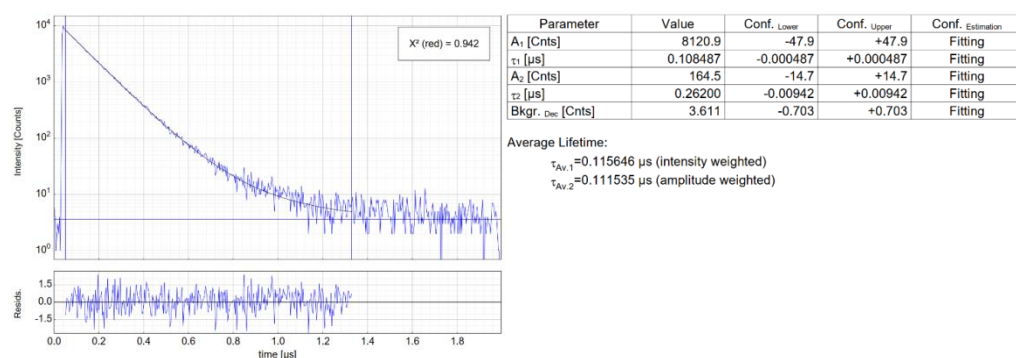

**Fig. S71** Left: Raw (experimental) time-resolved photoluminescence decay of [Pt(ph(tbppy)btz)CCPh] (9) in CH<sub>2</sub>Cl<sub>2</sub> at 298 K (Ar-purged), including the residuals ( $\lambda_{exc} = 376.7 \text{ nm}$ ,  $\lambda_{em} = 640 \text{ nm}$ ). Right: Fitting parameters including pre-exponential factors and confidence limits.

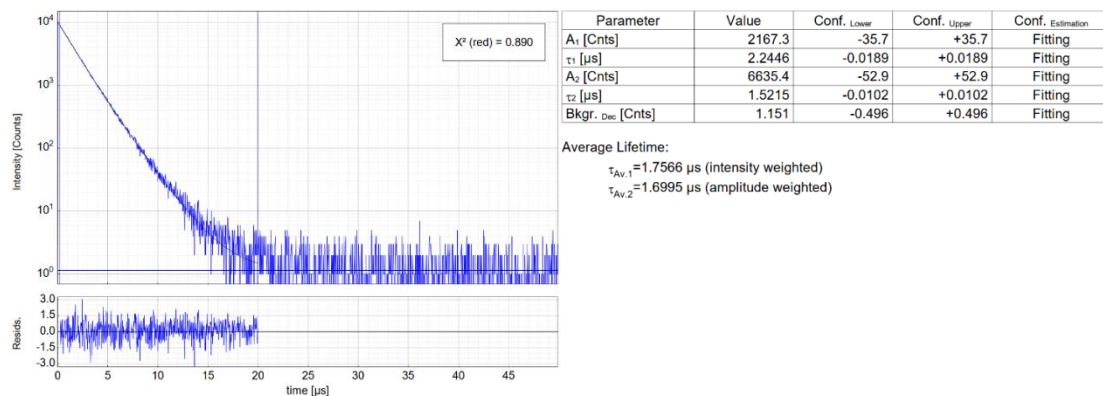

**Fig. S72** Left: Raw (experimental) time-resolved photoluminescence decay of [Pt(ph(tbppy)btz)CCPh] (9) in a frozen glassy CH<sub>2</sub>Cl<sub>2</sub>/MeOH matrix (V:V = 1:1) at 77 K, including the residuals ( $\lambda_{exc} = 376.7 \text{ nm}$ ,  $\lambda_{em} = 600 \text{ nm}$ ). Right: Fitting parameters including pre-exponential factors and confidence limits.

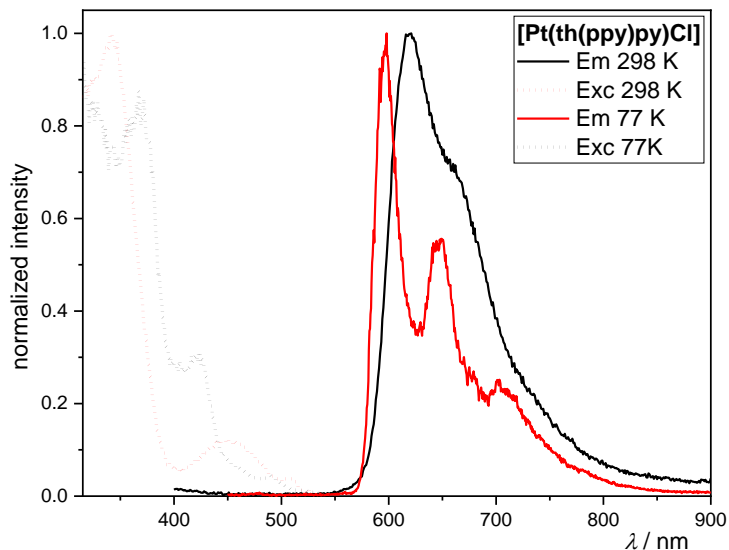

**Fig. S73** Excitation (dotted line) and emission spectra (solid line) of [Pt(th(ppy)py)Cl] (**10**) ( $\lambda_{\text{exc}} = 350 \text{ nm}$ ;  $\lambda_{\text{em}} = 600 \text{ nm}$ ) at 298 K (black) in  $\text{CH}_2\text{Cl}_2$  and at 77 K (red) in a frozen glassy  $\text{CH}_2\text{Cl}_2/\text{MeOH}$  matrix (V:V = 1:1). All solutions were optically diluted ( $A < 0.1$ ). Normalised to the highest intensity.

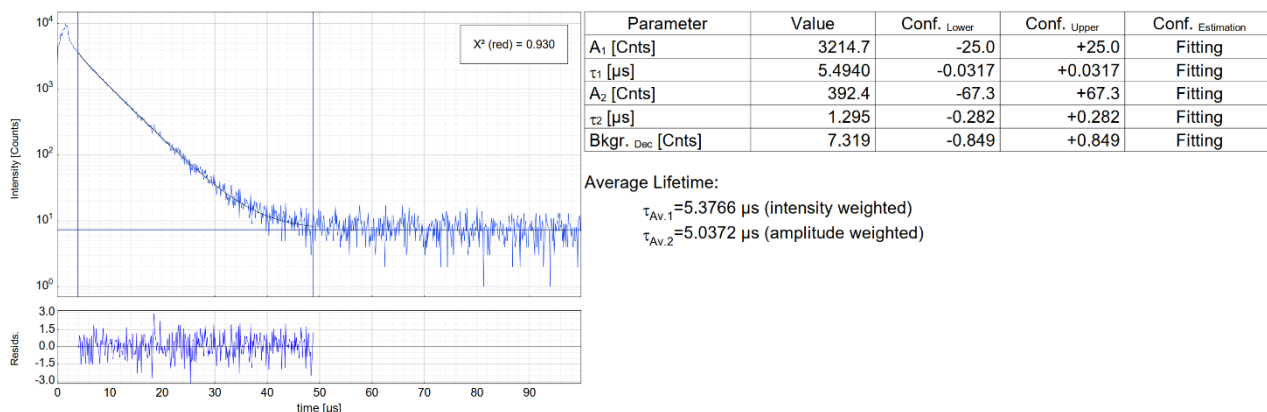

**Fig. S74** Left: Raw (experimental) time-resolved photoluminescence decay of [Pt(th(ppy)py)Cl] (**10**) in  $\text{CH}_2\text{Cl}_2$  at 298 K (Ar-purged), including the residuals ( $\lambda_{\text{exc}} = 376.7 \text{ nm}$ ,  $\lambda_{\text{em}} = 620 \text{ nm}$ ). Right: Fitting parameters including pre-exponential factors and confidence limits.

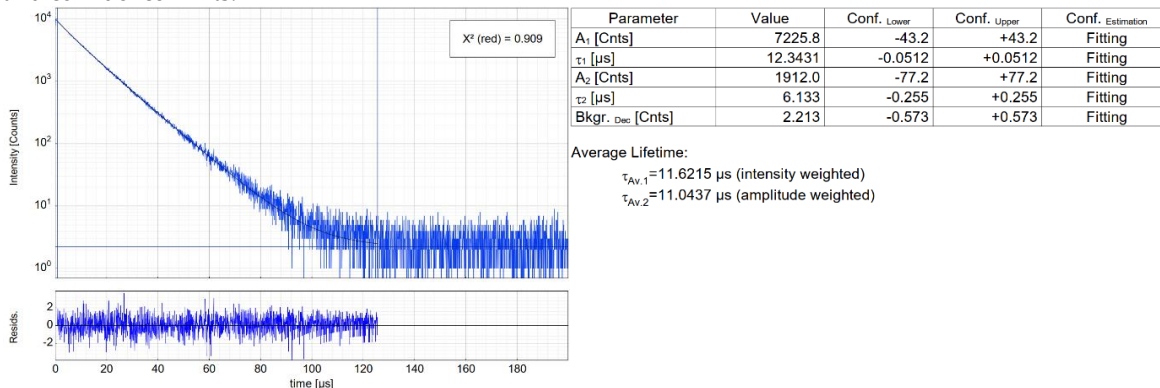

**Fig. S75** Left: Raw (experimental) time-resolved photoluminescence decay of [Pt(th(ppy)py)Cl] (**10**) in a frozen glassy  $\text{CH}_2\text{Cl}_2/\text{MeOH}$  matrix (V:V = 1:1) at 77 K, including the residuals ( $\lambda_{\text{exc}} = 376.7 \text{ nm}$ ,  $\lambda_{\text{em}} = 600 \text{ nm}$ ). Right: Fitting parameters including pre-exponential factors and confidence limits.

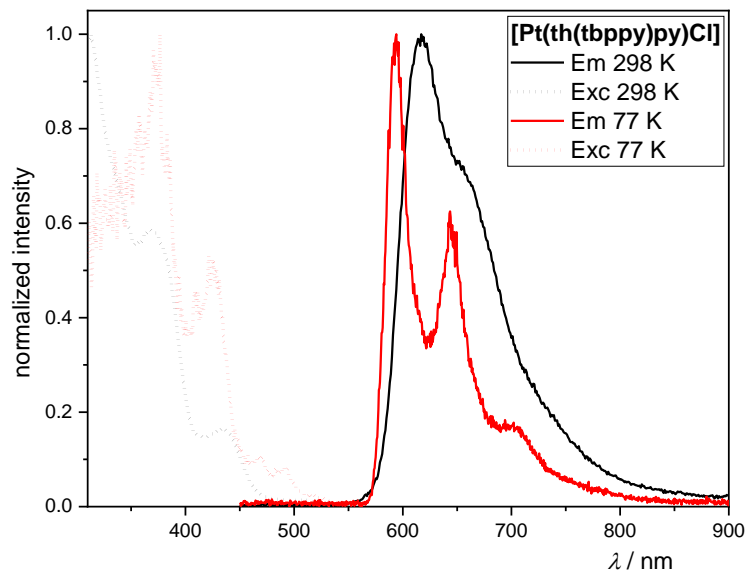

**Fig. S76** Excitation (dotted line) and emission spectra (solid line) of [Pt(th(tbpp)py)Cl] (**11**) ( $\lambda_{exc} = 350$  nm;  $\lambda_{em} = 600$  nm) at 298 K (black) in  $\text{CH}_2\text{Cl}_2$  and at 77 K (red) in a frozen glassy  $\text{CH}_2\text{Cl}_2/\text{MeOH}$  matrix (V:V = 1:1). All solutions were optically diluted ( $A < 0.1$ ). Spectra normalised to the highest intensity.

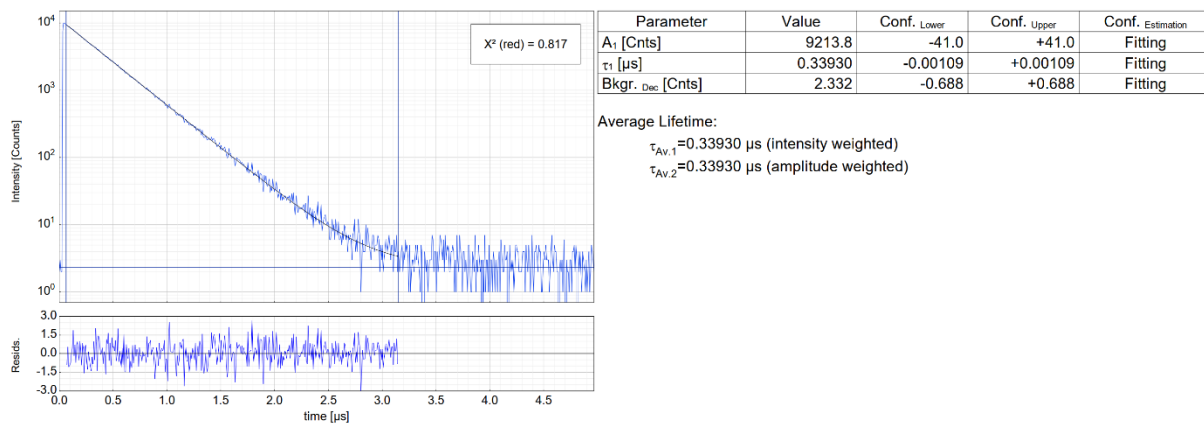

**Fig. S77** Left: Raw (experimental) time-resolved photoluminescence decay of [Pt(th(tbpp)py)Cl] (**11**) in  $\text{CH}_2\text{Cl}_2$  at 298 K (air-equilibrated), including the residuals ( $\lambda_{exc} = 376.7$  nm,  $\lambda_{em} = 620$  nm). Right: Fitting parameters including pre-exponential factors and confidence limits.

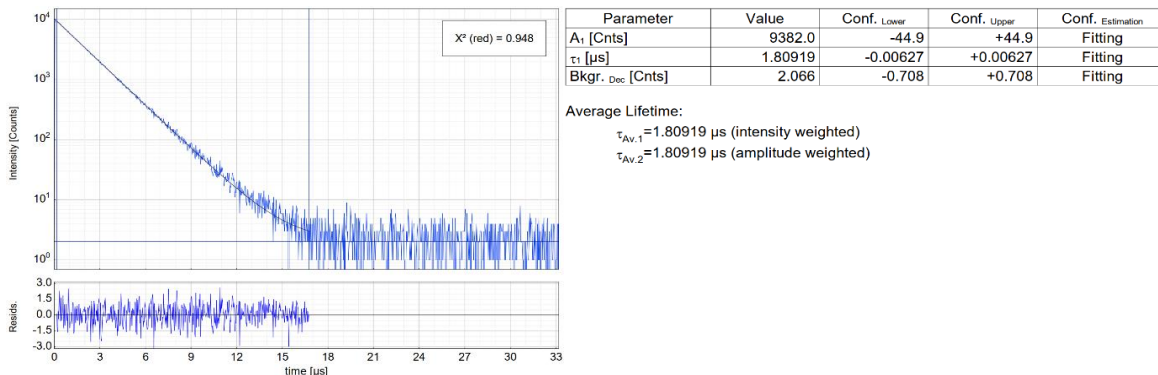

**Fig. S78** Left: Raw (experimental) time-resolved photoluminescence decay of [Pt(th(tbpp)py)Cl] (**11**) in  $\text{CH}_2\text{Cl}_2$  at 298 K (Ar-purged), including the residuals ( $\lambda_{exc} = 376.7$  nm,  $\lambda_{em} = 620$  nm). Right: Fitting parameters including pre-exponential factors and confidence limits.



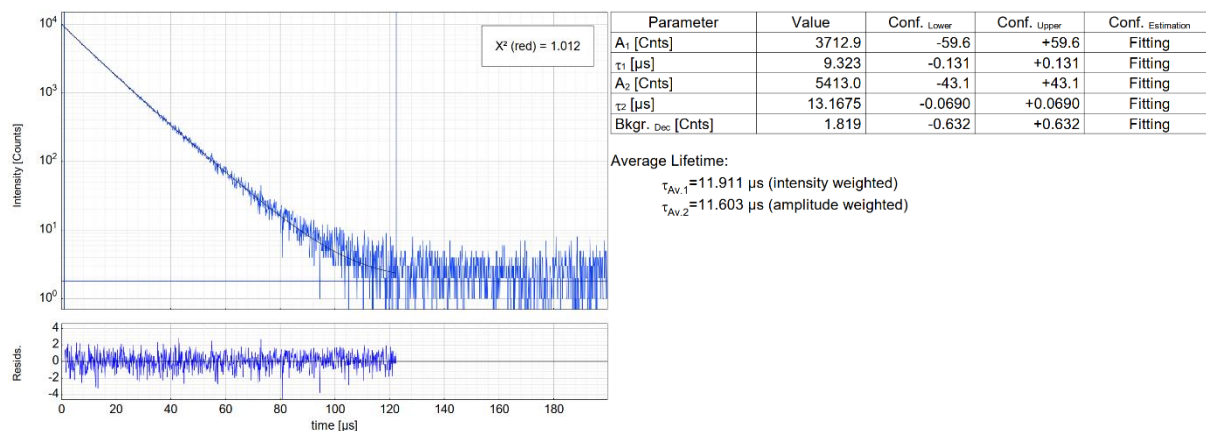

**Fig. S79** Left: Raw (experimental) time-resolved photoluminescence decay of [Pt(th(tbpp)py)Cl] (**11**) in a frozen glassy CH<sub>2</sub>Cl<sub>2</sub>/MeOH matrix (V:V = 1:1) at 77 K, including the residuals ( $\lambda_{\text{exc}} = 376.7$  nm,  $\lambda_{\text{em}} = 600$  nm). Right: Fitting parameters including pre-exponential factors and confidence limits.

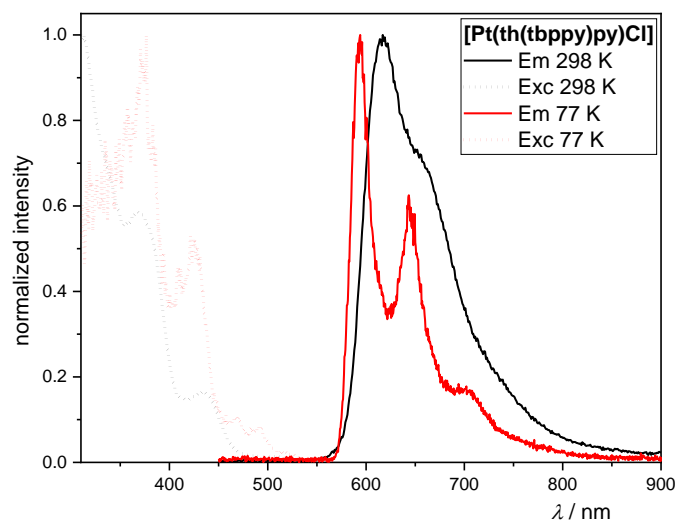

**Fig. S80** Excitation (dotted line) and emission spectra (solid line) of [Pt(th(tbpp)py)CCPh] (**12**) ( $\lambda_{\text{exc}} = 350$  nm;  $\lambda_{\text{em}} = 600$  nm) at 298 K (black) in CH<sub>2</sub>Cl<sub>2</sub> and at 77 K (red) in a frozen glassy CH<sub>2</sub>Cl<sub>2</sub>/MeOH matrix (V:V = 1:1). All solutions were optically diluted ( $A < 0.1$ ). Spectra normalised to the highest intensity.

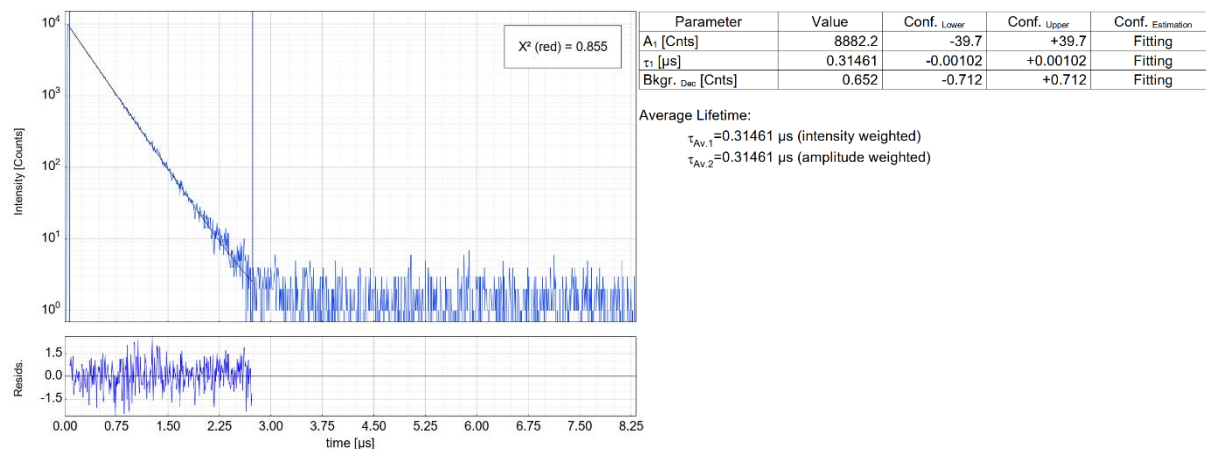

**Fig. S81** Left: Raw (experimental) time-resolved photoluminescence decay of [Pt(th(tbpp)py)CCPh] (**12**) in CH<sub>2</sub>Cl<sub>2</sub> at 298 K (air-equilibrated), including the residuals ( $\lambda_{\text{exc}} = 376.7$  nm,  $\lambda_{\text{em}} = 620$  nm). Right: Fitting parameters including pre-exponential factors and confidence limits.

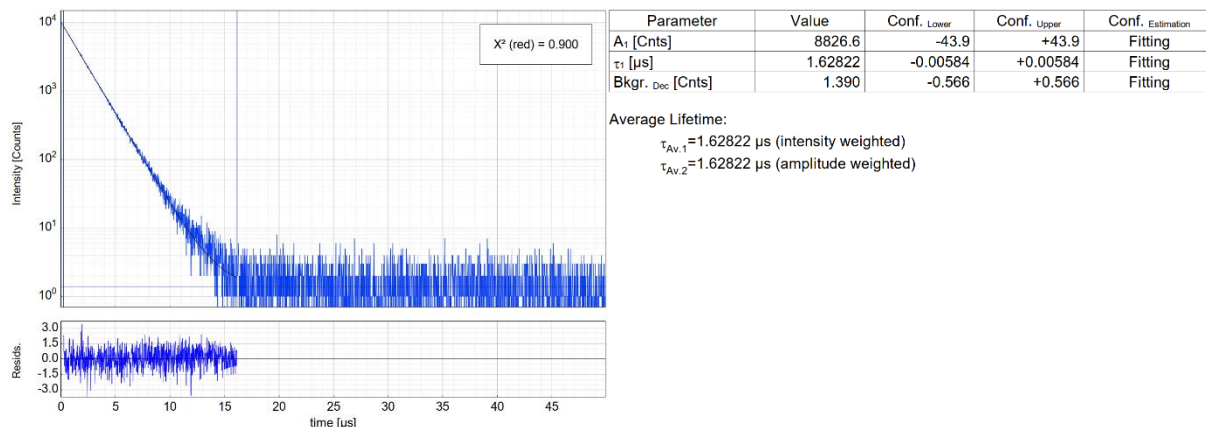

**Fig. S82** Left: Raw (experimental) time-resolved photoluminescence decay of [Pt(th(tbpp)py)CCPh] (**12**) in CH<sub>2</sub>Cl<sub>2</sub> at 298 K (Ar-purged), including the residuals ( $\lambda_{exc} = 376.7$  nm,  $\lambda_{em} = 620$  nm). Right: Fitting parameters including pre-exponential factors and confidence limits.

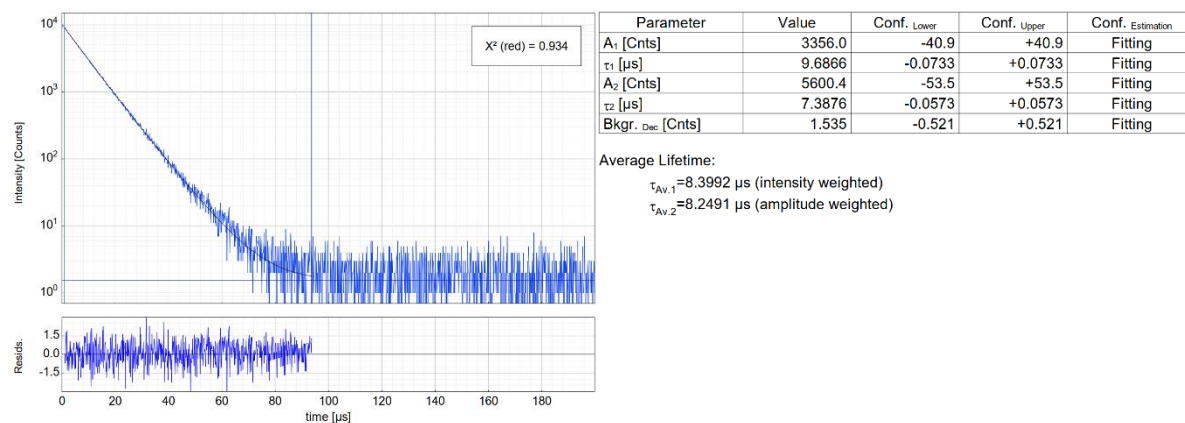

**Fig. S83** Left: Raw (experimental) time-resolved photoluminescence decay of [Pt(th(tbpp)py)CCPh] (**12**) in a frozen glassy CH<sub>2</sub>Cl<sub>2</sub>/MeOH matrix (V:V = 1:1) at 77 K, including the residuals ( $\lambda_{exc} = 376.7$  nm,  $\lambda_{em} = 600$  nm). Right: Fitting parameters including pre-exponential factors and confidence limits.

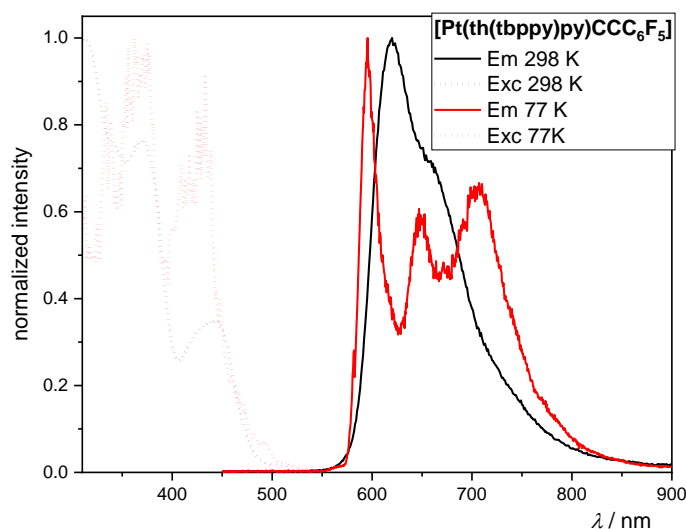

**Fig. S84** Excitation (dotted line) and emission spectra (solid line) of [Pt(th(tbpp)py)CCC<sub>6</sub>F<sub>5</sub>] (**13**) ( $\lambda_{exc} = 350$  nm;  $\lambda_{em} = 600$  nm) at 298 K (black) in CH<sub>2</sub>Cl<sub>2</sub> and at 77 K (red) in a frozen glassy CH<sub>2</sub>Cl<sub>2</sub>/MeOH matrix (V:V = 1:1). All solutions were optically diluted ( $A < 0.1$ ). Spectra normalised to the highest intensity.

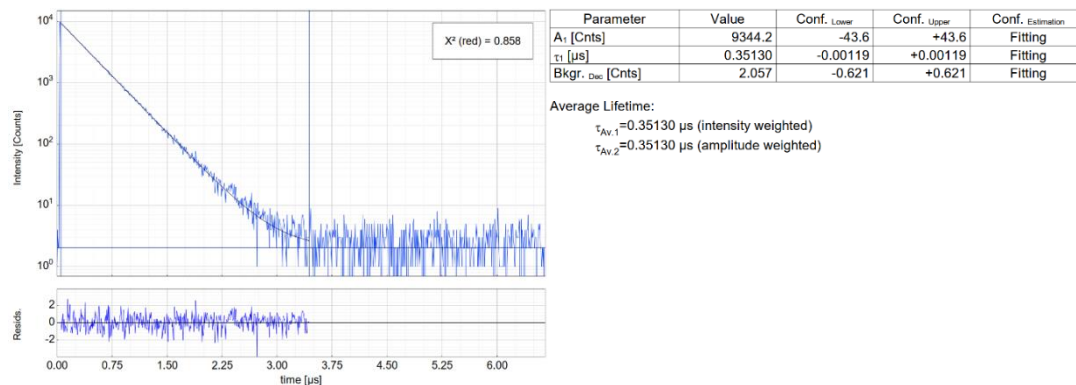

**Fig. S85** Left: Raw (experimental) time-resolved photoluminescence decay of [Pt(th(tbppy)py)CCF<sub>5</sub>] (**13**) in CH<sub>2</sub>Cl<sub>2</sub> at 298 K (air-equilibrated), including the residuals ( $\lambda_{exc} = 376.7 \text{ nm}$ ,  $\lambda_{em} = 620 \text{ nm}$ ). Right: Fitting parameters including pre-exponential factors and confidence limits.

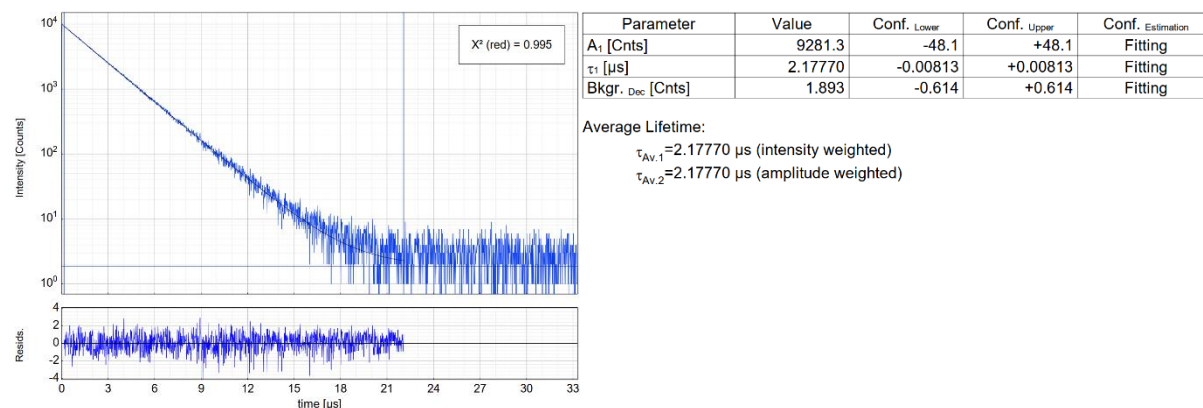

**Fig. S86** Left: Raw (experimental) time-resolved photoluminescence decay of [Pt(th(tbppy)py)CCF<sub>5</sub>] (**13**) in CH<sub>2</sub>Cl<sub>2</sub> at 298 K (Ar-purged), including the residuals ( $\lambda_{exc} = 376.7 \text{ nm}$ ,  $\lambda_{em} = 620 \text{ nm}$ ). Right: Fitting parameters including pre-exponential factors and confidence limits.

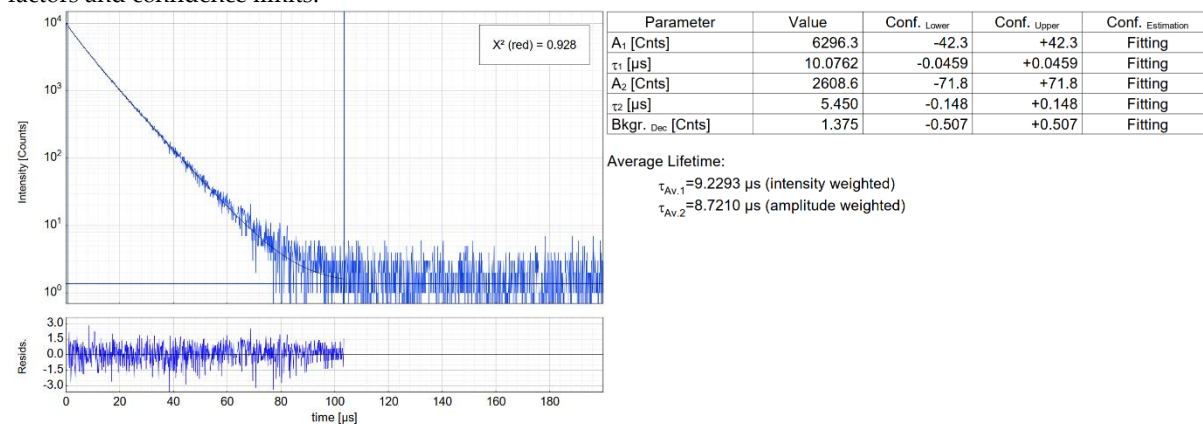

**Fig. S87** Left: Raw (experimental) time-resolved photoluminescence decay of [Pt(th(tbppy)py)CCF<sub>5</sub>] (**13**) in a frozen glassy CH<sub>2</sub>Cl<sub>2</sub>/MeOH matrix (V:V = 1:1) at 77 K, including the residuals ( $\lambda_{exc} = 376.7 \text{ nm}$ ,  $\lambda_{em} = 600 \text{ nm}$ ). Right: Fitting parameters including pre-exponential factors and confidence limits.

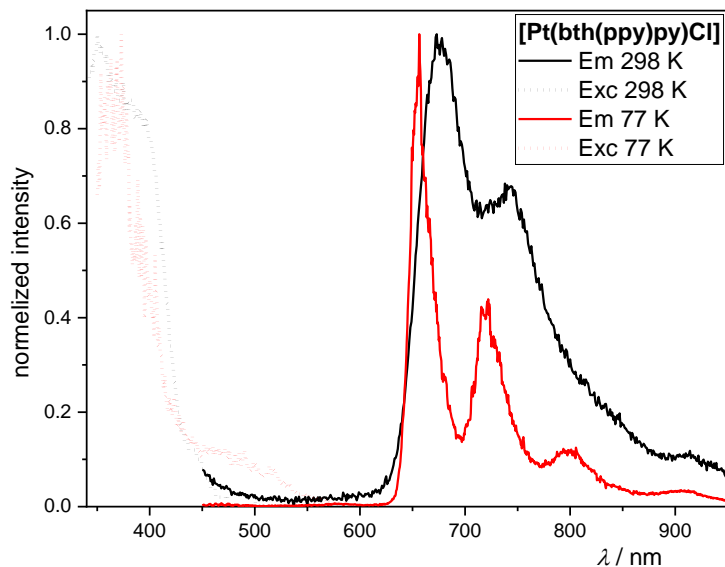

**Fig. S88** Excitation (dotted line) and emission spectra (solid line) of [Pt(bth(ppy)py)Cl] (**14**) ( $\lambda_{\text{exc}} = 350 \text{ nm}$ ;  $\lambda_{\text{em}} = 650 \text{ nm}$  at 298 K;  $\lambda_{\text{em}} = 660 \text{ nm}$  at 77 K) at 298 K (black) in  $\text{CH}_2\text{Cl}_2$  and at 77 K (red) in a frozen glassy  $\text{CH}_2\text{Cl}_2/\text{MeOH}$  matrix (V:V = 1:1). All solutions were optically diluted ( $A < 0.1$ ). Spectra normalised to the highest intensity.

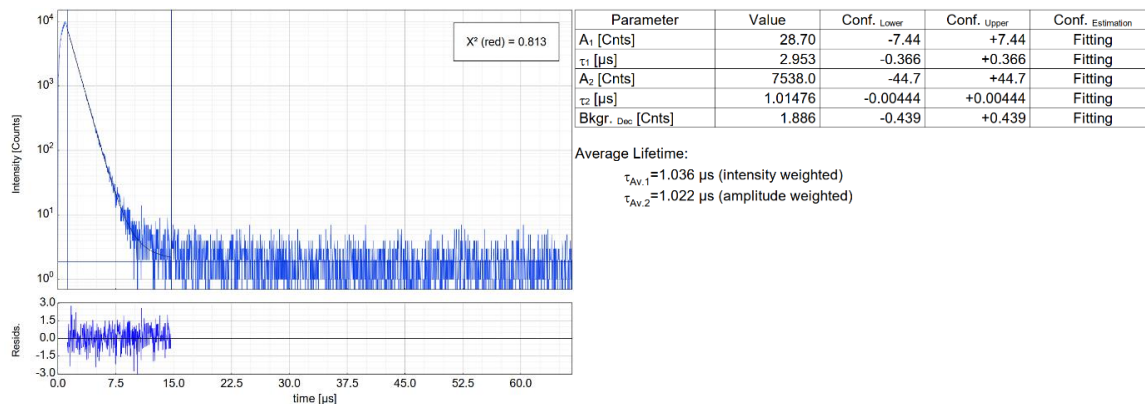

**Fig. S89** Left: Raw (experimental) time-resolved photoluminescence decay of [Pt(bth(ppy)py)Cl] (**14**) in  $\text{CH}_2\text{Cl}_2$  at 298 K (Ar-purged), including the residuals ( $\lambda_{\text{exc}} = 376.7 \text{ nm}$ ,  $\lambda_{\text{em}} = 670 \text{ nm}$ ). Right: Fitting parameters including pre-exponential factors and confidence limits.

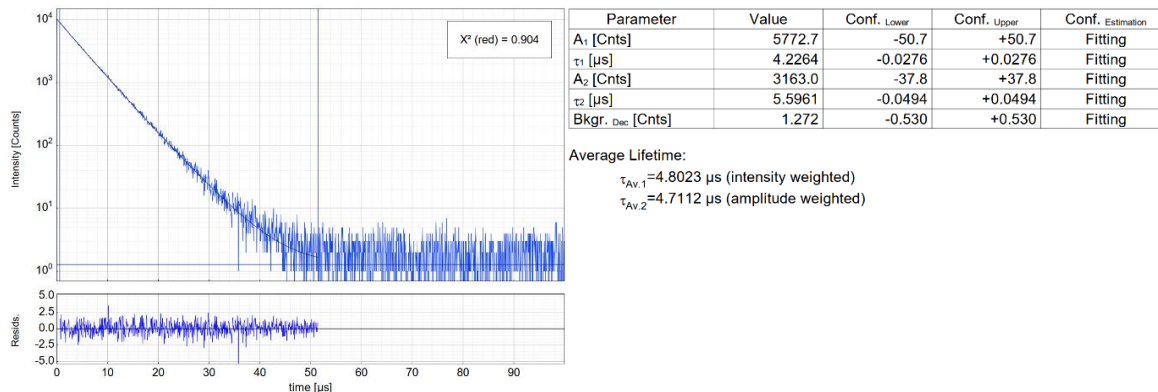

**Fig. S90** Left: Raw (experimental) time-resolved photoluminescence decay of [Pt(bth(ppy)py)Cl] (**14**) in a frozen glassy  $\text{CH}_2\text{Cl}_2/\text{MeOH}$  matrix (V:V = 1:1) at 77 K, including the residuals ( $\lambda_{\text{exc}} = 376.7 \text{ nm}$ ,  $\lambda_{\text{em}} = 660 \text{ nm}$ ). Right: Fitting parameters including pre-exponential factors and confidence limits.

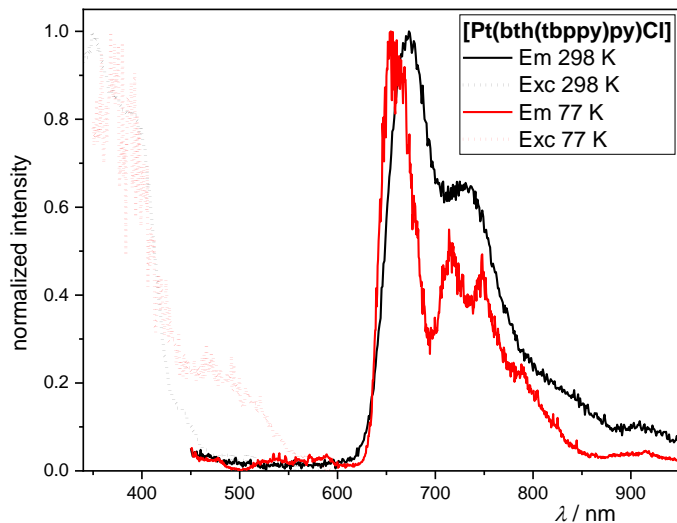

**Fig. S91** Excitation (dotted line) and emission spectra (solid line) of [Pt(bth(tbppy)py)Cl] (**15**) ( $\lambda_{\text{exc}} = 350 \text{ nm}$ ;  $\lambda_{\text{em}} = 650 \text{ nm}$  at 298 K;  $\lambda_{\text{em}} = 660 \text{ nm}$  at 77 K) at 298 K (black) in  $\text{CH}_2\text{Cl}_2$  and at 77 K (red) in a frozen glassy  $\text{CH}_2\text{Cl}_2/\text{MeOH}$  matrix (V:V = 1:1). All solutions were optically diluted ( $A < 0.1$ ). Spectra normalised to the highest intensity.

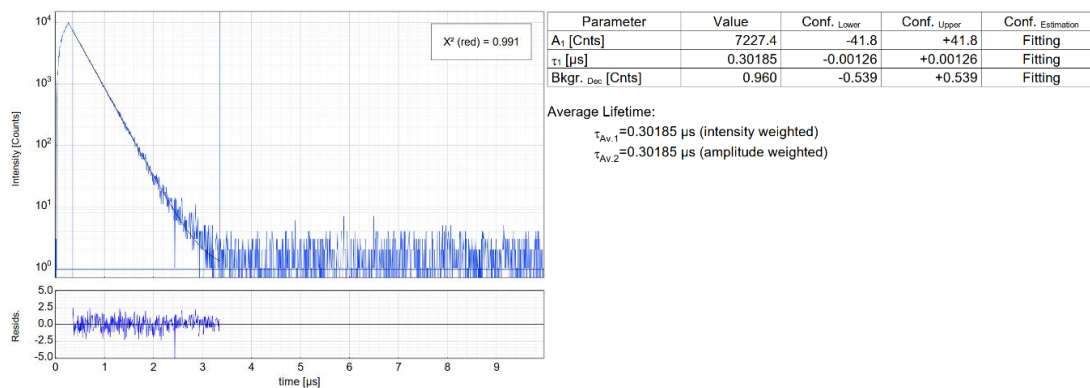

**Fig. S92** Left: Raw (experimental) time-resolved photoluminescence decay of [Pt(bth(tbppy)py)Cl] (**15**) in  $\text{CH}_2\text{Cl}_2$  at 298 K (air-equilibrated), including the residuals ( $\lambda_{\text{exc}} = 376.7 \text{ nm}$ ,  $\lambda_{\text{em}} = 670 \text{ nm}$ ). Right: Fitting parameters including pre-exponential factors and confidence limits.

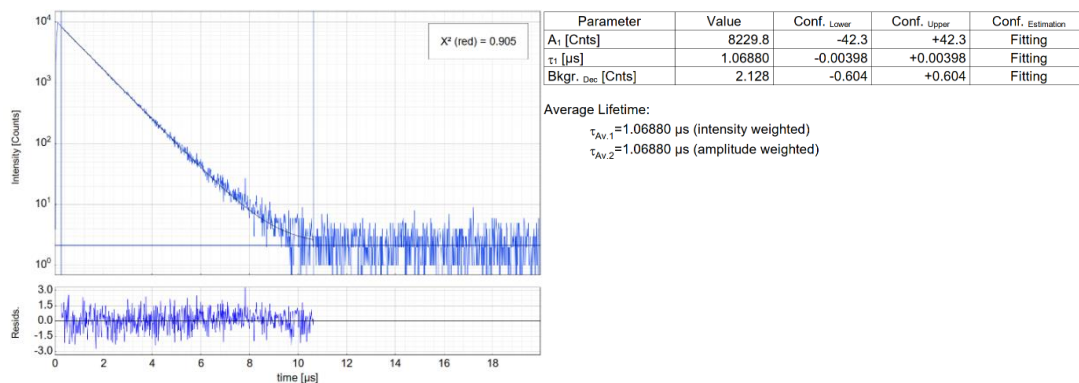

**Fig. S93** Left: Raw (experimental) time-resolved photoluminescence decay of [Pt(bth(tbppy)py)Cl] (**15**) in  $\text{CH}_2\text{Cl}_2$  at 298 K (Air-purged), including the residuals ( $\lambda_{\text{exc}} = 376.7 \text{ nm}$ ,  $\lambda_{\text{em}} = 670 \text{ nm}$ ). Right: Fitting parameters including pre-exponential factors and confidence limits.

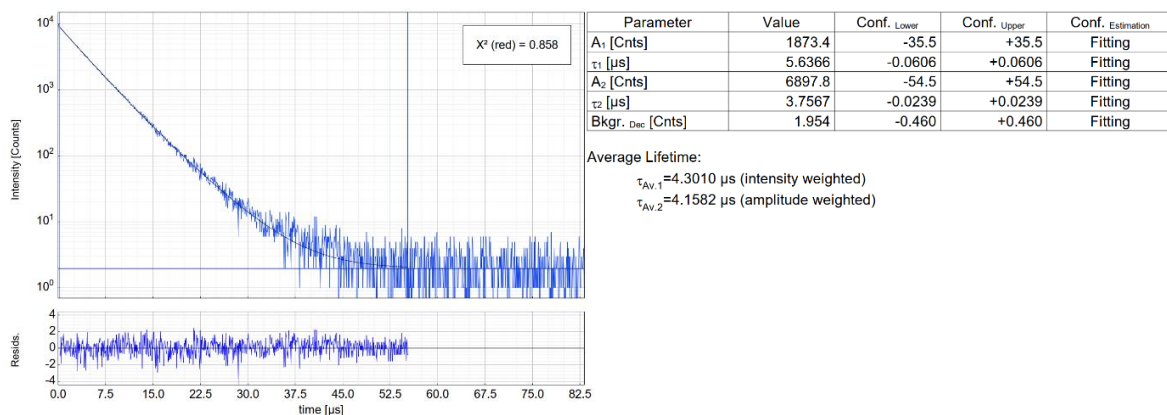

**Fig. S94** Left: Raw (experimental) time-resolved photoluminescence decay of [Pt(bth(tbppy)py)Cl] (**15**) in a frozen glassy CH<sub>2</sub>Cl<sub>2</sub>/MeOH matrix (V:V = 1:1) at 77 K, including the residuals ( $\lambda_{\text{exc}} = 376.7$  nm,  $\lambda_{\text{em}} = 660$  nm). Right: Fitting parameters including pre-exponential factors and confidence limits.

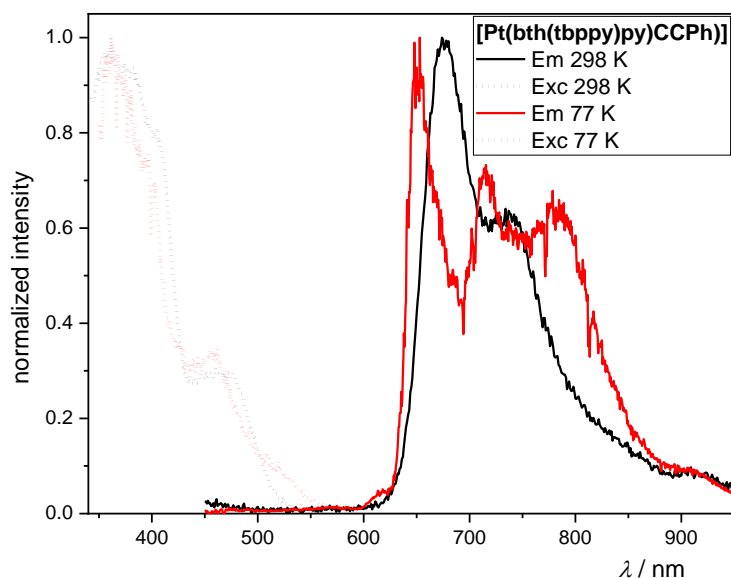

**Fig. S95** Excitation (dotted line) and emission spectra (solid line) of [Pt(bth(tbppy)py)CCPh] (**16**) ( $\lambda_{\text{exc}} = 350$  nm;  $\lambda_{\text{em}} = 650$  nm at 298 K;  $\lambda_{\text{em}} = 660$  nm at 77 K) at 298 K (black) in CH<sub>2</sub>Cl<sub>2</sub> and at 77 K (red) in a frozen glassy CH<sub>2</sub>Cl<sub>2</sub>/MeOH matrix (V:V = 1:1). All solutions were optically diluted ( $A < 0.1$ ). Spectra normalised to the highest intensity.

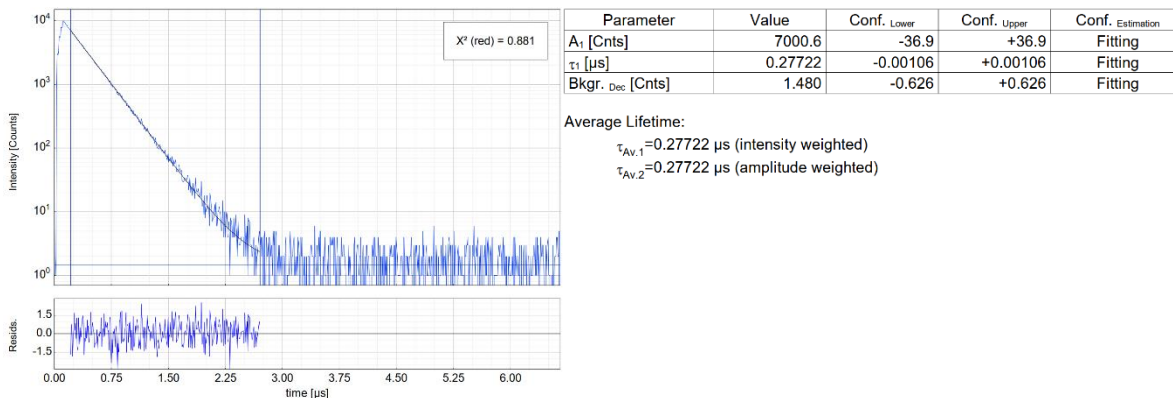

**Fig. S96** Left: Raw (experimental) time-resolved photoluminescence decay of [Pt(bth(tbppy)py)CCPh] (**16**) in CH<sub>2</sub>Cl<sub>2</sub> at 298 K (air-equilibrated), including the residuals ( $\lambda_{\text{exc}} = 376.7$  nm,  $\lambda_{\text{em}} = 675$  nm). Right: Fitting parameters including pre-exponential factors and confidence limits.

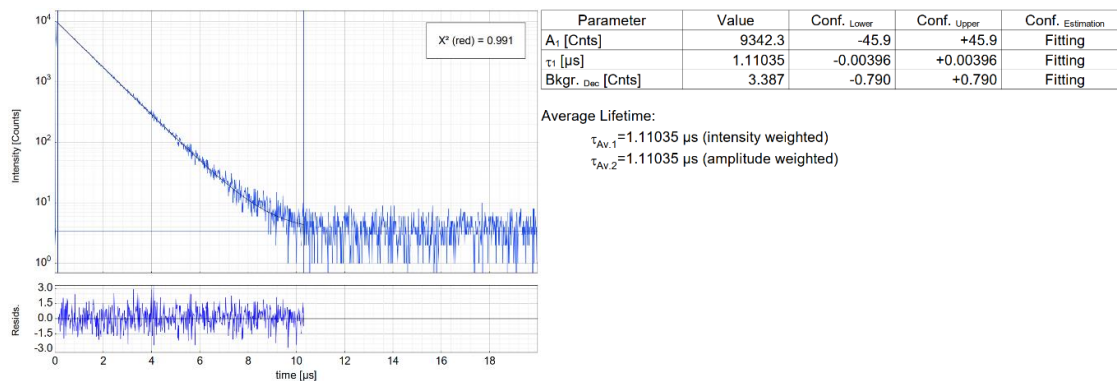

**Fig. S97** Left: Raw (experimental) time-resolved photoluminescence decay of [Pt(bth(tbppy)py)CCPh] (**16**) in CH<sub>2</sub>Cl<sub>2</sub> at 298 K (Ar-purged), including the residuals ( $\lambda_{exc} = 376.7$  nm,  $\lambda_{em} = 675$  nm). Right: Fitting parameters including pre-exponential factors and confidence limits.

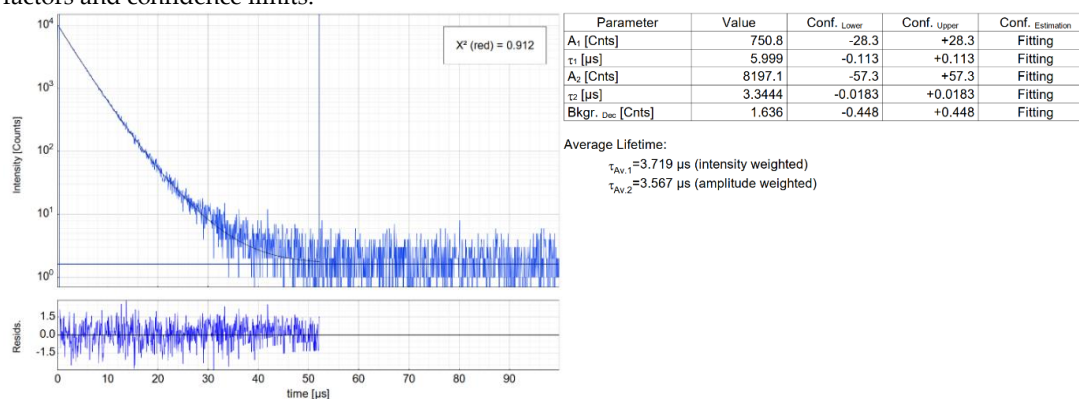

**Fig. S98** Left: Raw (experimental) time-resolved photoluminescence decay of [Pt(bth(tbppy)py)CCPh] (**16**) in a frozen glassy CH<sub>2</sub>Cl<sub>2</sub>/MeOH matrix (V:V = 1:1) at 77 K, including the residuals ( $\lambda_{exc} = 376.7$  nm,  $\lambda_{em} = 660$  nm). Right: Fitting parameters including pre-exponential factors and confidence limits.

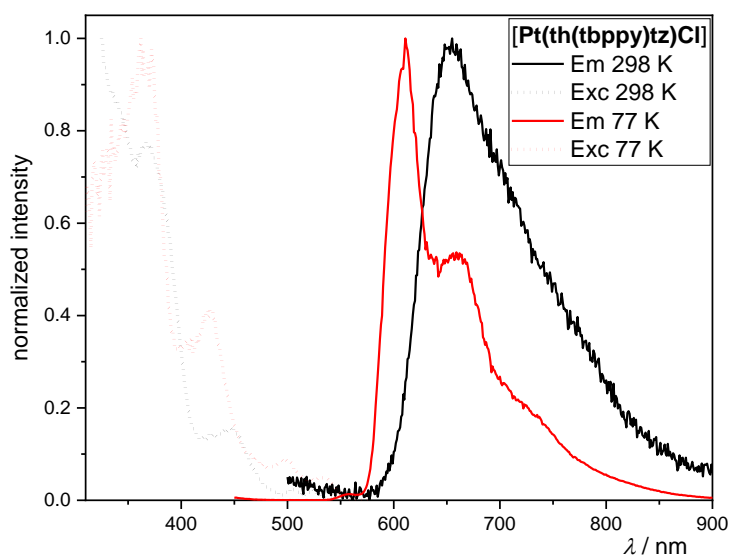

**Fig. S99** Excitation (dotted line) and emission spectra (solid line) of [Pt(th(tbppy)tz)Cl] (**17**) ( $\lambda_{exc} = 350$  nm;  $\lambda_{em} = 620$  nm at 298 K,  $\lambda_{em} = 600$  nm at 77 K) at 298 K (black) in CH<sub>2</sub>Cl<sub>2</sub> and at 77 K (red) in a frozen glassy CH<sub>2</sub>Cl<sub>2</sub>/MeOH matrix (V:V = 1:1). All solutions were optically diluted ( $A < 0.1$ ). Spectra normalised to the highest intensity.

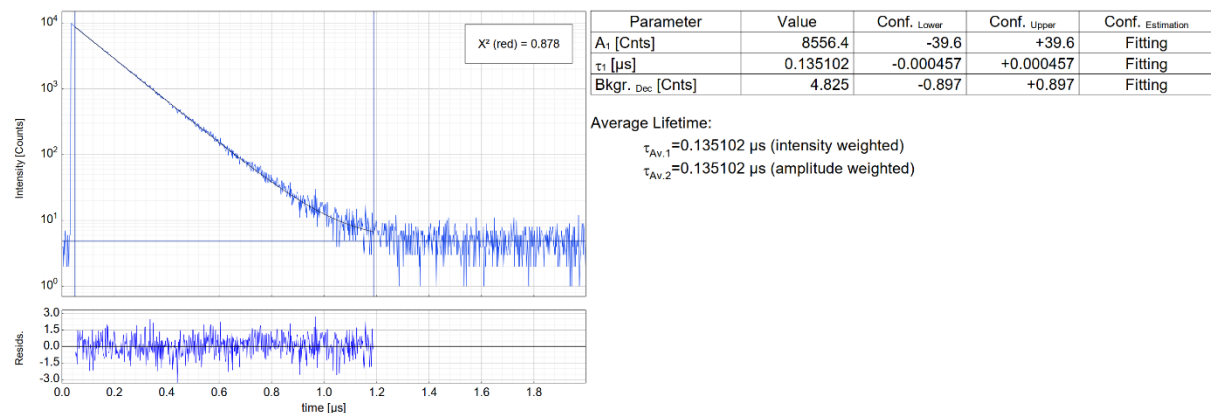

**Fig. S100** Left: Raw (experimental) time-resolved photoluminescence decay of [Pt(th(tbpp)tz)Cl] (**17**) in CH<sub>2</sub>Cl<sub>2</sub> at 298 K (air-equilibrated), including the residuals ( $\lambda_{\text{exc}} = 376.7$  nm,  $\lambda_{\text{em}} = 650$  nm). Right: Fitting parameters including pre-exponential factors and confidence limits.

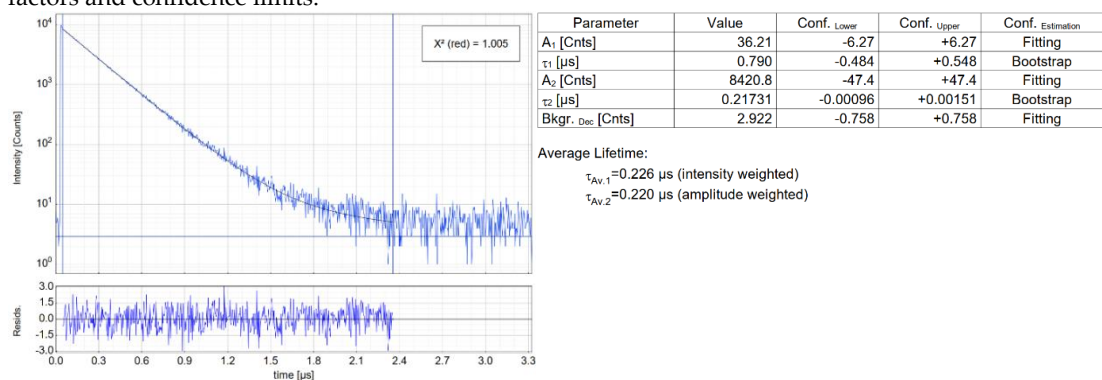

**Fig. S101** Left: Raw (experimental) time-resolved photoluminescence decay of [Pt(th(tbpp)tz)Cl] (**17**) in CH<sub>2</sub>Cl<sub>2</sub> at 298 K (Ar-purged), including the residuals ( $\lambda_{\text{exc}} = 376.7$  nm,  $\lambda_{\text{em}} = 650$  nm). Right: Fitting parameters including pre-exponential factors and confidence limits.

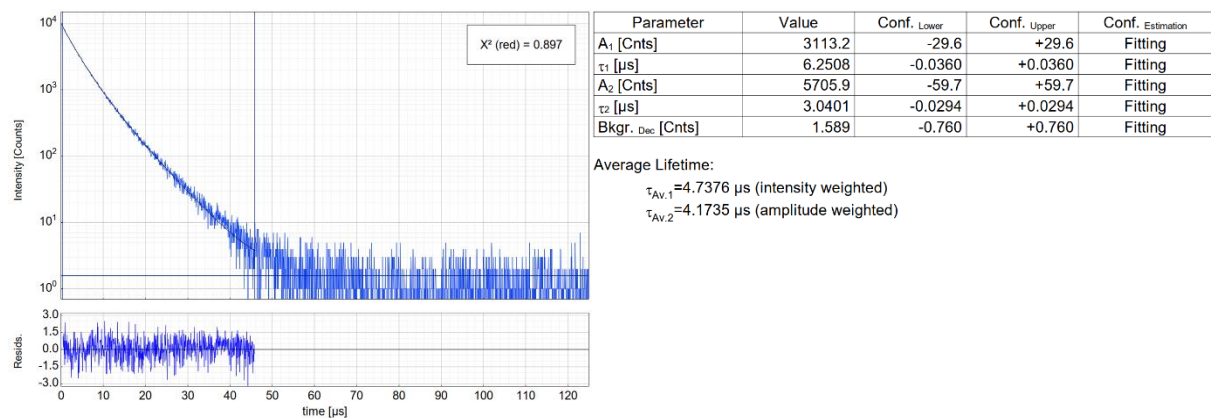

**Fig. S102** Left: Raw (experimental) time-resolved photoluminescence decay of [Pt(th(tbpp)tz)Cl] (**17**) in a frozen glassy CH<sub>2</sub>Cl<sub>2</sub>/MeOH matrix (V:V = 1:1) at 77 K, including the residuals ( $\lambda_{\text{exc}} = 376.7$  nm,  $\lambda_{\text{em}} = 600$  nm). Right: Fitting parameters including pre-exponential factors and confidence limits.



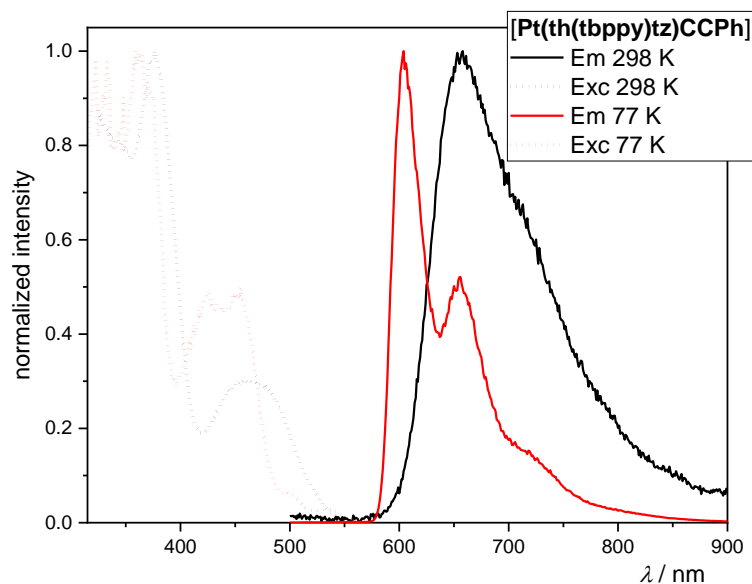

**Fig. S103** Excitation (dotted line) and emission spectra (solid line) of [Pt(th(tbppytz)CCPh) (**18**) ( $\lambda_{exc} = 350$  nm;  $\lambda_{em} = 620$  nm at 298 K,  $\lambda_{em} = 600$  nm at 77 K) at 298 K (black) in  $\text{CH}_2\text{Cl}_2$  and at 77 K (red) in a frozen glassy  $\text{CH}_2\text{Cl}_2/\text{MeOH}$  matrix (V:V = 1:1). All solutions were optically diluted ( $A < 0.1$ ). Spectra normalised to the highest intensity.

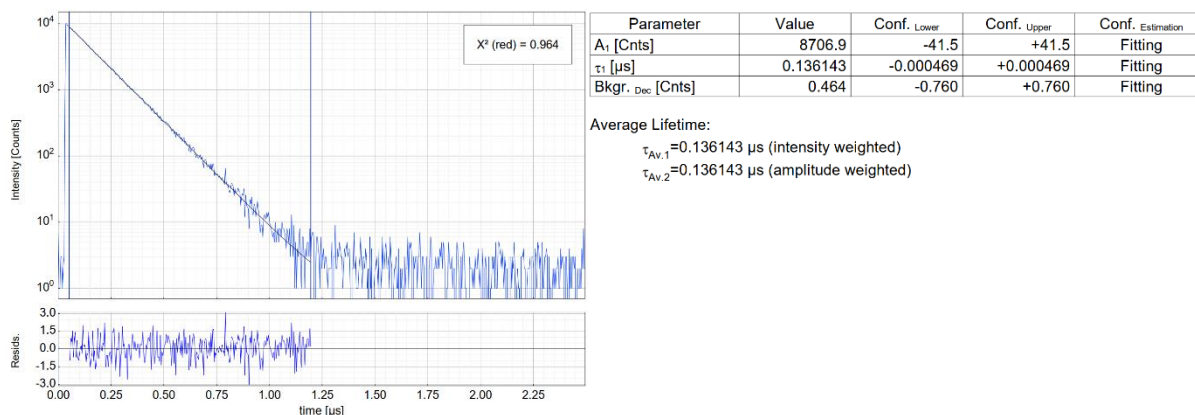

**Fig. S104** Left: Raw (experimental) time-resolved photoluminescence decay of [Pt(th(tbppytz)CCPh) (**18**) in  $\text{CH}_2\text{Cl}_2$  at 298 K (air-equilibrated), including the residuals ( $\lambda_{exc} = 376.7$  nm,  $\lambda_{em} = 650$  nm). Right: Fitting parameters including pre-exponential factors and confidence limits.

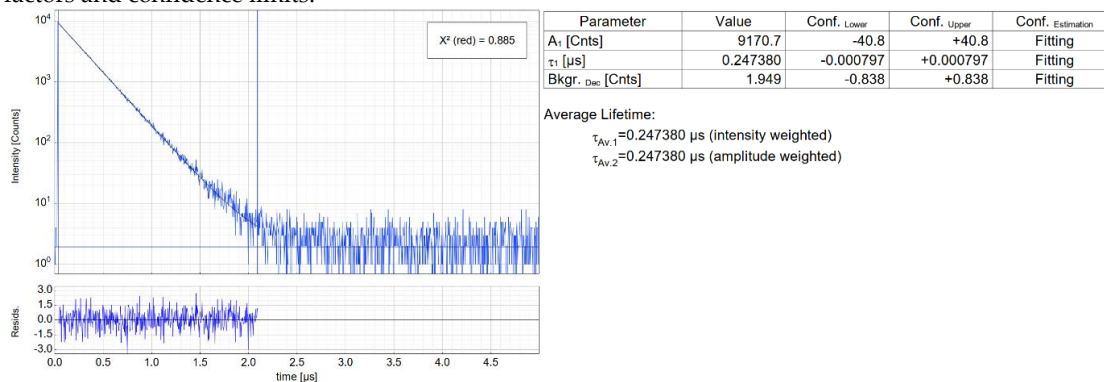

**Fig. S105** Left: Raw (experimental) time-resolved photoluminescence decay of [Pt(th(tbppytz)CCPh) (**18**) in  $\text{CH}_2\text{Cl}_2$  at 298 K (Ar-purged), including the residuals ( $\lambda_{exc} = 376.7$  nm,  $\lambda_{em} = 650$  nm). Right: Fitting parameters including pre-exponential factors and confidence limits.

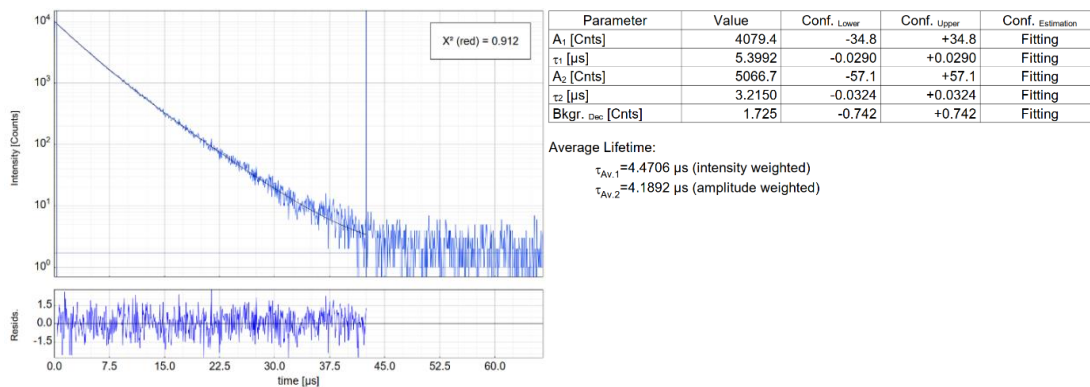

**Fig. S106** Left: Raw (experimental) time-resolved photoluminescence decay of [Pt(th(tbppy)tz)CCPh] (**18**) in a frozen glassy CH<sub>2</sub>Cl<sub>2</sub>/MeOH matrix (V:V = 1:1) at 77 K, including the residuals ( $\lambda_{exc}$  = 376.7 nm,  $\lambda_{em}$  = 600 nm). Right: Fitting parameters including pre-exponential factors and confidence limits.

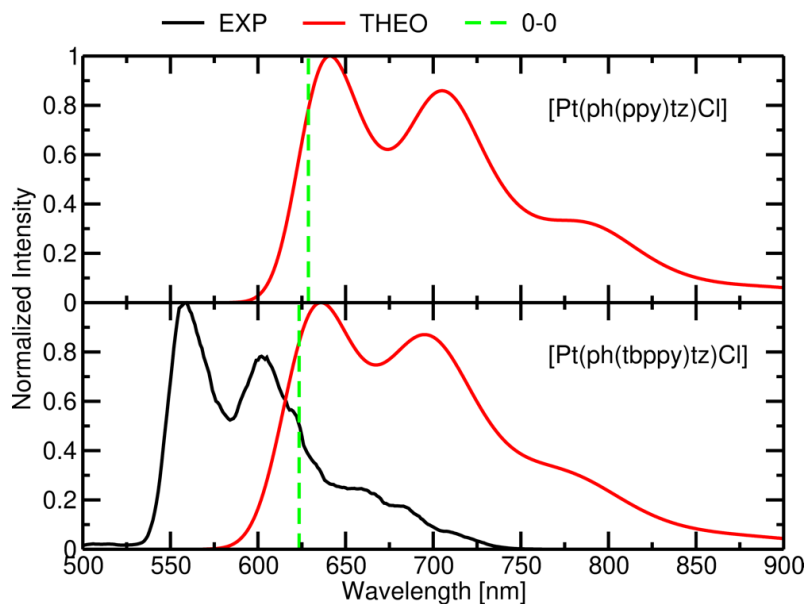

**Fig. S107** TD-DFT-calculated emission spectra (THEO, red) compared to experimental spectra at 77 K (EXP, black). Theoretical 0-0 transitions are shown as vertical dashed green lines. Upper panel: complex **1** [Pt(ph(ppy)tz)Cl]. Lower panel complex **2** [Pt(ph(tbppy)tz)Cl].

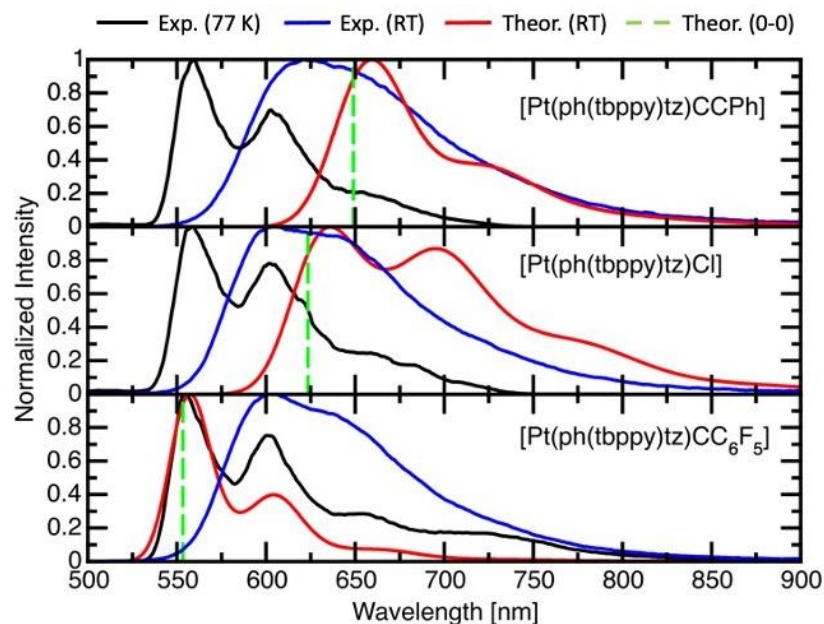

**Fig. S108** TD-DFT-calculated emission spectra (Theor, red) compared to experimental spectra (EXP, black) for complexes of **class A** complexes at 77 K. Theoretical 0–0 transitions are shown as vertical dashed green lines. Upper panel: complex 3 [Pt(ph(tbppy)tz)C≡CPh]. Middle panel: complex 2 [Pt(ph(tbppy)tz)Cl]. Lower panel: complex 4 [Pt(ph(tbppy)tz)C≡CC<sub>6</sub>F<sub>5</sub>].

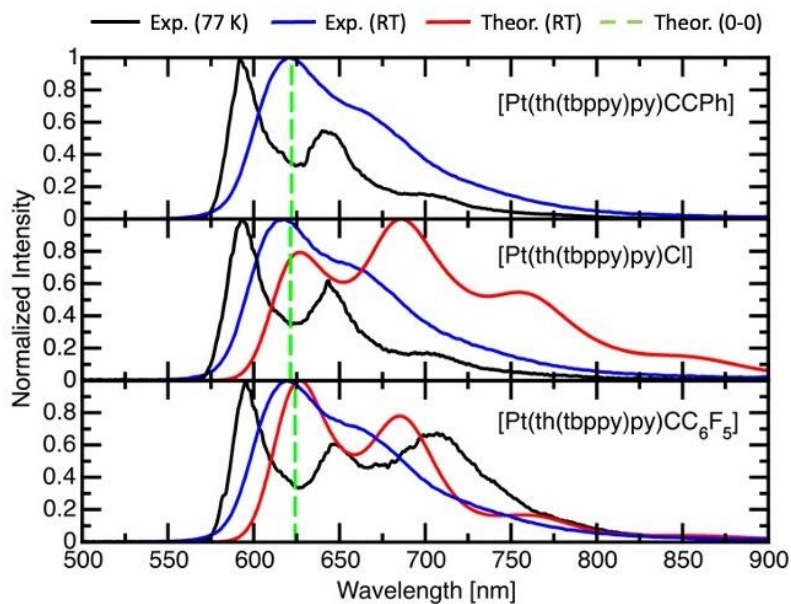

**Fig. S109** TD-DFT-calculated emission spectra (Theor, red) of **class B** complexes compared to experimental spectra (EXP, black) at 77 K. Calculated 0–0 transitions are shown as vertical dashed green lines. Upper panel: complex 12 [Pt(th(tbppy)py)C≡CPh]. Middle panel: complex 11 [Pt(th(tbppy)py)Cl]. Lower panel: complex 13 [Pt(th(tbppy)py)C≡CC<sub>6</sub>F<sub>5</sub>].

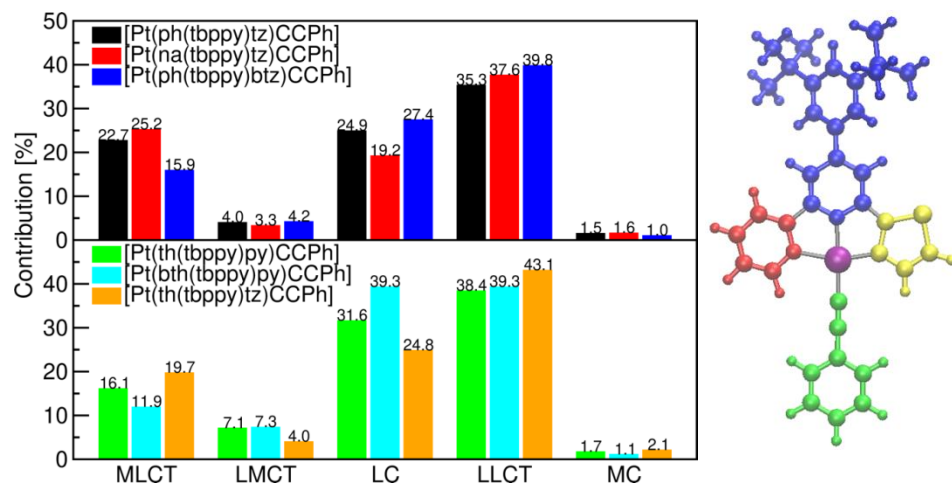

**Fig. S110** Left: Decomposition of the emissive  $T_1$  states into MLCT, LMCT, LC, LLCT, and MC contributions of complexes **3**, **6**, **9** (top), and **12**, **16**, **18** (bottom). Right: Molecular partitioning used for the example of complex **3**, all other complexes were partitioned in an analogous manner.

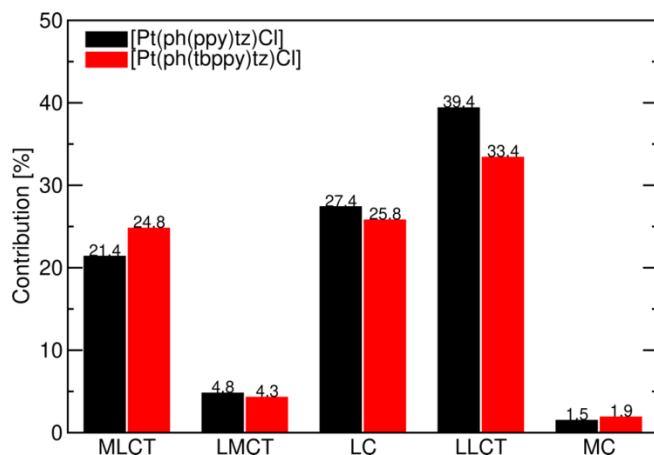

**Fig. S111** Decomposition of the emissive  $T_1$  states into MLCT, LMCT, LC, LLCT, and MC contributions of [Pt(ph(ppy)tz)Cl] (**1**) and [Pt(ph(tbppy)tz)Cl] (**2**).

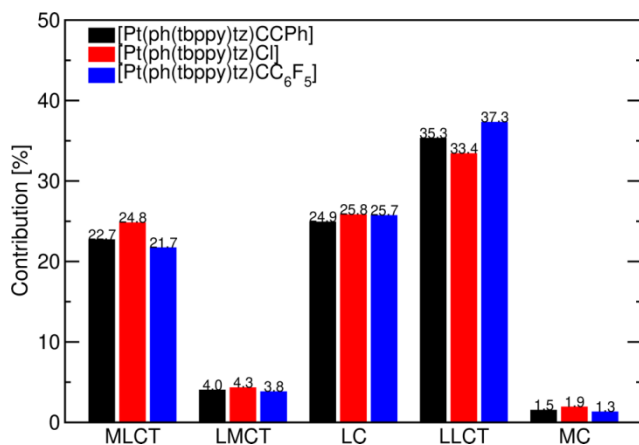

**Fig. S112** Decomposition of the emissive  $T_1$  states into MLCT, LMCT, LC, LLCT, and MC contributions for **class A** complexes (black: complex **3**) [Pt(ph(tbppy)tz)CCPh], red: complex **2**) [Pt(ph(tbppy)tz)Cl], blue: complex **4**) [Pt(ph(tbppy)tz)CC<sub>6</sub>F<sub>5</sub>]).

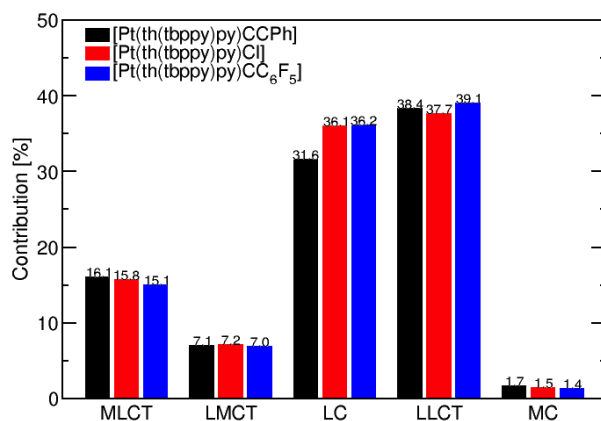

**Fig. S113** Decomposition of the emissive  $T_1$  states into MLCT, LMCT, LC, LLCT, and MC contributions for **class B** complexes (black: [Pt(th(tbbpy)py)(C≡CPh)] (**12**), red: [Pt(th(tbbpy)py)Cl] (**11**), blue: [Pt(th(tbbpy)py)(C≡CC<sub>6</sub>F<sub>5</sub>)] (**13**)).

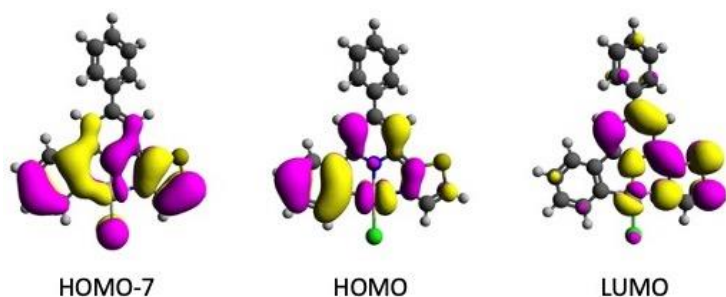

**Fig. S114** Molecular orbitals of complex (**1**) with the largest contributions to the emissive  $T_1$  state.

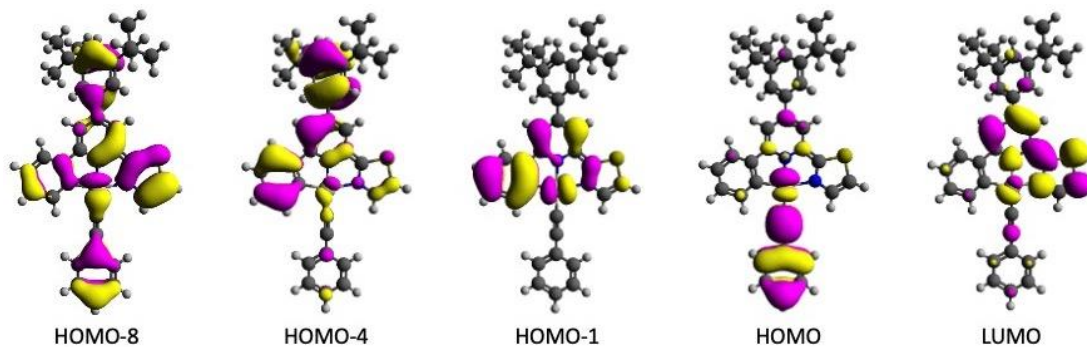

**Fig. S115** Molecular orbitals of complex (**3**) with the largest contributions to the emissive  $T_1$  state.

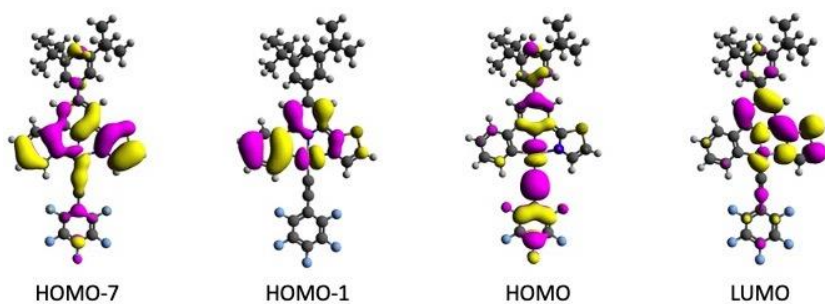

**Fig. S116** Molecular orbitals of complex (**4**) with the largest contributions to the emissive  $T_1$  state.

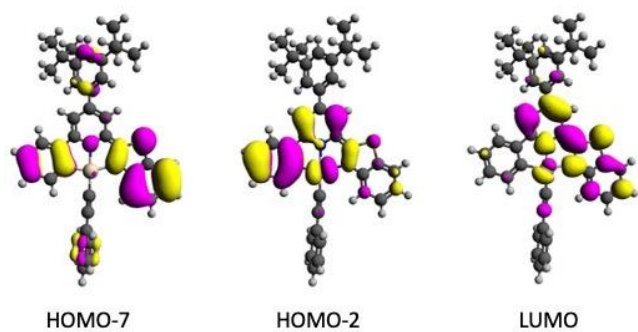

Fig. S117 Molecular orbitals of complex (9) with the largest contributors to the emissive  $T_1$  state.

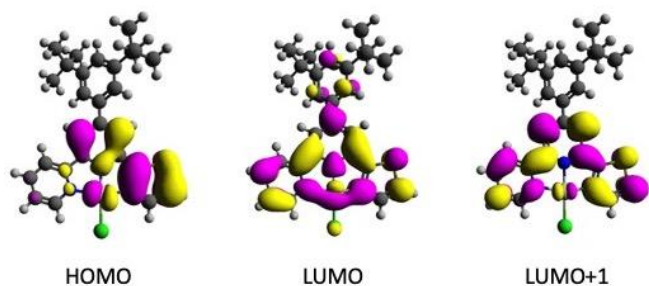

Fig. S118 Molecular orbitals of complex (11) with the largest contributions to the emissive  $T_1$  state.

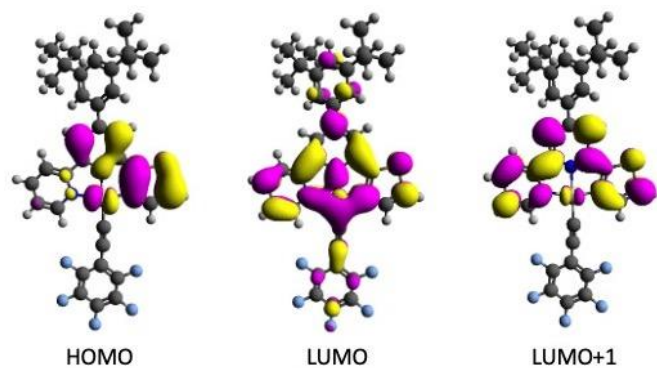

Fig. S119 Molecular orbitals of complex (12) with the largest contributions to the emissive  $T_1$  state.

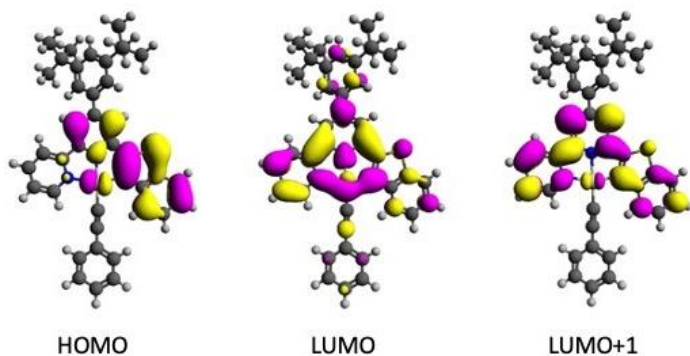

Fig. S120 Molecular orbitals of complex (16) with the largest contributions to the emissive  $T_1$  state.

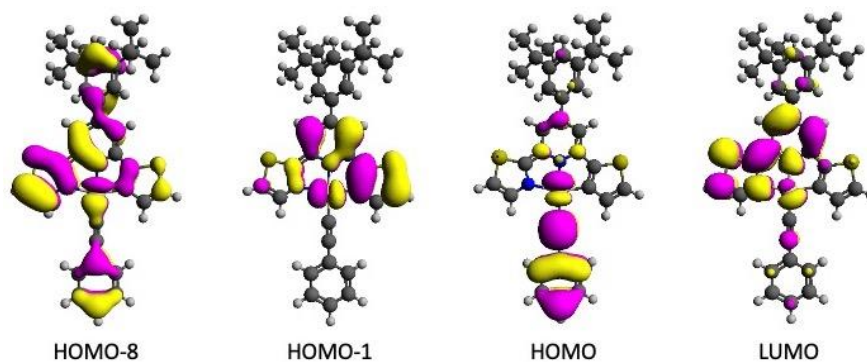

Fig. S121 Molecular orbitals of complex (18) with the largest contributions to the emissive  $T_1$  state.

## Supporting Tables

**Table S1** Selected structure solution and refinement data for  $[\text{Pt}(\text{th}(\text{ppy})\text{py})\text{Cl}]\text{CD}_2\text{Cl}_2$  (**10-CH<sub>2</sub>Cl<sub>2</sub>**) and  $[\text{Pt}(\text{ph}(\text{tbbpy})\text{btz})(\text{CCPh})]$  (**9**).

| Complex                              | $[\text{Pt}(\text{th}(\text{ppy})\text{py})\text{Cl}]\text{CH}_2\text{Cl}_2$ ( <b>10-CH<sub>2</sub>Cl<sub>2</sub></b> ) | $[\text{Pt}(\text{ph}(\text{tbbpy})\text{btz})(\text{CCPh})]$ ( <b>9</b> ) <sup>a</sup> |
|--------------------------------------|-------------------------------------------------------------------------------------------------------------------------|-----------------------------------------------------------------------------------------|
| Formula                              | $\text{C}_{20}\text{H}_{13}\text{N}_2\text{SPtCl}\text{CD}_2\text{Cl}_2$                                                | $\text{C}_{40}\text{H}_{36}\text{N}_2\text{PtS}$                                        |
| Molecular weight                     | 1253.67                                                                                                                 | 771.86                                                                                  |
| Temperature                          | 170(2) K                                                                                                                | 100(2) K                                                                                |
| Radiation wavelength                 | 0.71073 Å                                                                                                               | 0.56076 Å (synchrotron)                                                                 |
| Crystal system                       | triclinic                                                                                                               | Monoclinic                                                                              |
| Space group                          | $P\bar{1}$ (No. 2)                                                                                                      | $P 2_1/c$ (No. 14)                                                                      |
| Cell parameters                      | $a = 7.9533(7)$ Å                                                                                                       | $a = 13.1805(4)$ Å                                                                      |
|                                      | $b = 9.8707(8)$ Å                                                                                                       | $b = 37.3146(19)$ Å                                                                     |
|                                      | $c = 14.3097(11)$ Å                                                                                                     | $c = 6.7184(2)$ Å                                                                       |
|                                      | $\alpha = 102.887(6)^\circ$                                                                                             |                                                                                         |
|                                      | $\beta = 103.515(6)^\circ$                                                                                              | $\beta = 100.192(3)^\circ$                                                              |
|                                      | $\gamma = 102.960(6)^\circ$                                                                                             |                                                                                         |
| Volume                               | 1018.48(15) Å <sup>3</sup>                                                                                              | 3252.1(2) Å <sup>3</sup>                                                                |
| Z                                    | 2                                                                                                                       | 4                                                                                       |
| Density calculated                   | 2.052 g/cm <sup>3</sup>                                                                                                 | 1.576 g/cm <sup>3</sup>                                                                 |
| Absorption coefficient               | 7.397 mm <sup>-1</sup>                                                                                                  | 2.400 mm <sup>-1</sup>                                                                  |
| F(000)                               | 601                                                                                                                     | 1536                                                                                    |
| Theta range for data collection      | 2.213 to 29.293°                                                                                                        | 1.729 to 25.650°.                                                                       |
| Index ranges                         | $-10 \leq h \leq 10, -12 \leq k \leq 13, -19 \leq l \leq 19$                                                            | $-20 \leq h \leq 20, -53 \leq k \leq 53, -8 \leq l \leq 8$                              |
| Reflections collected                | 13115                                                                                                                   | 45728                                                                                   |
| Independent reflections              | 5443 [ $R_{\text{int}} = 0.0794$ ]                                                                                      | 10542 [ $R_{\text{int}} = 0.0982$ ]                                                     |
| Completeness to theta                | theta = 19.661°: 99.8%                                                                                                  | theta = 19.661°: 97.0%                                                                  |
| Refinement method                    | Full-matrix least-squares on $F^2$                                                                                      | Full-matrix least-squares on $F^2$                                                      |
| Data / restraints / parameters       | 5443 / 0 / 254                                                                                                          | 10542 / 0 / 404                                                                         |
| Goodness-of-fit on $F^2$             | 0.982                                                                                                                   | 1.064                                                                                   |
| Final R indices [ $I > 2\sigma(I)$ ] | $R_1 = 0.0493, wR_2 = 0.1175$                                                                                           | $R_1 = 0.00736, wR_2 = 0.1626$                                                          |
| R indices (all data)                 | $R_1 = 0.0709, wR_2 = 0.1300$                                                                                           | $R_1 = 0.1287, wR_2 = 0.1854$                                                           |
| Extinction coefficient               | 0.0082(9)                                                                                                               | 0.0015(3)                                                                               |
| Largest diff. peak and hole          | 1.96 and $-2.29 \text{ e.Å}^{-3}$                                                                                       | 3.90 and $-4.21 \text{ e.Å}^{-3}$                                                       |
| CCDC                                 | 2081667                                                                                                                 | 2084095                                                                                 |

The dataset for 9 is generally poor and A alerts appeared in the checkcif. The problem is due to poor quality of the crystal.

**Table S2** Selected structural data for  $[\text{Pt}(\text{th}(\text{ppy})\text{py})\text{Cl}]\text{CH}_2\text{Cl}_2$  (**10-CH<sub>2</sub>Cl<sub>2</sub>**) and  $[\text{Pt}(\text{ph}(\text{tbbpy})\text{btz})(\text{CCPh})]$  (**9**).

| distances (Å)           | [Pt(th(ppy)py)Cl]CD <sub>2</sub> Cl <sub>2</sub> ( <b>10</b> CH <sub>2</sub> Cl <sub>2</sub> ) | distances (Å)  | [Pt(ph(tbppy)btz)(CCPh)] ( <b>9</b> ) |
|-------------------------|------------------------------------------------------------------------------------------------|----------------|---------------------------------------|
| Pt–C1                   | 1.983(7)                                                                                       | Pt–C1          | 1.99(1)                               |
| Pt–N1                   | 1.957(6)                                                                                       | Pt–N1          | 2.00(7)                               |
| Pt–N2                   | 2.109(5)                                                                                       | Pt–N2          | 2.13(7)                               |
| Pt–Cl                   | 2.293(3)                                                                                       | Pt–C33         | 1.98(1)                               |
| C4–C20                  | 1.45(1)                                                                                        | C12–C11        | 1.46(1)                               |
| C30–C24                 | 1.49(1)                                                                                        | C6–C7          | 1.47(1)                               |
| angles (°)              |                                                                                                | angles (°)     |                                       |
| Cl–Pt–N1                | 178.8(2)                                                                                       | C33–Pt–N1      | 175.3(4)                              |
| C1–Pt–N2                | 161.3(3)                                                                                       | C1–Pt–N2       | 159.1(3)                              |
| C1–Pt–N1                | 82.2(3)                                                                                        | C1–Pt–N1       | 81.4(3)                               |
| N1–Pt–N2                | 79.1(2)                                                                                        | N1–Pt–N2       | 77.6(3)                               |
| Cl–Pt–C1                | 98.6(3)                                                                                        | C33–Pt–C1      | 93.9(4)                               |
| Cl–Pt–N2                | 100.0(2)                                                                                       | C33–Pt–N2      | 107.1(4)                              |
| C3–S1–C4                | 90.4(4)                                                                                        | C14–S1–C12     | 89.3(5)                               |
| C1–C4–C20–C21           | 176.7(9)                                                                                       | C1–C6–C7–C8    | 175.8(9)                              |
| N2–C30–C24–C23          | 178.0(8)                                                                                       | N2–C12–C11–C10 | 179.5(9)                              |
| C2–C1–C4–C20            | 175.0(8)                                                                                       | C13–N2–C12–C11 | 179.6(8)                              |
| C21–C22–C40–C45         | 38.8(11)                                                                                       | C8–C9–C19–C24  | 33.2(14)                              |
| Sum of angles around Pt | 360                                                                                            |                | 360                                   |

**Table S3** Redox potentials of the HC<sup>^</sup>N<sup>^</sup>N protoligands.<sup>a</sup>

|               | $E_{1/2}$ (Red1) | $E_{pc}$ (Red2) | $E_{pc}$ (Red3) |
|---------------|------------------|-----------------|-----------------|
| Hth(ppy)py    | -2.53            | -3.28           |                 |
| Hth(tbppy)py  | -2.57            | -3.39           |                 |
| Hbth(ppy)py   | -2.58            | -3.04           | -3.18           |
| Hbth(tbppy)py | -2.51            | -2.92           | -3.05           |
| Hph(ppy)tz    | -2.44            | -3.22           |                 |
| Hph(tbppy)tz  | -2.50            | -2.75           | -3.43           |
| Hna(ppy)tz    | -2.44            | -3.02           |                 |
| Hna(tbppy)tz  | -2.45            | -3.07           |                 |
| Hth(tbppy)tz  | -2.41            |                 |                 |
| Hph(ppy)btz   | -2.26            | -2.76           | -3.19           |
| Hph(tbppy)btz | -2.31            | -2.89           | -3.27           |

<sup>a</sup> Electrochemical potentials [V],  $E_{1/2}$  for reversible redox waves,  $E_{pc}$  for irreversible reduction waves, measured in 0.1 M *n*-Bu<sub>4</sub>NPF<sub>6</sub>/THF at 298 K, scan rate 100 mV/s.

**Table S4** Selected redox potentials of [Pt(C<sup>^</sup>N<sup>^</sup>N)(Cl/R)] complexes.<sup>a</sup>

| C <sup>^</sup> N <sup>^</sup> N | X                 | Number | Ox (in CH <sub>2</sub> Cl <sub>2</sub> ) |               | Red (in THF)       |                    |             | $\Delta E$ |
|---------------------------------|-------------------|--------|------------------------------------------|---------------|--------------------|--------------------|-------------|------------|
|                                 |                   |        | $E_{pa}$ ox 2                            | $E_{pa}$ ox 1 | $E_{1/2}$ red 1    | $E_{1/2}$ red 2    | red 2–red 1 |            |
| ph(ppy)tz                       | Cl                | (1)    | -                                        | 0.46          | -1.64              | -2.32              | 0.68        | 2.10       |
| ph(tbppy)tz                     | Cl                | (2)    | 1.14                                     | 0.67          | -1.64              | -2.34              | 0.70        | 2.31       |
| ph(tbppy)tz                     | CCPh              | (3)    | 0.60                                     | 0.39          | -1.66              | -2.33              | 0.67        | 2.05       |
| ph(tbppy)tz                     | CCCF <sub>5</sub> | (4)    | 1.02                                     | 0.55          | -1.62              | -2.25              | 0.63        | 2.17       |
| na(ppy)tz                       | Cl                | (5)    | 1.08                                     | 0.40          | -1.63              | -2.28              | 0.65        | 2.03       |
| na(tbppy)tz                     | CCPh              | (6)    | 0.62                                     | 0.34          | -1.66              | -2.33              | 0.67        | 2.00       |
| ph(ppy)btz                      | Cl                | (7)    | 1.16                                     | 0.53          | -1.48              | -2.13              | 0.65        | 2.01       |
| ph(tbppy)btz                    | Cl                | (8)    | 1.16                                     | 0.61          | -1.51              | -2.17              | 0.66        | 2.12       |
| ph(tbppy)btz                    | CCPh              | (9)    | 0.57                                     | 0.17          | -1.54 <sup>b</sup> | -2.20 <sup>b</sup> | 0.66        | 1.71       |
| th(ppy)py                       | Cl                | (10)   | -                                        | 0.55          | -1.76              | -2.40              | 0.64        | 2.28       |
| th(tbppy)py                     | Cl                | (11)   | 1.22                                     | 0.86          | -1.76              | -2.42              | 0.66        | 2.62       |
| th(tbppy)py                     | CCPh              | (12)   | 0.74                                     | 0.42          | -1.74              | -2.38              | 0.64        | 2.16       |



|              |                  |      |      |      |       |       |      |      |
|--------------|------------------|------|------|------|-------|-------|------|------|
| th(tbppy)py  | CCF <sub>5</sub> | (13) | 0.91 | 0.32 | -1.72 | -2.30 | 0.58 | 2.04 |
| bth(ppy)py   | Cl               | (14) | -    | 0.48 | -1.65 | -2.30 | 0.62 | 2.16 |
| bth(tbppy)py | Cl               | (15) | 1.09 | 0.55 | -1.70 | -2.35 | 0.65 | 2.25 |
| bth(tbppy)py | CCPh             | (16) | 0.42 | 0.19 | -1.71 | -2.33 | 0.62 | 1.90 |
| th(tbppy)tz  | Cl               | (17) | 0.75 | 0.59 | -1.64 | -2.33 | 0.69 | 2.23 |
| th(tbppy)tz  | CCPh             | (18) | 0.76 | 0.40 | -1.64 | -2.32 | 0.68 | 2.04 |

<sup>a</sup> Plots in Figs S5-S26, this ESI. Electrochemical potentials [V] with an accuracy of  $\pm 0.003$  V, vs ferrocene/ferrocenium;  $E_{1/2}$  for reversible redox waves,  $E_{pc}$  for irreversible reduction waves and  $E_{pa}$  for irreversible oxidation waves; measured in 0.1 M *n*Bu<sub>4</sub>NPF<sub>6</sub>/CH<sub>2</sub>Cl<sub>2</sub> or THF at 298 K, scan rate 100 mV/s, oxidations measured in CH<sub>2</sub>Cl<sub>2</sub>, reductions in THF. <sup>b</sup> Measured in CH<sub>2</sub>Cl<sub>2</sub>.

**Table S5** UV-vis absorption maxima of HC<sup>^N^N</sup> protoligands.<sup>a</sup>

| HC <sup>^N^N</sup> | $\lambda_1$ ( $\epsilon$ ) | $\lambda_2$ ( $\epsilon$ ) | $\lambda_3$ ( $\epsilon$ ) | $\lambda_4$ ( $\epsilon$ ) | $\lambda_5$ ( $\epsilon$ ) | $\lambda_6$ ( $\epsilon$ ) |
|--------------------|----------------------------|----------------------------|----------------------------|----------------------------|----------------------------|----------------------------|
| Hph(ppy)tz         | 257sh (2.96)               | 266 (3.42)                 | -                          | 299sh (1.20)               | 325 (1.13)                 | 344sh (0.46)               |
| Hph(tbppy)tz       | -                          | 273 (3.65)                 | -                          | -                          | 325 (1.21)                 | 340sh (0.74)               |
| Hna(tbppy)tz       | -                          | 266 (4.02)                 | 286 (3.48)                 | 299sh (2.71)               | 333 (1.14)                 | 347sh (0.69)               |
| Hph(ppy)btz        | 257 (4.25)                 | 271 (3.99)                 | -                          | 286sh (3.22)               | 329 (2.29)                 | 342 (2.05)                 |
| Hph(tbppy)btz      | 258 (2.88)                 | 275 (3.19)                 | -                          | -                          | 329 (1.70)                 | 341 (1.60)                 |
| Hth(ppy)py         | 250 (3.67)                 | 280 (3.18)                 | -                          | 306sh (1.88)               | 328 (1.46)                 | 350sh (0.56)               |
| Hth(tbppy)py       | 252 (1.98)                 | 282 (2.63)                 | -                          | -                          | 328 (0.92)                 | 350sh (0.27)               |
| Hbth(ppy)py        | 255 (2.53)                 | 284 (2.22)                 | -                          | 317sh (1.82)               | 327 (1.82)                 | 353sh (0.75)               |
| Hbth(tbppy)py      | 261 (2.39)                 | 284 (2.85)                 | -                          | 318sh (1.72)               | 327 (1.69)                 | 354sh (0.44)               |
| Hth(tbppy)tz       | -                          | 280 (3.15)                 | -                          | -                          | 326 (1.16)                 | 349 (0.45)                 |

<sup>a</sup> Measured in CH<sub>2</sub>Cl<sub>2</sub> (298 K), sh = shoulder, wavelength  $\lambda$  in nm, extinction coefficients  $\epsilon$  in 10<sup>4</sup> M<sup>-1</sup>cm<sup>-1</sup>.

**Table S6** UV-vis absorption maxima of the [Pt(C<sup>^N^N</sup>)X] complexes.<sup>a</sup>

| C <sup>^N^N</sup> | X                |      | $\lambda_1$ ( $\epsilon$ ) | $\lambda_2$ ( $\epsilon$ ) | $\lambda_3$ ( $\epsilon$ ) | $\lambda_4$ ( $\epsilon$ ) | $\lambda_5$ ( $\epsilon$ ) | $\lambda_6$ ( $\epsilon$ ) | $\lambda_7$ ( $\epsilon$ ) | $\lambda_8$ ( $\epsilon$ ) | $\lambda_9$ ( $\epsilon$ ) | $\lambda_{10}$ ( $\epsilon$ ) |
|-------------------|------------------|------|----------------------------|----------------------------|----------------------------|----------------------------|----------------------------|----------------------------|----------------------------|----------------------------|----------------------------|-------------------------------|
| ph(ppy)tz         | Cl               | (1)  |                            | -                          | 296 (2.82)                 | 321sh (1.71)               | 337 (1.86)                 | 373 (1.25)                 | -                          | 426sh (0.49)               | 447 (0.44)                 | 501sh (0.09)                  |
| ph(tbppy)tz       | Cl               | (2)  | 271sh (1.99)               |                            | 297 (2.81)                 |                            | 338 (2.02)                 | 373 (1.04)                 | -                          | 425sh (0.36)               | 448 (0.40)                 | 499sh (0.05)                  |
|                   | CCPh             | (3)  | 273sh (4.04)               | 285 (4.24)                 | 298 (4.14)                 |                            | 339 (2.22)                 | 377 (1.58)                 | -                          | 444sh (0.67)               | 466 (0.75)                 | 545sh (0.07)                  |
|                   | CCF <sub>5</sub> | (4)  |                            | 274sh (2.88)               | 298 (3.29)                 |                            | 338 (1.95)                 | 371 (1.39)                 | -                          | 435sh (0.66)               | 454 (0.68)                 | 509sh (0.06)                  |
| na(tbppy)tz       | Cl               | (5)  | 250 (2.61)                 |                            | 297 (2.96)                 |                            | 337 (2.19)                 | 369 (1.22)                 |                            | 430sh (0.44)               | 445 (0.49)                 | 500sh (0.02)                  |
|                   | CCPh             | (6)  |                            | 284 (5.09)                 | 300 (5.29)                 | 308sh (5.12)               | 331sh (3.02)               | 369 (1.88)                 | 398sh (1.32)               | 413sh (0.81)               | 463 (0.88)                 | 527sh (0.18)                  |
| ph(ppy)btz        | Cl               | (7)  |                            | -                          | 305 (2.86)                 | 320sh (2.48)               | 352 (2.46)                 | 384 (1.26)                 | -                          | 440sh (0.32)               | 466 (0.35)                 | 515sh (0.08)                  |
| ph(tbppy)btz      | Cl               | (8)  |                            | 271sh (3.58)               | 306 (4.34)                 | 323sh (3.07)               | 350 (3.87)                 | 382sh (1.91)               | -                          | 438sh (0.46)               | 466 (0.51)                 | 514sh (0.10)                  |
|                   | CCPh             | (9)  |                            | 270 (3.54)                 | 301 (3.16)                 | 323sh (2.28)               | 348 (2.28)                 | 384 (1.51)                 | -                          | 476 (0.56)                 | 505 (0.52)                 | 574sh (0.05)                  |
| th(ppy)py         | Cl               | (10) |                            | -                          | 287sh (3.39)               | 298 (3.58)                 | 335sh (1.86)               | 367 (1.51)                 | 384sh (1.35)               | -                          | 435 (0.41)                 | 491sh (0.04)                  |
| th(tbppy)py       | Cl               | (11) |                            | -                          | 284 (2.23)                 | 310 (2.66)                 | 336sh (1.59)               | 366 (1.19)                 | 380sh (1.11)               | -                          | 435 (0.33)                 | 489sh (0.04)                  |
|                   | CCPh             | (12) |                            | 273 (2.42)                 | 290 (2.40)                 | 306 (2.19)                 | 323sh (1.85)               | 373 (1.26)                 | -                          | 440 (0.51)                 | 467sh (0.45)               | 517sh (0.04)                  |
|                   | CCF <sub>5</sub> | (13) |                            | 270sh (2.71)               | 285 (3.23)                 | 313 (2.87)                 | 341sh (1.89)               | 371 (1.72)                 | -                          | 424sh (0.76)               | 443 (0.79)                 | 501sh (0.05)                  |

|              |      |      |                 |                 |               |                 |               |                 |               |               |                 |
|--------------|------|------|-----------------|-----------------|---------------|-----------------|---------------|-----------------|---------------|---------------|-----------------|
| bth(ppy)py   | Cl   | (14) | -               | 291<br>(3.64)   |               | 351<br>(1.97)   | 385<br>(1.66) | -               | -             | 439<br>(0.27) | 495sh<br>(0.06) |
| bth(tbppy)py | Cl   | (15) | -               | 287<br>(3.96)   | 310<br>(3.43) | 349<br>(2.50)   | 387<br>(1.96) | -               | -             | 440<br>(0.34) | 496<br>(0.07)   |
|              | CCPh | (16) | 272sh<br>(2.98) | 287<br>(3.02)   | 296<br>(2.91) | 355<br>(1.64)   | 381<br>(1.53) | -               | 407<br>(1.28) | 469<br>(0.43) | 541sh<br>(0.02) |
| th(tbppy)tz  | Cl   | (17) | -               | 290sh<br>(2.48) | 306<br>(2.92) | 327sh<br>(2.15) | 359<br>(1.64) | 380sh<br>(1.15) | -             | 436<br>(0.35) | 505sh<br>(0.05) |
|              | CCPh | (18) | 286<br>(2.86)   | 299<br>(2.80)   | 300<br>(2.79) | 318sh<br>(2.21) | 367<br>(2.18) | 381sh<br>(1.55) | 441<br>(0.68) | 468<br>(0.63) | 560sh<br>(0.06) |

<sup>a</sup> Measured in CH<sub>2</sub>Cl<sub>2</sub> (298 K), sh = shoulder, wavelength  $\lambda$  in nm, extinction coefficients  $\epsilon$  in 10<sup>4</sup> M<sup>-1</sup>cm<sup>-1</sup>.

**Table S7** Complete emission data and PLYQs, as well as excited state lifetime data for each complex in CH<sub>2</sub>Cl<sub>2</sub> at 298 K and in frozen glassy matrix of CH<sub>2</sub>Cl<sub>2</sub>/MeOH (V:V = 1:1) at 77 K. For multiexponential decays, the amplitude-weighted average lifetimes are given as well as the different components in square brackets with relative amplitudes as percentages in parentheses.

| class    | Complex                     | Medium (T/K)                                | $\lambda_{em}$  | $\lambda_{exc}$        | $\tau_{av}^a$                                     | $\Phi \pm 0.02/\pm 0.05$ |
|----------|-----------------------------|---------------------------------------------|-----------------|------------------------|---------------------------------------------------|--------------------------|
| <b>B</b> | [Pt(th(ppy)py)Cl] (10)      | CH <sub>2</sub> Cl <sub>2</sub> , air (298) | 621, 660 sh     | 341, 450               | n.d.                                              | < 0.02                   |
|          |                             | CH <sub>2</sub> Cl <sub>2</sub> , Ar (298)  |                 |                        | 5.04 ± 0.24 [5.49 ± 0.06 (89); 1.3 ± 0.6 (11)]    | 0.05                     |
|          |                             | glassy matrix (77)                          | 598, 650, 710   | 320, 367, 426          | 11.0 ± 0.4 [12.34 ± 0.10 (79); 6.1 ± 0.5 (21)]    | 0.39                     |
|          | [Pt(bth(ppy)py)Cl] (14)     | CH <sub>2</sub> Cl <sub>2</sub> , air (298) | 675, 745        | 350, 400, 450sh        | n.d.                                              | < 0.02                   |
|          |                             | CH <sub>2</sub> Cl <sub>2</sub> , Ar (298)  |                 |                        | 1.022 ± 0.029 [3.0 ± 0.7 (1); 1.015 ± 0.009 (99)] | 0.02                     |
|          |                             | glassy matrix (77)                          | 655, 720, 800   | 373, 400               | 4.71 ± 0.17 [5.60 ± 0.10 (35); 4.23 ± 0.06 (65)]  | 0.23                     |
|          | [Pt(th(tbppy)py)Cl] (11)    | CH <sub>2</sub> Cl <sub>2</sub> , air (298) | 617, 660 sh     | 315, 370, 440          | 0.3393 ± 0.0022                                   | < 0.02                   |
|          |                             | CH <sub>2</sub> Cl <sub>2</sub> , Ar (298)  |                 |                        | 1.809 ± 0.013                                     | 0.07                     |
|          |                             | glassy matrix (77)                          | 595, 645, 700   | 375, 425, 470sh, 490sh | 11.6 ± 0.9 [13.17 ± 0.14 (59); 9.32 ± 0.26 (41)]  | 0.58                     |
|          | [Pt(bth(tbppy)py)Cl] (15)   | CH <sub>2</sub> Cl <sub>2</sub> , air (298) | 675, 730        | 350, 395, 440sh        | 0.3019 ± 0.0025                                   | < 0.02                   |
|          |                             | CH <sub>2</sub> Cl <sub>2</sub> , Ar (298)  |                 |                        | 1.069 ± 0.008                                     | 0.03                     |
|          |                             | glassy matrix (77)                          | 655, 720, 745   | 375, 480               | 4.16 ± 0.16 [5.64 ± 0.12 (21); 3.76 ± 0.05 (79)]  | 0.13                     |
|          | [Pt(th(tbppy)py)CCPh] (12)  | CH <sub>2</sub> Cl <sub>2</sub> , air (298) | 620, 660sh      | 300, 373, 440, 475sh   | 0.3146 ± 0.0020                                   | 0.04                     |
|          |                             | CH <sub>2</sub> Cl <sub>2</sub> , Ar (298)  |                 |                        | 1.628 ± 0.012                                     | 0.14                     |
|          |                             | glassy matrix (77)                          | 590, 640, 700sh | 360, 425sh, 460        | 8.2 ± 0.3 [9.69 ± 0.15 (37); 7.39 ± 0.11 (63)]    | 0.79                     |
|          | [Pt(bth(tbppy)py)CCPh] (16) | CH <sub>2</sub> Cl <sub>2</sub> , air (298) | 675, 740        | 360, 380sh, 405sh, 475 | 0.2772 ± 0.0021                                   | < 0.02                   |
|          |                             | CH <sub>2</sub> Cl <sub>2</sub> , Ar (298)  |                 |                        | 1.110 ± 0.008                                     | 0.04                     |
|          |                             | glassy                                      | 650, 720, 785   | 365, 400sh, 460        | 3.57 ± 0.13 [6.00 ± 0.23 (8);                     | 0.24                     |

|                                                          |                                                           |                                                 |                         |                                                     |                                                             |                   |        |
|----------------------------------------------------------|-----------------------------------------------------------|-------------------------------------------------|-------------------------|-----------------------------------------------------|-------------------------------------------------------------|-------------------|--------|
|                                                          |                                                           | matrix (77)                                     |                         |                                                     |                                                             | 3.34 ± 0.03 (92)] |        |
|                                                          | [Pt(th(tbpppy)py)CC <sub>6</sub> F <sub>5</sub> ]<br>(13) | CH <sub>2</sub> Cl <sub>2</sub> , air<br>(298)  | 620, 660 sh             | 312, 370, 425sh,<br>445                             | 0.3513 ± 0.0023                                             |                   | 0.03   |
| CH <sub>2</sub> Cl <sub>2</sub> , Ar<br>(298)            |                                                           | 2.178 ± 0.016                                   |                         |                                                     | 0.15                                                        |                   |        |
| glassy<br>matrix (77)                                    |                                                           | 595, 650, 705                                   | 350-375, 430            | 8.7 ± 0.3 [10.08 ± 0.09 (71); 5.5<br>± 0.3 (29)]    |                                                             | 0.79              |        |
| A                                                        | [Pt(ph(tbpppy)btz)Cl]<br>(8)                              | CH <sub>2</sub> Cl <sub>2</sub> M, air<br>(298) | 635, 675sh              | 353, 464                                            | 0.1832 ± 0.0014                                             |                   | < 0.02 |
|                                                          |                                                           | CH <sub>2</sub> Cl <sub>2</sub> , Ar<br>(298)   |                         |                                                     | 0.2057 ± 0.0018                                             |                   | < 0.02 |
|                                                          |                                                           | glassy<br>matrix (77)                           | 600, 656,<br>710sh      | 346, 425, 452                                       | 1.59 ± 0.06 [1.871 ± 0.022 (53);<br>1.28 ± 0.03 (47)]       |                   | 0.07   |
|                                                          | [Pt(ph(tbpppy)tz)CCPh]<br>(3)                             | CH <sub>2</sub> Cl <sub>2</sub> , air<br>(298)  | 626, 645sh              | 302, 346, 380,<br>443sh, 473,<br>495sh              | 0.1891 ± 0.0014                                             |                   | 0.03   |
|                                                          |                                                           | CH <sub>2</sub> Cl <sub>2</sub> , Ar<br>(298)   |                         |                                                     | 0.39 ± 0.04 [0.78 ± 0.04(3);<br>0.375 ± 0.003 (97)]         |                   | 0.06   |
|                                                          |                                                           | glassy<br>matrix (77)                           | 558, 605,<br>660sh      | 336, 370, 425,<br>438, 468                          | 3.50 ± 0.12 [5.59 ± 0.24 (8);<br>3.31 ± 0.03 (92)]          |                   | 0.62   |
|                                                          | [Pt(na(tbpppy)tz)CCPh]<br>(6)                             | CH <sub>2</sub> Cl <sub>2</sub> , air<br>(298)  | 635                     | 311, 335sh, 370,<br>398, 420sh, 468                 | 0.200 ± 0.007 [0.2105 ± 0.0016<br>(84); 0.147 ± 0.011 (16)] |                   | 0.05   |
|                                                          |                                                           | CH <sub>2</sub> Cl <sub>2</sub> , Ar<br>(298)   |                         |                                                     | 0.407 ± 0.014 [0.97 ± 0.07 (2);<br>0.395 ± 0.004 (98)]      |                   | 0.10   |
|                                                          |                                                           | glassy<br>matrix (77)                           | 555, 595,<br>(650sh)    | 330, 395, 437,<br>463                               | 3.97 ± 0.16 [4.29 ± 0.04 (67);<br>3.33 ± 0.12 (33)]         |                   | 0.82   |
|                                                          | [Pt(ph(tbpppy)btz)CCPh]<br>(9)                            | CH <sub>2</sub> Cl <sub>2</sub> , air<br>(298)  | 655                     | 360, 470, 500sh                                     | 0.089 ± 0.003 [0.116 ± 0.004<br>(14); 0.0844 ± 0.0008 (86)] |                   | < 0.02 |
|                                                          |                                                           | CH <sub>2</sub> Cl <sub>2</sub> , Ar<br>(298)   |                         |                                                     | 0.112 ± 0.004 [0.262 ± 0.019<br>(2); 0.1085 ± 0.0010 (98)]  |                   | < 0.02 |
|                                                          |                                                           | glassy<br>matrix (77)                           | 600, 650,<br>700sh      | 360, 470, 500sh                                     | 1.70 ± 0.06 [2.25 ± 0.04 (25);<br>1.52 ± 0.02 (75)]         |                   | 0.18   |
| [Pt(ph(tbpppy)tz)CC <sub>6</sub> F <sub>5</sub> ]<br>(4) | CH <sub>2</sub> Cl <sub>2</sub> , air<br>(298)            | 605, 635sh                                      | 345, 370, 445sh,<br>465 | 0.3195 ± 0.0025                                     |                                                             | 0.05              |        |
|                                                          | CH <sub>2</sub> Cl <sub>2</sub> , Ar<br>(298)             |                                                 |                         | 0.91 ± 0.03 [2.7 ± 0.4 (1); 0.899<br>± 0.008 (99)]  |                                                             | 0.12              |        |
|                                                          | glassy<br>matrix (77)                                     | 555, 600,<br>655sh, 725sh                       | 340, 365, 420,<br>445   | 3.53 ± 0.12 [4.61 ± 0.14 (13);<br>3.37 ± 0.03 (87)] |                                                             | 0.49              |        |
| C                                                        | [Pt(th(tbpppy)tz)Cl]<br>(17)                              | CH <sub>2</sub> Cl <sub>2</sub> , air<br>(298)  | 655                     | 368, 450                                            | 0.1351 ± 0.0009                                             |                   | < 0.02 |
|                                                          |                                                           | CH <sub>2</sub> Cl <sub>2</sub> , Ar<br>(298)   |                         |                                                     | 0.220 ± 0.010 [0.8 ± 0.8 (0.4);<br>0.2173 ± 0.0020 (99.6)]  |                   | < 0.02 |
|                                                          |                                                           | glassy<br>matrix (77)                           | 610, 660,<br>725sh      | 364, 430, 503sh                                     | 4.17 ± 0.15 [6.25 ± 0.07 (35);<br>3.04 ± 0.06 (65)]         |                   | 0.13   |
|                                                          | [Pt(th(tbpppy)tz)CCPh]<br>(18)                            | CH <sub>2</sub> Cl <sub>2</sub> , air<br>(298)  | 658                     | 375, 470                                            | 0.1361 ± 0.0009                                             |                   | < 0.02 |
|                                                          |                                                           | CH <sub>2</sub> Cl <sub>2</sub> , Ar<br>(298)   |                         |                                                     | 0.2474 ± 0.0016                                             |                   | < 0.02 |
|                                                          |                                                           | glassy<br>matrix (77)                           | 604, 657,<br>725sh      | 365, 425, 454                                       | 4.19 ± 0.14 [5.40 ± 0.06 (45);<br>3.22 ± 0.06 (55)]         |                   | 0.35   |

<sup>a</sup> We attribute the biexponential lifetimes in fluid solution to different conformations that can be thermally accessed while possessing comparable excited-state character yet different deactivation rates. Moreover, diverse emitting states could coexist in thermal equilibrium, which might be influenced by the microenvironment affecting the excited states' character (particularly in frozen glassy matrices or in solid samples).

**Table S8.** Selected photophysical properties of previously reported Pt(II)-complexes.<sup>a</sup>

| class    | complex                                                     | $\lambda_{em}$ (nm) | $\tau$ ( $\mu$ s) | $\Phi_L$ <sup>b</sup> |
|----------|-------------------------------------------------------------|---------------------|-------------------|-----------------------|
|          | [Pt(ph(tbppy)2-quin)Cl]                                     | 624                 | <0.2 $\mu$ s      | <0.001                |
| <b>D</b> | [Pt(ph(tbppy)1-isoquin)Cl]                                  | 621                 | <0.2              | <0.001                |
|          | [Pt(ph(tbppy)3-isoquin)Cl]                                  | 530, 566(sh)        | 7.6               | 0.78                  |
|          | [Pt(ph(tbppy)3-isoquin)(CCC <sub>6</sub> F <sub>5</sub> )]  | 521, 556(sh)        | 7.6               | 0.99                  |
|          | [Pt(2,4-F <sub>2</sub> ph(tbppy)3-isoquin)Cl] <sup>c</sup>  | 528, 565(sh)        | 2.0               | 0.14                  |
|          | [Pt(2-MeOph(tbppy)3-isoquin)Cl] <sup>c</sup>                | 585                 | 3.3               | 0.23                  |
|          | [Pt(2-CF <sub>3</sub> ph(tbppy)3-isoquin)Cl] <sup>c</sup>   | 534, 569(sh)        | 8.9               | 0.63                  |
| <b>E</b> | [Pt(2,3F <sub>2</sub> ph(tbppy)3-isoquin)Cl] <sup>c</sup>   | 529, 565(sh)        | 8.9               | 0.65                  |
|          | [Pt(1,3-F <sub>2</sub> ph(tbppy)3-isoquin)Cl] <sup>c</sup>  | 529, 561(sh)        | 10.1              | 0.69                  |
|          | [Pt(1-F,3-MeOph(tbppy)3-isoquin)Cl] <sup>c</sup>            | 529, 561(sh)        | 9.5               | 0.73                  |
|          | [Pt(2-NO <sub>2</sub> ph(tbppy)3-isoquin)Cl] <sup>c</sup>   | 529, 565, 622 (sh)  | 6.7               | 0.79                  |
|          | [Pt(th(tbppy)3-isoquin)Cl]                                  | 588, 632, 687(sh)   | 10.1              | 0.25                  |
|          | [Pt(th(tbppy)3-isoquin)(CCC <sub>6</sub> F <sub>5</sub> )]  | 591, 636, 680(sh)   | 8.7               | 0.66                  |
|          | [Pt(bth(tbppy)3-isoquin)Cl]                                 | 644, 701, 780(sh)   | 4.5               | 0.033                 |
|          | [Pt(bth(tbppy)3-isoquin)(CCC <sub>6</sub> F <sub>5</sub> )] | 653, 710(sh)        | 4.6               | 0.082                 |
| <b>F</b> | [Pt(na(tbppy)py]                                            | 561, 597(sh)        | 0.7               | 0.10                  |
|          | [Pt(ph(tbppy)3-isoquin)(CC4-tolyl)]                         | 573                 | 3.5               | 0.27                  |

<sup>a</sup> From ref. 1, measured in CH<sub>2</sub>Cl<sub>2</sub> solution at 298 K; quin = 2-quinolinyl, 3-isoquin = 3-isoquinolinyl, 1-isoquin = 1-isoquinolyl.

<sup>b</sup>  $\Phi_L$  measured by the optical dilute method with [Ru(bpy)<sub>3</sub>](PF<sub>6</sub>)<sub>2</sub> (bpy = 2,2'-bipyridine) in degassed CH<sub>3</sub>CN as standard ( $\Phi_L = 0.062$ ) and calculated by:  $\Phi_{Ls} = \Phi_{Lr} (B_r/B_s)(n_s/n_r)^2(D_s/D_r)$ , s and r refer to sample and reference,  $n$  is the refractive index of the solvents,  $D$  is the integrated intensity and  $\Phi_L$  is the emission quantum yield. The excitation intensity  $B$  is calculated by:  $B = 1 - 10^{-ad}$ , where  $a$  is the absorbance at the excitation wavelength and  $d$  is the optical path length ( $d = 1$  cm in all cases). Errors for  $\Phi_L$  values (+/-10%) are estimated. <sup>c</sup> Nomenclature: 1 represents the position *ortho* to the Pt bound C atom.

**Table S9** TDDFT calculated transitions contributing to the emissive  $T_1$  state.<sup>a</sup>

| complex   | transitions               | contribution [%] |
|-----------|---------------------------|------------------|
| <b>1</b>  | HOMO-7 $\rightarrow$ LUMO | 22.6             |
|           | HOMO $\rightarrow$ LUMO   | 61.3             |
| <b>2</b>  | HOMO-7 $\rightarrow$ LUMO | 19.9             |
|           | HOMO-1 $\rightarrow$ LUMO | 28.5             |
|           | HOMO $\rightarrow$ LUMO   | 27.3             |
| <b>3</b>  | HOMO-8 $\rightarrow$ LUMO | 20.5             |
|           | HOMO-4 $\rightarrow$ LUMO | 10.4             |
|           | HOMO-1 $\rightarrow$ LUMO | 22.7             |
|           | HOMO $\rightarrow$ LUMO   | 31.2             |
| <b>4</b>  | HOMO-7 $\rightarrow$ LUMO | 28.0             |
|           | HOMO-1 $\rightarrow$ LUMO | 29.2             |
|           | HOMO $\rightarrow$ LUMO   | 21.4             |
| <b>6</b>  | HOMO-8 $\rightarrow$ LUMO | 25.4             |
|           | HOMO-3 $\rightarrow$ LUMO | 17.4             |
|           | HOMO $\rightarrow$ LUMO   | 35.2             |
| <b>9</b>  | HOMO-7 $\rightarrow$ LUMO | 15.2             |
|           | HOMO-2 $\rightarrow$ LUMO | 57.6             |
| <b>11</b> | HOMO $\rightarrow$ LUMO   | 56.1             |
|           | HOMO $\rightarrow$ LUMO+1 | 37.9             |
| <b>12</b> | HOMO $\rightarrow$ LUMO   | 53.7             |

|           |               |      |
|-----------|---------------|------|
|           | HOMO → LUMO+1 | 35.0 |
| <b>13</b> | HOMO → LUMO   | 56.7 |
|           | HOMO → LUMO+1 | 35.1 |
| <b>16</b> | HOMO → LUMO   | 63.9 |
|           | HOMO → LUMO+1 | 31.9 |
| <b>18</b> | HOMO-8 → LUMO | 21.6 |
|           | HOMO-1 → LUMO | 44.5 |
|           | HOMO → LUMO   | 14.6 |

<sup>a</sup> Based on the optimised  $T_1$  geometry. Only contributions with a weight > 10% are listed.

## References

1. P.-K. Chow, G. Cheng, G. S. M. Tong, W.-P.g To, W.-L. Kwong, K.-H. Low, C.-C. Kwok, C. Ma, C.-M. Che, Luminescent Pincer Platinum(II) Complexes with Emission Quantum Yields up to Almost Unity: Photophysics, Photoreductive C–C Bond Formation, and Materials Applications, *Angew. Chem. Int. Ed.* 2015, **54**, 2084–2089.
